# Supplementary material for: A study of optical absorption of cysteine-capped CdSe nanoclusters using first-principles calculations
Source: Royal Society of Chemistry journal article supplement (doi:10.1039/c4cp06103a), 2015-01-01
Supplement: c4cp06103a1.pdf [file c4cp06103a1.pdf]

## Supplementary Information

### **Optical absorption of cysteine-ligated CdSe nanoclusters from first-principles calculations**

Yingqi Cui, Zhaoyang Lou, Xinqin Wang, Shengping Yu and Mingli Yang

Institute of Atomic and Molecular Physics, Sichuan University, Chengdu 610065, China

## Contents

**Table S1** Average bond lengths (in Å) and bond angles (in degree) of  $(\text{CdSe})_2$  calculated with PBE0 functional.

**Table S2** Selected bond lengths (in Å) of  $(\text{CdSe})_3$ -Cys complexes optimized with PBE0 functional and 6-31++G(d,p)/Lan12DZ or 6-311++G(d,p)/SDD basis set.

**Table S3** Bond lengths of the  $(\text{CdSe})_N$  clusters ( $N = 3, 6$  and  $9$ ) in water and gas calculated with PBE0 functional.

**Table S4** Bond lengths of selected bonds in the  $(\text{CdSe})_N$ -Cys complexes calculated with PBE0 functional.

**Table S5** NBO population analysis of  $(\text{CdSe})_N$  and  $(\text{CdSe})_N$ -Cys calculated with PBE0 functional. Q is atomic net charge, and EC is electronic configuration.

**Fig. S1** Optical absorption spectra of  $(\text{CdSe})_3$ -Cys calculated with PBE0 functional and 6-31++G(d,p)/Lan12DZ or PBE0/6-311++G(d,p)/SDD basis set.

**Fig. S2** Structures, symmetry and relative energy (in eV) of the low-lying  $(\text{CdSe})_N$  ( $N = 2-10, 13, 16$  and  $19$ ) clusters in water calculated with PBE0 functional.

**Fig. S3** Structures, symmetry and relative energy (in eV) of the low-lying  $(\text{CdSe})_N$  ( $N = 4-10, 13, 16$  and  $19$ ) clusters in gas calculated with PBE0 functional.

**Fig. S4** The lowest-energy structures and symmetry of  $(\text{CdSe})_N$  ( $N = 2-10, 13, 16$  and  $19$ ) clusters in toluene calculated with PBE0 functional.

**Fig. S5** Comparison of the  $(\text{CdSe})_N$ -Cys ( $N = 3, 6$ ) structures with different adsorption patterns in gas (a), toluene (b) and water (c) with PBE0. The relative energies are given in eV.

**Fig. S6** The lowest-energy structures of  $(\text{CdSe})_N$ -Cys complexes of ( $N = 1-10, 13, 16$  and  $19$ ) in gas calculated with PBE0 functional.

**Fig. S7** The lowest-energy structures of  $(\text{CdSe})_N$ -Cys complexes of ( $N = 1-10, 13, 16$  and  $19$ ) in toluene calculated with PBE0 functional.

**Fig. S8** The lowest-energy structures of  $(\text{CdSe})_N$ -Cys complexes of ( $N = 1-10, 13, 16$  and  $19$ ) in alkaline solution calculated with PBE0 functional.

**Fig. S9** Structures and relative energy (in eV) of the  $(\text{CdSe})_N$ -Cys complexes ( $N = 5-10, 13, 16$  and  $19$ ) clusters in alkaline solution calculated with PBE0 functional.

## Coordinates of the lowest-energy structures presented in this paper

Cartesian coordinates of CdSe cluster in gas

Cartesian coordinates of CdSe cluster in toluene

Cartesian coordinates of CdSe cluster in water

Cartesian coordinates of CdSe-Cys clusters in alkaline solution

Cartesian coordinates of CdSe-Cys clusters in gas

Cartesian coordinates of CdSe-Cys clusters in water

Cartesian coordinates of CdSe-Cys clusters in toluene

**Table S1** Average bond lengths (in Å) and bond angles (in degree) of (CdSe)<sub>2</sub> calculated with PBE0 functional.

| Functional | CCSD(T) | B3LYP  | PBE0   | M06-2X |
|------------|---------|--------|--------|--------|
| Cd-Se      | 2.606   | 2.663  | 2.624  | 2.645  |
| Cd-Cd      | 2.842   | 2.980  | 2.921  | 2.970  |
| ∠Se-Cd-Se  | 113.90  | 111.94 | 112.36 | 111.68 |
| ∠Cd-Se-Cd  | 66.10   | 68.06  | 67.64  | 68.31  |

**Table S2** Selected bond lengths (in Å) of (CdSe)<sub>3</sub>-Cys complexes optimized with PBE0 functional and 6-31++G(d,p)/Lanl2DZ or 6-311++G(d,p)/SDD basis set.

|                      | N-Cd  | S-Cd  | Se-Cd |
|----------------------|-------|-------|-------|
| 6-31++G(d,p)/Lanl2DZ | 2.464 | 2.855 | 2.596 |
| 6-311++G(d,p)/SDD    | 2.466 | 2.860 | 2.560 |

**Table S3** Bond lengths of the  $(\text{CdSe})_N$  clusters ( $N = 3, 6$  and  $9$ ) in water and gas calculated with PBE0 functional.

| N | Water     | Gas       |
|---|-----------|-----------|
|   | Cd–Se (Å) | Cd–Se (Å) |
| 3 | 2.656     | 2.562     |
| 6 | 2.811     | 2.715     |
| 9 | 2.778     | 2.639     |

**Table S4** Bond lengths of selected bonds in the (CdSe)<sub>N</sub>-Cys complexes calculated with PBE0 functional.

| N  | Gas   |       | Toluene |       | Water |       | Alkaline |       |
|----|-------|-------|---------|-------|-------|-------|----------|-------|
|    | N-Cd  | S-Cd  | N-Cd    | S-Cd  | O-Cd  | H-Se  | N-Cd     | S-Cd  |
| 1  | 2.506 | 2.883 | 2.456   | 2.895 | 2.443 | 2.398 | 2.438    | 2.600 |
| 2  | 2.463 | 2.828 | 2.488   | 2.870 | 2.488 | 2.462 | 2.425    | 2.625 |
| 3  | 2.476 | 2.864 | 2.452   | 2.897 | 2.554 | 2.546 | 2.460    | 2.649 |
| 4  | 2.437 | 2.954 | 2.433   | 3.045 | 2.626 | 2.508 | 2.466    | 2.633 |
| 5  | 2.399 | 2.790 | 2.414   | 2.933 | 2.518 | 2.495 | 2.413    | 2.622 |
| 6  | 2.422 | 2.966 | 2.436   | 3.009 | 2.523 | 2.474 | 2.447    | 2.631 |
| 7  | 2.466 | 2.834 | 2.454   | 2.915 | 2.542 | 2.569 | 2.439    | 2.612 |
| 8  | 2.507 | 2.847 | 2.446   | 3.181 | 2.582 | 2.525 | 2.473    | 2.628 |
| 9  | 2.506 | 2.823 | 2.430   | 3.089 | 2.579 | 2.506 | 2.451    | 2.625 |
| 10 | 2.500 | 2.850 | 2.507   | 2.936 | 2.649 | 2.655 | 2.432    | 2.612 |
| 13 | 2.427 | 2.809 | 2.441   | 2.893 | 2.507 | 2.553 | 2.453    | 2.636 |
| 16 | 2.462 | 3.093 | 2.487   | 3.219 | 2.534 | 2.574 | 2.403    | 2.617 |
| 19 | 2.580 | 2.866 | 2.557   | 2.922 | 2.568 | 2.705 | 2.408    | 2.616 |

**Table S5** NBO population analysis of (CdSe)<sub>N</sub> and (CdSe)<sub>N</sub>-Cys calculated with PBE0 functional. Q is atomic net charge, and EC is electronic configuration.

| N  | (CdSe) <sub>N</sub> |        |                                                                              | (CdSe) <sub>N</sub> -Cys |        |                                                                                                |
|----|---------------------|--------|------------------------------------------------------------------------------|--------------------------|--------|------------------------------------------------------------------------------------------------|
|    |                     | Q      | EC                                                                           |                          | Q      | EC                                                                                             |
| 1  | Cd                  | 1.455  | 5S <sup>0.43</sup> 4d <sup>9.99</sup> 5p <sup>0.12</sup>                     | Cd                       | 1.105  | 5s <sup>0.52</sup> 4d <sup>9.99</sup> 5p <sup>0.37</sup> 6p <sup>0.01</sup>                    |
|    | Se                  | -1.455 | 4S <sup>1.95</sup> 4p <sup>5.50</sup>                                        | Se                       | -1.431 | 4s <sup>1.89</sup> 4p <sup>5.54</sup>                                                          |
|    | S                   |        |                                                                              | S                        | -0.651 | 3s <sup>1.78</sup> 3p <sup>4.84</sup> 3d <sup>0.01</sup> 4p <sup>0.01</sup> 5p <sup>0.01</sup> |
| 2  | Cd                  | 1.321  | 5S <sup>0.44</sup> 4d <sup>10.00</sup> 5p <sup>0.24</sup> 6p <sup>0.01</sup> | Cd                       | 0.963  | 5s <sup>0.50</sup> 4d <sup>9.99</sup> 5p <sup>0.53</sup> 6p <sup>0.01</sup>                    |
|    | Se                  | -1.321 | 4S <sup>1.89</sup> 4p <sup>5.43</sup>                                        | Se                       | -1.291 | 4s <sup>1.86</sup> 4p <sup>5.43</sup>                                                          |
|    | S                   |        |                                                                              | S                        | -0.637 | 3s <sup>1.77</sup> 3p <sup>4.84</sup> 3d <sup>0.01</sup> 4p <sup>0.01</sup> 5p <sup>0.01</sup> |
| 3  | Cd                  | 1.242  | 5S <sup>0.49</sup> 4d <sup>9.99</sup> 5p <sup>0.26</sup> 6p <sup>0.01</sup>  | Cd                       | 0.975  | 5s <sup>0.49</sup> 4d <sup>9.99</sup> 5p <sup>0.52</sup> 6p <sup>0.01</sup>                    |
|    | Se                  | -1.252 | 4S <sup>1.87</sup> 4p <sup>5.39</sup>                                        | Se                       | -1.253 | 4s <sup>1.84</sup> 4p <sup>5.41</sup>                                                          |
|    | S                   |        |                                                                              | S                        | -0.644 | 3s <sup>1.77</sup> 3p <sup>4.85</sup> 3d <sup>0.01</sup> 5p <sup>0.01</sup>                    |
| 4  | Cd                  | 1.257  | 5S <sup>0.50</sup> 4d <sup>9.99</sup> 5p <sup>0.24</sup> 6p <sup>0.01</sup>  | Cd                       | 1.007  | 5s <sup>0.49</sup> 4d <sup>9.99</sup> 5p <sup>0.50</sup> 6p <sup>0.01</sup>                    |
|    | Se                  | -1.257 | 4S <sup>1.87</sup> 4p <sup>5.39</sup>                                        | Se                       | -1.281 | 4s <sup>1.83</sup> 4p <sup>5.45</sup>                                                          |
|    | S                   |        |                                                                              | S                        | -0.641 | 3s <sup>1.77</sup> 3p <sup>4.84</sup> 3d <sup>0.01</sup> 5p <sup>0.01</sup>                    |
| 5  | Cd                  | 1.198  | 5S <sup>0.43</sup> 4d <sup>10.00</sup> 5p <sup>0.36</sup> 6p <sup>0.01</sup> | Cd                       | 0.938  | 5s <sup>0.47</sup> 4d <sup>9.99</sup> 5p <sup>0.58</sup> 6p <sup>0.01</sup>                    |
|    | Se                  | -1.155 | 4S <sup>1.81</sup> 4p <sup>5.34</sup>                                        | Se                       | -1.164 | 4s <sup>1.81</sup> 4p <sup>5.35</sup>                                                          |
|    | S                   |        |                                                                              | S                        | -0.626 | 3s <sup>1.75</sup> 3p <sup>4.84</sup> 4s <sup>0.01</sup> 3d <sup>0.01</sup> 5p <sup>0.01</sup> |
| 6  | Cd                  | 1.138  | 5S <sup>0.46</sup> 4d <sup>9.99</sup> 5p <sup>0.39</sup> 6p <sup>0.02</sup>  | Cd                       | 0.924  | 5s <sup>0.49</sup> 4d <sup>9.99</sup> 5p <sup>0.57</sup> 6p <sup>0.02</sup>                    |
|    | Se                  | -1.148 | 4S <sup>1.81</sup> 4p <sup>5.34</sup>                                        | Se                       | -1.139 | 4s <sup>1.81</sup> 4p <sup>5.33</sup>                                                          |
|    | S                   |        |                                                                              | S                        | -0.626 | 3s <sup>1.75</sup> 3p <sup>4.84</sup> 3d <sup>0.01</sup> 5p <sup>0.01</sup>                    |
| 7  | Cd                  | 1.154  | 5S <sup>0.45</sup> 4d <sup>9.99</sup> 5p <sup>0.39</sup> 6p <sup>0.01</sup>  | Cd                       | 1.091  | 5s <sup>0.46</sup> 4d <sup>9.99</sup> 5p <sup>0.44</sup> 6p <sup>0.01</sup>                    |
|    | Se                  | -1.220 | 4S <sup>1.83</sup> 4p <sup>5.39</sup>                                        | Se                       | -1.220 | 4s <sup>1.84</sup> 4p <sup>5.38</sup>                                                          |
|    | S                   |        |                                                                              | S                        | -0.636 | 3s <sup>1.76</sup> 3p <sup>4.84</sup> 3d <sup>0.01</sup> 5p <sup>0.01</sup>                    |
| 8  | Cd                  | 1.178  | 5S <sup>0.45</sup> 4d <sup>9.99</sup> 5p <sup>0.36</sup> 6p <sup>0.01</sup>  | Cd                       | 1.092  | 5s <sup>0.44</sup> 4d <sup>9.99</sup> 5p <sup>0.46</sup> 6p <sup>0.01</sup>                    |
|    | Se                  | -1.170 | 4S <sup>1.81</sup> 4p <sup>5.36</sup>                                        | Se                       | -1.175 | 4s <sup>1.78</sup> 4p <sup>5.39</sup>                                                          |
|    | S                   |        |                                                                              | S                        | -0.639 | 3s <sup>1.76</sup> 3p <sup>4.85</sup> 3d <sup>0.01</sup> 4p <sup>0.01</sup> 5p <sup>0.01</sup> |
| 9  | Cd                  | 1.141  | 5S <sup>0.47</sup> 4d <sup>9.99</sup> 5p <sup>0.38</sup> 6p <sup>0.01</sup>  | Cd                       | 0.962  | 5s <sup>0.50</sup> 4d <sup>9.99</sup> 5p <sup>0.52</sup> 6p <sup>0.02</sup>                    |
|    | Se                  | -1.146 | 4S <sup>1.79</sup> 4p <sup>5.35</sup>                                        | Se                       | -1.153 | 4s <sup>1.79</sup> 4p <sup>5.37</sup>                                                          |
|    | S                   |        |                                                                              | S                        | -0.636 | 3s <sup>1.76</sup> 3p <sup>4.85</sup> 3d <sup>0.01</sup> 5p <sup>0.01</sup>                    |
| 10 | Cd                  | 1.156  | 5S <sup>0.46</sup> 4d <sup>9.99</sup> 5p <sup>0.37</sup> 6p <sup>0.02</sup>  | Cd                       | 0.983  | 5s <sup>0.49</sup> 4d <sup>9.99</sup> 5p <sup>0.51</sup> 6p <sup>0.02</sup>                    |
|    | Se                  | -1.151 | 4S <sup>1.79</sup> 4p <sup>5.36</sup>                                        | Se                       | -1.152 | 4s <sup>1.80</sup> 4p <sup>5.35</sup>                                                          |
|    | S                   |        |                                                                              | S                        | -0.629 | 3s <sup>1.76</sup> 3p <sup>4.84</sup> 3d <sup>0.01</sup> 4p <sup>0.01</sup> 5p <sup>0.01</sup> |
| 13 | Cd                  | 1.324  | 5S <sup>0.40</sup> 4d <sup>9.99</sup> 5p <sup>0.24</sup> 6p <sup>0.01</sup>  | Cd                       | 1.099  | 5s <sup>0.45</sup> 4d <sup>9.99</sup> 5p <sup>0.44</sup> 6p <sup>0.01</sup>                    |
|    | Se                  | -1.142 | 4S <sup>1.78</sup> 4p <sup>5.36</sup>                                        | Se                       | -1.147 | 4s <sup>1.78</sup> 4p <sup>5.37</sup>                                                          |
|    | S                   |        |                                                                              | S                        | -0.635 | 3s <sup>1.76</sup> 3p <sup>4.84</sup> 3d <sup>0.01</sup> 5p <sup>0.02</sup>                    |
| 16 | Cd                  | 1.175  | 5S <sup>0.46</sup> 4d <sup>9.99</sup> 5p <sup>0.35</sup> 6p <sup>0.01</sup>  | Cd                       | 1.016  | 5s <sup>0.47</sup> 4d <sup>9.99</sup> 5p <sup>0.50</sup> 6p <sup>0.01</sup>                    |
|    | Se                  | -1.178 | 4S <sup>1.80</sup> 4p <sup>5.38</sup>                                        | Se                       | -1.174 | 4s <sup>1.78</sup> 4p <sup>5.40</sup>                                                          |
|    | S                   |        |                                                                              | S                        | -0.633 | 3s <sup>1.76</sup> 3p <sup>4.84</sup> 4s <sup>0.01</sup> 3d <sup>0.01</sup> 5p <sup>0.01</sup> |
| 19 | Cd                  | 1.182  | 5S <sup>0.46</sup> 4d <sup>9.99</sup> 5p <sup>0.35</sup> 6p <sup>0.01</sup>  | Cd                       | 1.105  | 5s <sup>0.44</sup> 4d <sup>9.99</sup> 5p <sup>0.44</sup> 6p <sup>0.01</sup>                    |
|    | Se                  | -1.185 | 4S <sup>1.78</sup> 4p <sup>5.40</sup>                                        | Se                       | -1.163 | 4s <sup>1.77</sup> 4p <sup>5.39</sup>                                                          |
|    | S                   |        |                                                                              | S                        | -0.631 | 3s <sup>1.76</sup> 3p <sup>4.84</sup> 3d <sup>0.01</sup> 4p <sup>0.01</sup> 5p <sup>0.01</sup> |

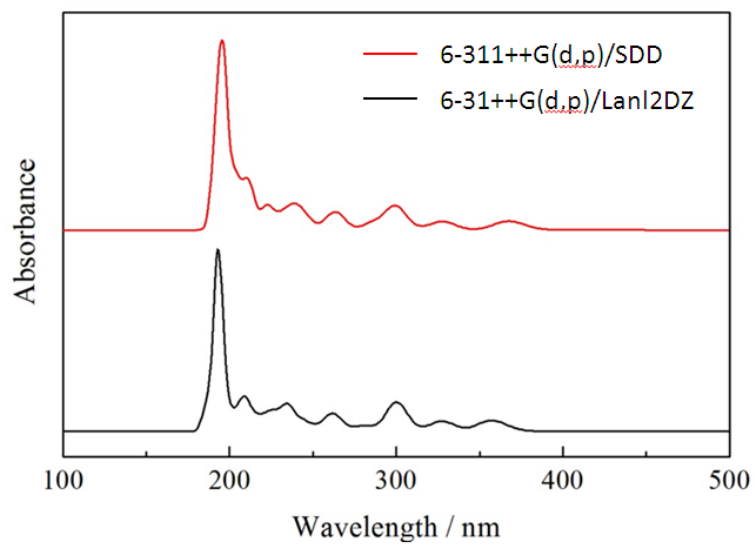

**Fig. S1** Optical absorption spectra of (CdSe)<sub>3</sub>-Cys calculated with PBE0 functional and 6-31++G(d,p)/LanI2DZ or PBE0/6-311++G(d,p)/SDD basis set..



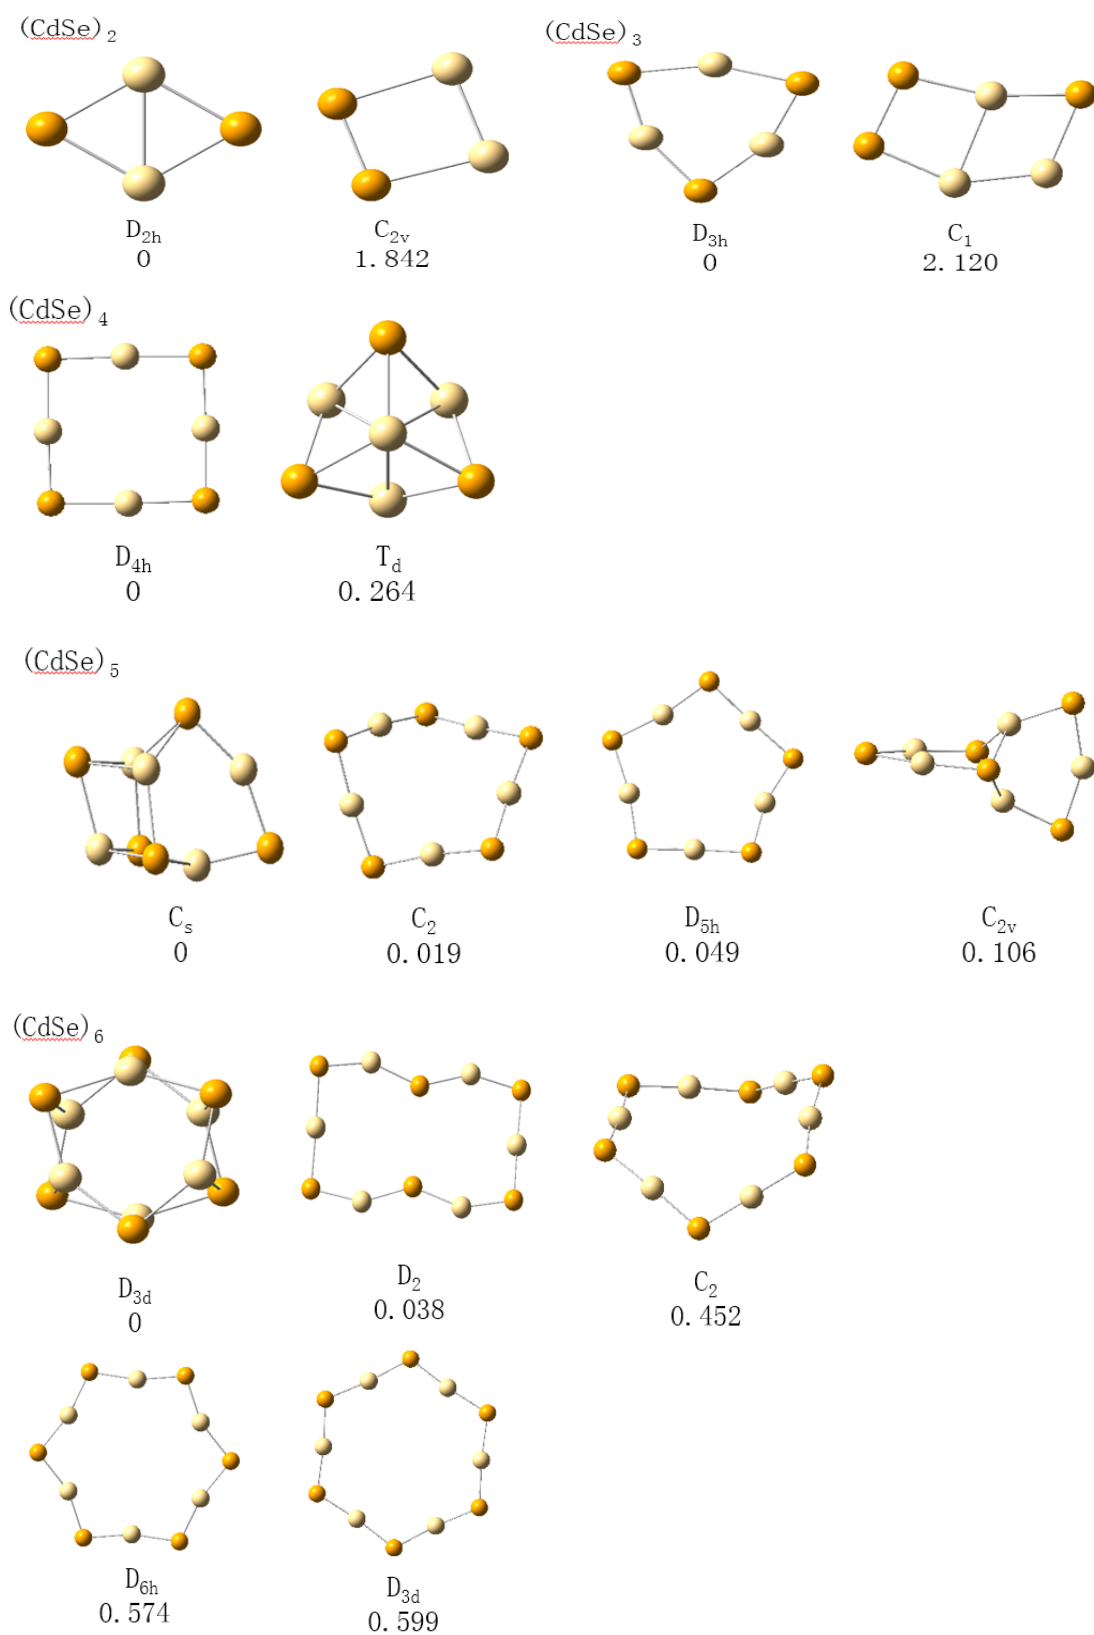

**Fig. S2** Structures, symmetry and relative energy (in eV) of the low-lying (CdSe)<sub>N</sub> ( $N = 2-10, 13, 16$  and  $19$ ) clusters in water calculated with PBE0 functional.

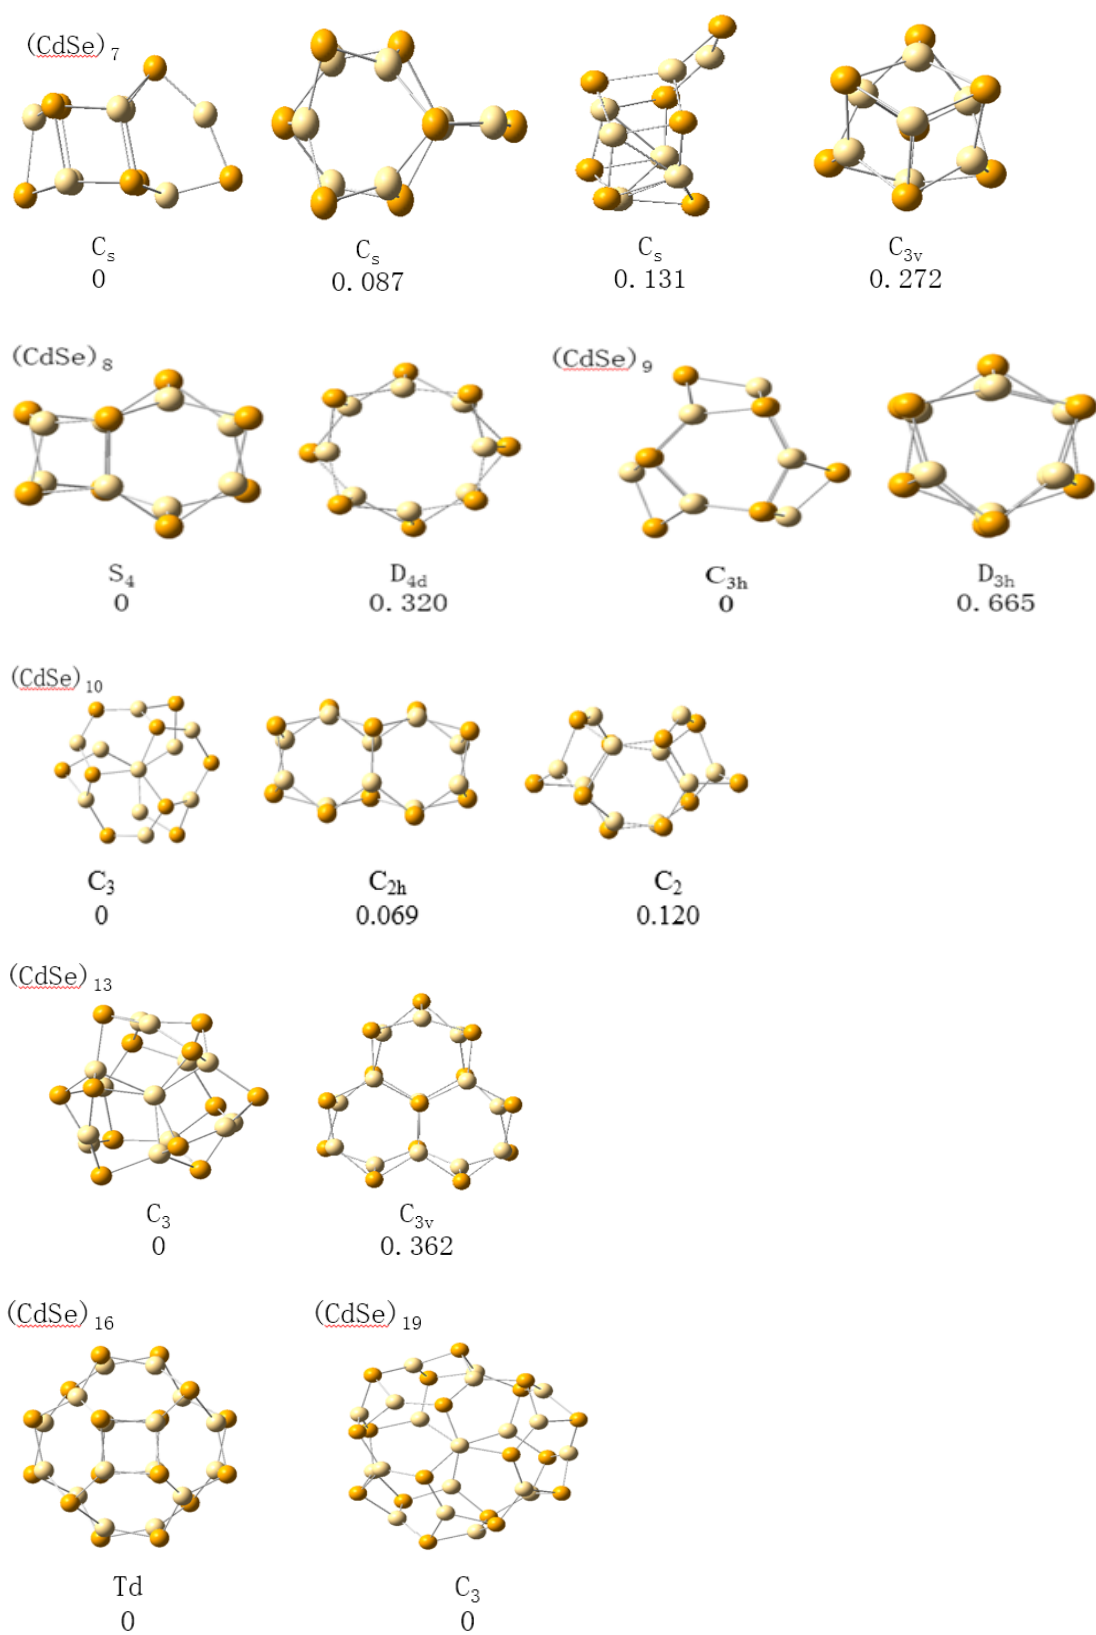

**Fig. S2** Structures, symmetry and relative energy (in eV) of the low-lying  $(\text{CdSe})_N$  ( $N = 2-10, 13, 16$  and  $19$ ) clusters in water calculated with PBE0 functional (Continued).

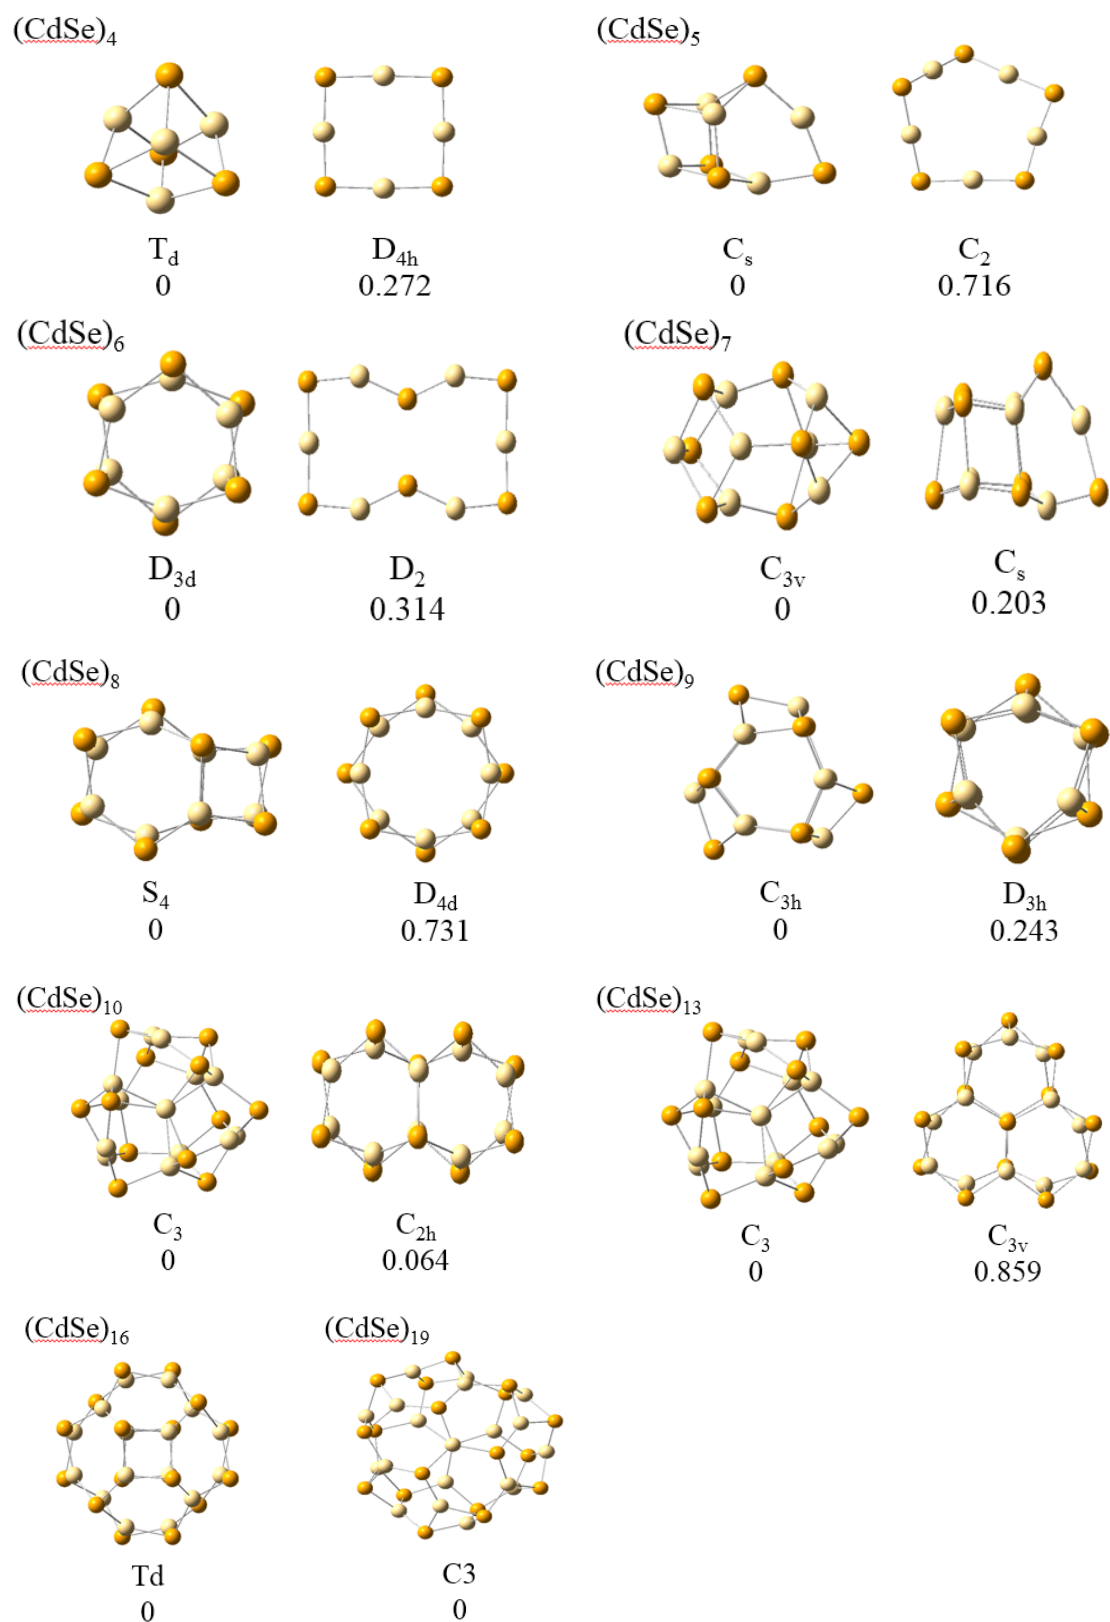

**Fig. S3** Structures, symmetry and relative energy (in eV) of the low-lying  $(\text{CdSe})_N$  ( $N = 4-10, 13, 16$  and  $19$ ) clusters in gas calculated with PBE0 functional.

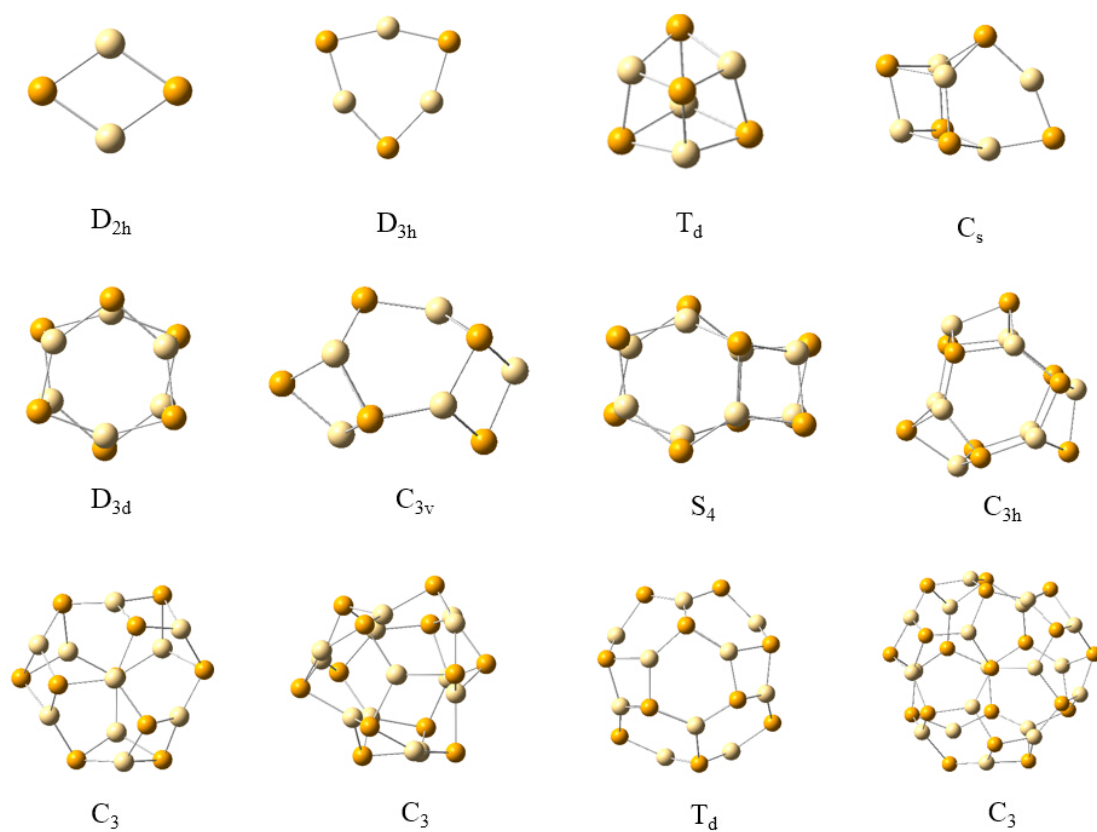

**Fig. S4** The lowest-energy structures and symmetry of  $(CdSe)_N$  ( $N = 2-10, 13, 16$  and  $19$ ) clusters in toluene calculated with PBE0 functional.

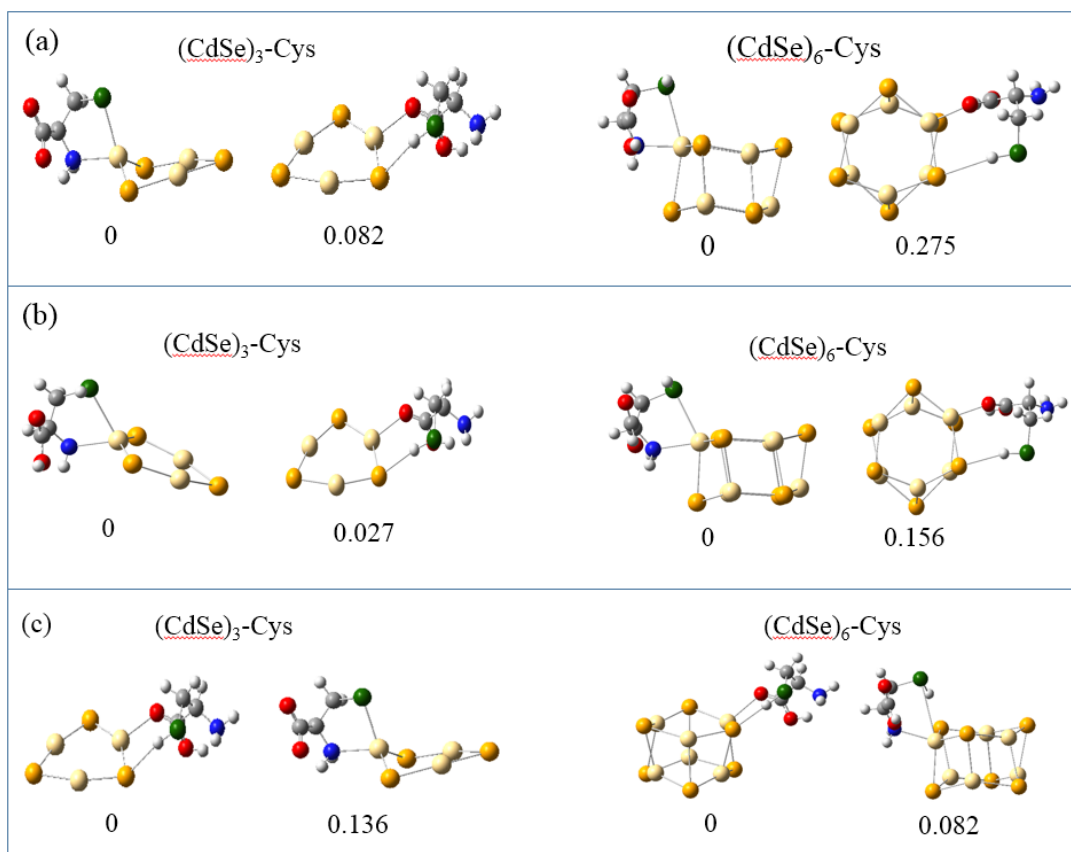

**Fig. S5** Comparison of the  $(\text{CdSe})_N\text{-Cys}$  ( $N = 3, 6$ ) structures with different adsorption patterns in gas (a), toluene (b) and water (c) with PBE0. The relative energies are given in eV.

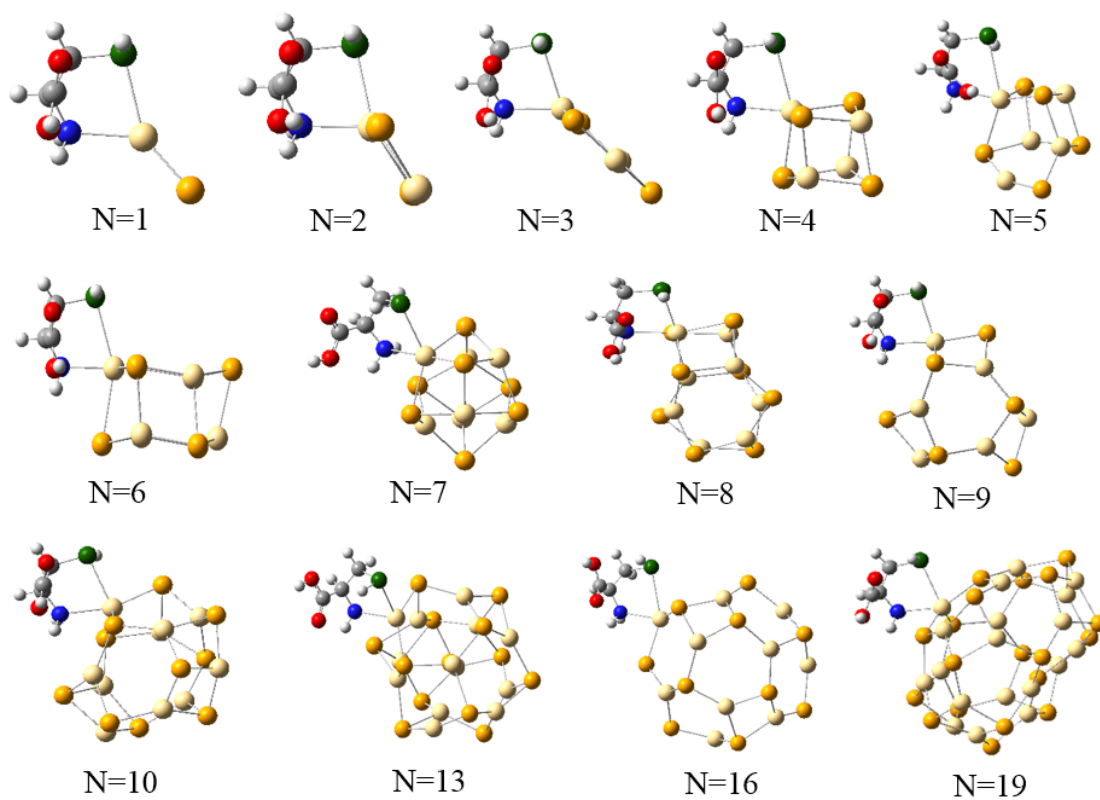

**Fig. S6** The lowest-energy structures of  $(\text{CdSe})_N\text{-Cys}$  complexes of ( $N = 1-10, 13, 16$  and  $19$ ) in gas calculated with PBE0 functional.

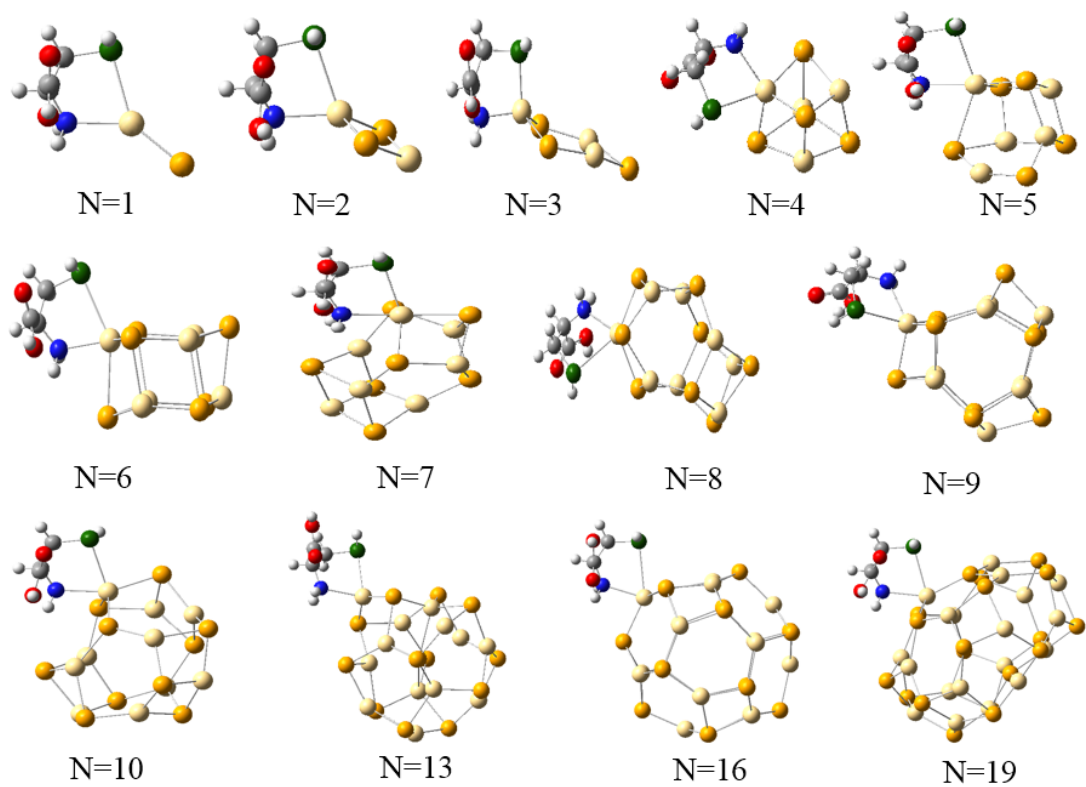

**Fig. S7** The lowest-energy structures of  $(\text{CdSe})_N\text{-Cys}$  complexes of ( $N = 1-10, 13, 16$  and  $19$ ) in toluene calculated with PBE0 functional.

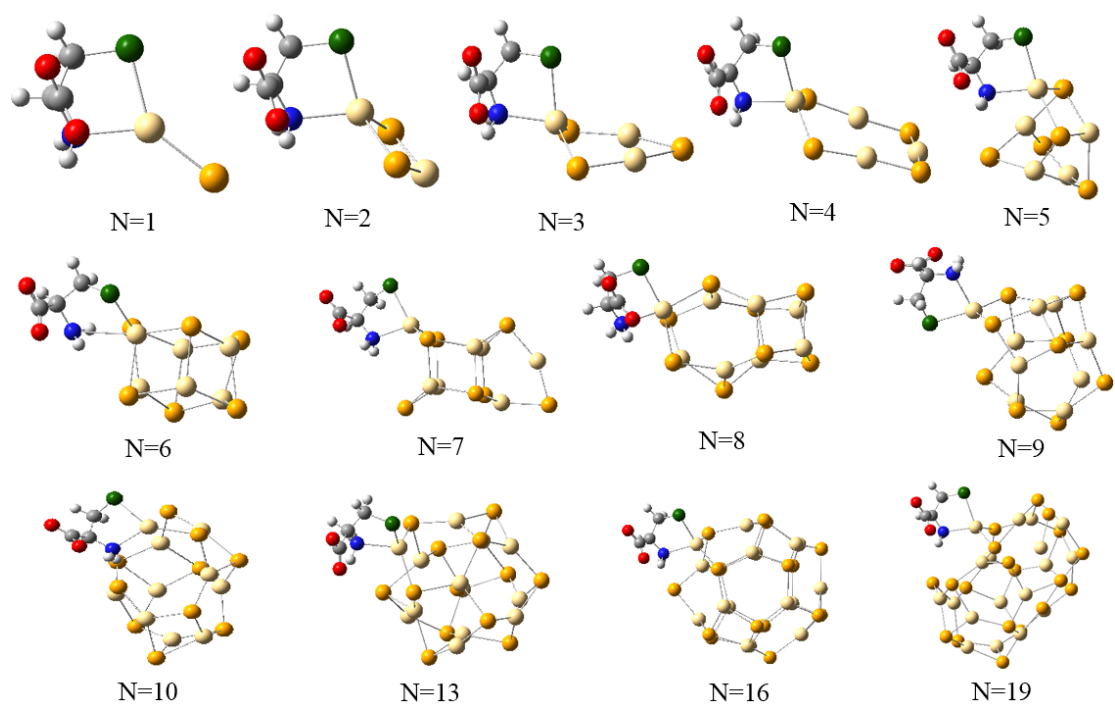

**Fig. S8** The lowest-energy structures of  $(\text{CdSe})_N\text{-Cys}$  complexes of ( $N = 1\text{--}10, 13, 16$  and  $19$ ) in alkaline solution calculated with PBE0 functional.



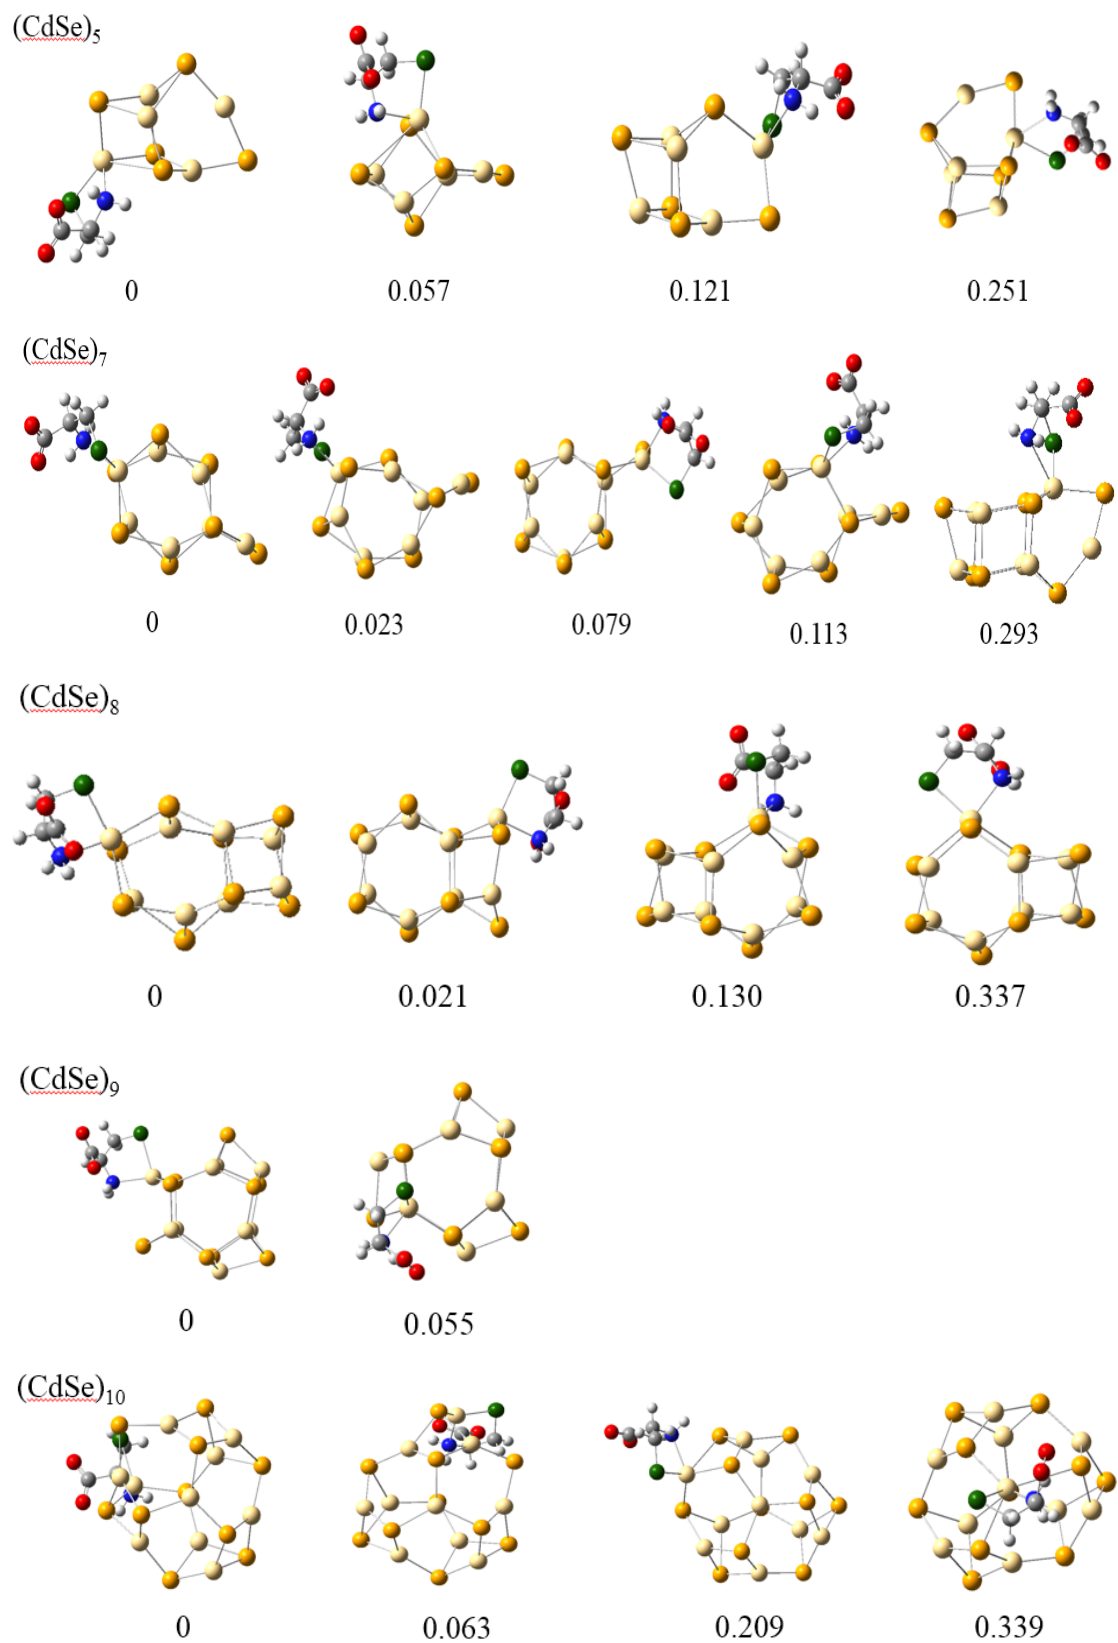

**Fig. S9** Structures and relative energy (in eV) of the (CdSe)<sub>N</sub>-Cys complexes ( $N = 5-10, 13, 16$  and  $19$ ) clusters in alkaline solution calculated with PBE0 functional.

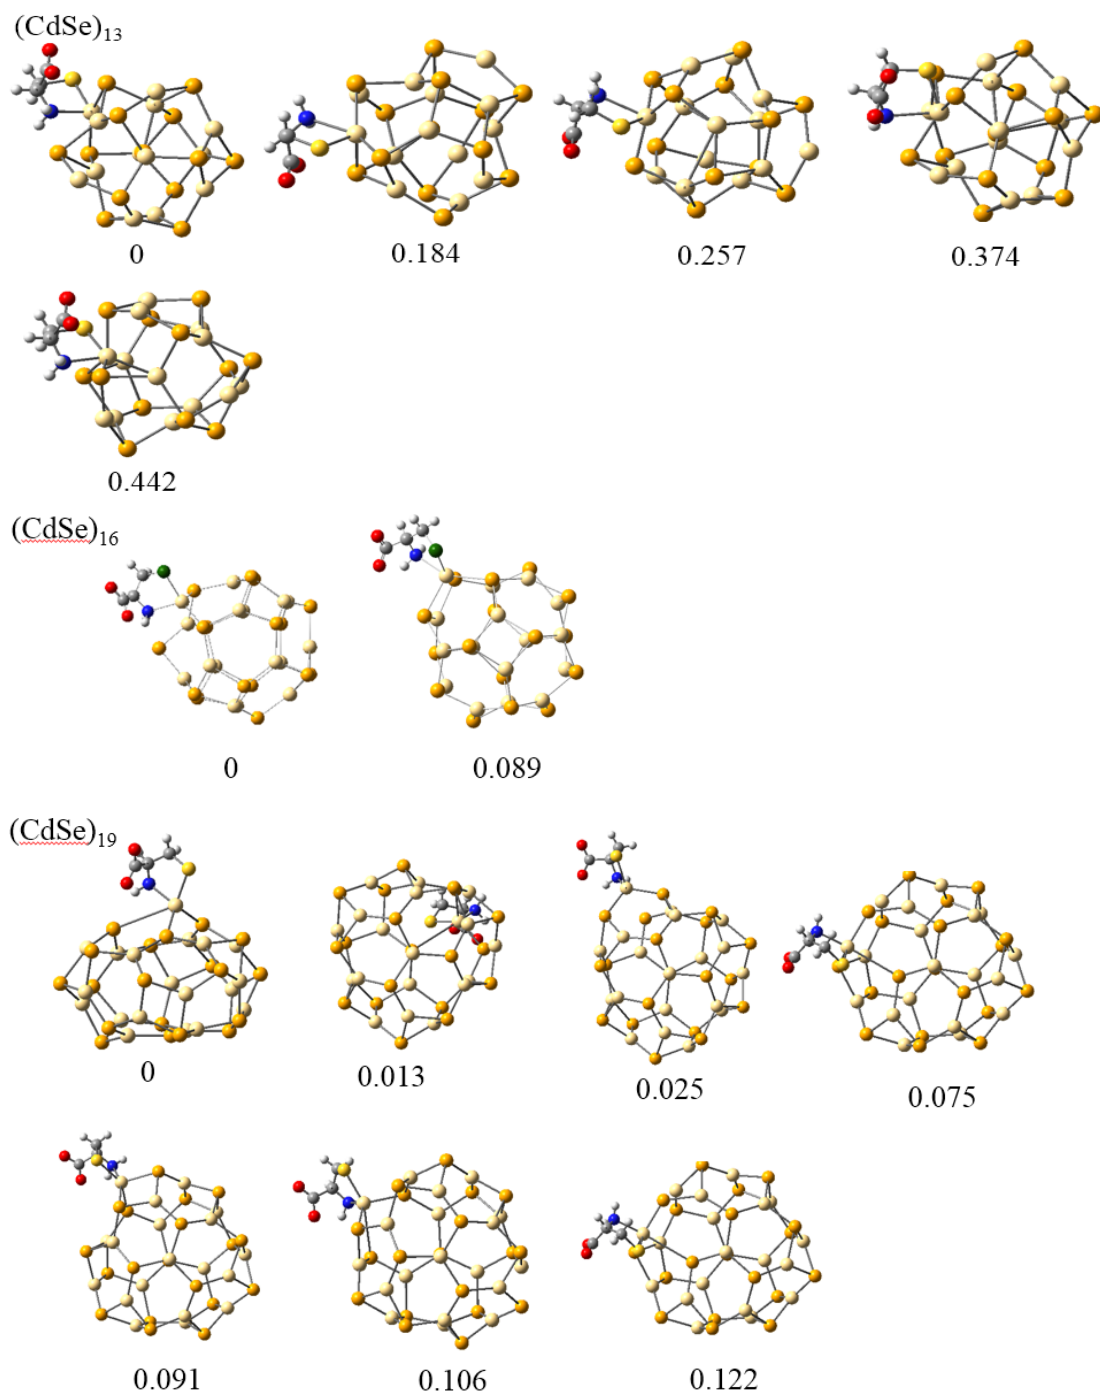

**Fig. S9** Structures and relative energy (in eV) of the (CdSe)<sub>N</sub>-Cys complexes ( $N = 5-10, 13, 16$  and  $19$ ) clusters in alkaline solution calculated with PBE0 functional (Continued).

### Cartesian coordinates of CdSe cluster in gas

Gas

(CdSe)<sub>1</sub>

|    |            |            |             |
|----|------------|------------|-------------|
| Se | 0.00000000 | 0.00000000 | -1.42680900 |
| Cd | 0.00000000 | 0.00000000 | 1.01065600  |

(CdSe)<sub>2</sub>

|    |             |             |            |
|----|-------------|-------------|------------|
| Cd | -0.00002900 | -1.46052200 | 0.00000000 |
| Cd | 0.00000000  | 1.46049900  | 0.00000000 |
| Se | -2.17985400 | -0.00104200 | 0.00000000 |
| Se | 2.17989500  | 0.00107400  | 0.00000000 |

(CdSe)<sub>3</sub>

|    |             |             |            |
|----|-------------|-------------|------------|
| Cd | 0.00000000  | 1.97095100  | 0.00000000 |
| Cd | 1.70689300  | -0.98547500 | 0.00000000 |
| Cd | -1.70689300 | -0.98547500 | 0.00000000 |
| Se | 0.00000000  | -2.89639600 | 0.00000000 |
| Se | 2.50835300  | 1.44819800  | 0.00000000 |
| Se | -2.50835300 | 1.44819800  | 0.00000000 |

(CdSe)<sub>4</sub>

|    |             |             |             |
|----|-------------|-------------|-------------|
| Se | -1.52960400 | 1.52960400  | 1.52960400  |
| Se | 1.52960400  | 1.52960400  | -1.52960400 |
| Se | -1.52960400 | -1.52960400 | -1.52960400 |
| Cd | 1.15895600  | 1.15895600  | 1.15895600  |
| Cd | -1.15895600 | -1.15895600 | 1.15895600  |
| Cd | -1.15895600 | 1.15895600  | -1.15895600 |
| Cd | 1.15895600  | -1.15895600 | -1.15895600 |
| Se | 1.52960400  | -1.52960400 | 1.52960400  |

(CdSe)<sub>5</sub>

|    |             |             |             |
|----|-------------|-------------|-------------|
| Cd | 2.85974800  | 0.73963000  | 0.00000000  |
| Cd | 0.94601900  | -1.91200600 | 0.00000000  |
| Cd | -0.74893600 | 1.22764700  | 1.58841800  |
| Se | -0.74893600 | -1.41326200 | 2.12268500  |
| Se | 3.56554500  | -1.67806800 | 0.00000000  |
| Se | 1.05645700  | 2.60139400  | 0.00000000  |
| Se | -0.74893600 | -1.41326200 | -2.12268500 |
| Se | -2.95171400 | 1.59382400  | 0.00000000  |
| Cd | -2.43002300 | -1.06377900 | 0.00000000  |
| Cd | -0.74893600 | 1.22764700  | -1.58841800 |

(CdSe)<sub>6</sub>

|    |             |             |             |
|----|-------------|-------------|-------------|
| Cd | 0.00000000  | 2.28407600  | 1.21604400  |
| Cd | 1.97806800  | -1.14203800 | 1.21604400  |
| Cd | -1.97806800 | -1.14203800 | 1.21604400  |
| Se | 2.50700700  | 1.44742100  | 1.53734700  |
| Se | -2.50700700 | 1.44742100  | 1.53734700  |
| Se | 0.00000000  | -2.89484300 | 1.53734700  |
| Se | 0.00000000  | 2.89484300  | -1.53734700 |
| Se | 2.50700700  | -1.44742100 | -1.53734700 |
| Se | -2.50700700 | -1.44742100 | -1.53734700 |
| Cd | 1.97806800  | 1.14203800  | -1.21604400 |
| Cd | -1.97806800 | 1.14203800  | -1.21604400 |
| Cd | 0.00000000  | -2.28407600 | -1.21604400 |

(CdSe)<sub>7</sub>

|    |             |             |             |
|----|-------------|-------------|-------------|
| Se | 2.62174700  | 0.23750000  | -2.45342600 |
| Se | 2.62301200  | 2.00590900  | 1.43191700  |
| Cd | 1.22735400  | 1.97807800  | -0.90010400 |
| Cd | 3.76039600  | 0.00021800  | -0.00080400 |
| Se | -4.34211400 | -0.00024400 | -0.00004300 |
| Se | -1.33109400 | 2.59604000  | -1.18143100 |
| Cd | -2.37174600 | 1.53139500  | 1.09362800  |
| Cd | -2.37073900 | 0.18112700  | -1.87288800 |
| Cd | 1.22758300  | -1.76885700 | -1.26241900 |
| Cd | -2.37127100 | -1.71279000 | 0.77968500  |
| Cd | 1.22842000  | -0.20925500 | 2.16338700  |
| Se | -1.33009400 | -0.27465800 | 2.83860400  |
| Se | -1.33047400 | -2.32139900 | -1.65715800 |
| Se | 2.62313800  | -2.24303100 | 1.02085200  |

(CdSe)<sub>8</sub>

|    |             |             |             |
|----|-------------|-------------|-------------|
| Se | -3.57409800 | -1.93024300 | 0.86091100  |
| Cd | -3.09360000 | -0.74160000 | -1.46650400 |
| Se | -1.00841100 | -0.42511200 | -3.11720500 |
| Cd | 0.99465400  | -1.62539700 | -1.88630400 |
| Se | 1.00841600  | -3.11721500 | 0.42511500  |
| Cd | -0.99465300 | -1.88630900 | 1.62538800  |
| Se | -1.00840700 | 0.42511100  | 3.11720800  |
| Cd | -3.09359500 | 0.74159900  | 1.46650500  |
| Se | -3.57410200 | 1.93024100  | -0.86090700 |
| Cd | -0.99465700 | 1.88630800  | -1.62538800 |
| Se | 1.00841000  | 3.11721600  | -0.42511400 |
| Cd | 0.99465700  | 1.62539700  | 1.88630700  |
| Se | 3.57409700  | -0.86091000 | -1.93024400 |
| Cd | 3.09359800  | -1.46650300 | 0.74160100  |

|    |            |            |             |
|----|------------|------------|-------------|
| Se | 3.57410100 | 0.86091300 | 1.93023700  |
| Cd | 3.09359000 | 1.46650500 | -0.74160600 |

(CdSe)<sub>9</sub>

|    |             |             |             |
|----|-------------|-------------|-------------|
| Se | 2.84841200  | 3.01799900  | 0.00000000  |
| Cd | 1.91802600  | 1.46226000  | 1.98376800  |
| Se | 2.62271200  | -1.02163100 | 2.51457300  |
| Se | -0.42659800 | 2.78215100  | 2.51457300  |
| Cd | -2.22536800 | 0.92992900  | 1.98376800  |
| Cd | 0.30734100  | -2.39219000 | 1.98376800  |
| Se | -2.19611400 | -1.76052000 | 2.51457300  |
| Cd | -3.12758100 | -1.62536700 | 0.00000000  |
| Se | -2.19611400 | -1.76052000 | -2.51457300 |
| Cd | 0.30734100  | -2.39219000 | -1.98376800 |
| Cd | -2.22536800 | 0.92992900  | -1.98376800 |
| Se | 2.62271200  | -1.02163100 | -2.51457300 |
| Cd | 1.91802600  | 1.46226000  | -1.98376800 |
| Se | 1.18945800  | -3.97579700 | 0.00000000  |
| Se | -4.03787000 | 0.95779800  | 0.00000000  |
| Cd | 0.15618100  | 3.52124800  | 0.00000000  |
| Cd | 2.97139900  | -1.89588100 | 0.00000000  |
| Se | -0.42659800 | 2.78215100  | -2.51457300 |

(CdSe)<sub>10</sub>

|    |             |             |             |
|----|-------------|-------------|-------------|
| Cd | 0.00000000  | 3.51478300  | 0.37104200  |
| Se | 2.16896300  | 3.83958800  | -1.16587900 |
| Cd | 2.10136800  | 1.31037500  | -2.06277300 |
| Se | 0.00000000  | 0.00000000  | -3.08893600 |
| Cd | -2.18550300 | 1.16465100  | -2.06277300 |
| Se | -2.43969900 | 3.47186500  | -0.58988300 |
| Se | 4.22657200  | 0.37690900  | -0.58988300 |
| Cd | 3.04389100  | -1.75739100 | 0.37104200  |
| Se | 2.24069900  | -3.79817100 | -1.16587900 |
| Cd | 0.08413400  | -2.47502600 | -2.06277300 |
| Se | -4.40966200 | -0.04141700 | -1.16587900 |
| Cd | -3.04389100 | -1.75739100 | 0.37104200  |
| Se | -1.78687400 | -3.84877300 | -0.58988300 |
| Cd | 3.09677100  | 2.28350600  | 0.90237400  |
| Cd | 0.42918900  | -3.82363500 | 0.90237400  |
| Cd | -3.52596000 | 1.54012900  | 0.90237400  |
| Cd | 0.00000000  | 0.00000000  | 2.67337600  |
| Se | 1.07449600  | 2.45403100  | 2.64173600  |
| Se | -2.66250200 | -0.29647500 | 2.64173600  |
| Se | 1.58800500  | -2.15755700 | 2.64173600  |

(CdSe)<sub>13</sub>

|    |             |             |             |
|----|-------------|-------------|-------------|
| Se | 3.61722500  | 2.41316900  | -1.47899900 |
| Se | 3.73330700  | -2.39039600 | -1.20470700 |
| Se | 3.61736600  | 0.24765600  | 2.81865100  |
| Cd | 2.91163500  | -0.00396700 | -2.25247300 |
| Cd | 2.81673800  | 2.08918400  | 1.11381300  |
| Cd | 2.91545000  | -1.87397400 | 1.24561800  |
| Cd | 1.15921300  | 3.44370000  | -1.40043000 |
| Cd | 1.19168400  | -0.45057500 | 3.67730700  |
| Cd | 1.32646000  | -2.90032100 | -2.23249000 |
| Se | 0.85924100  | 3.99035700  | 1.23436700  |
| Se | 1.01286700  | -3.01829900 | 2.83643500  |
| Se | 1.04465500  | -0.89920200 | -4.03414500 |
| Se | -0.90111600 | 3.33602000  | -3.10803900 |
| Se | -0.73125500 | -4.38080200 | -1.36960200 |
| Se | -0.93687400 | 0.98158600  | 4.44503500  |
| Cd | -0.81148600 | 0.57822200  | -2.80974800 |
| Cd | -0.77420700 | -2.74513500 | 0.87231500  |
| Cd | -0.90873900 | 2.10692600  | 1.90779600  |
| Se | -0.19755000 | -0.00368900 | -0.00131500 |
| Se | -3.44947200 | -0.35870400 | -2.74888700 |
| Se | -3.56578500 | 2.39363800  | 1.07325400  |
| Se | -3.45422800 | -2.29444400 | 1.54675600  |
| Cd | -2.43481100 | 3.28445000  | -1.04634600 |
| Cd | -2.27046200 | -2.60943200 | -2.41802000 |
| Cd | -2.38606400 | -0.85162800 | 3.37506400  |
| Cd | -3.19468200 | -0.07941600 | -0.03864300 |

(CdSe)<sub>16</sub>

|    |             |             |             |
|----|-------------|-------------|-------------|
| Se | -4.65917700 | 1.41325200  | 1.41325200  |
| Se | -4.65917700 | -1.41325200 | -1.41325200 |
| Se | -2.87413000 | 2.87413000  | -2.87413000 |
| Se | -1.41325200 | -1.41325200 | -4.65917700 |
| Se | 1.41325200  | 1.41325200  | -4.65917700 |
| Se | 2.87413000  | -2.87413000 | -2.87413000 |
| Se | -1.41325200 | -4.65917700 | -1.41325200 |
| Se | 1.41325200  | -4.65917700 | 1.41325200  |
| Se | -2.87413000 | -2.87413000 | 2.87413000  |
| Se | -1.41325200 | 1.41325200  | 4.65917700  |
| Se | -1.41325200 | 4.65917700  | 1.41325200  |
| Se | 2.87413000  | 2.87413000  | 2.87413000  |
| Se | 1.41325200  | -1.41325200 | 4.65917700  |
| Se | 4.65917700  | -1.41325200 | 1.41325200  |

|    |             |             |             |
|----|-------------|-------------|-------------|
| Se | 4.65917700  | 1.41325200  | -1.41325200 |
| Se | 1.41325200  | 4.65917700  | -1.41325200 |
| Cd | -1.21597700 | 4.13217600  | -1.21597700 |
| Cd | 1.21597700  | 4.13217600  | 1.21597700  |
| Cd | -2.52224500 | 2.52224500  | 2.52224500  |
| Cd | 1.21597700  | 1.21597700  | 4.13217600  |
| Cd | -4.13217600 | 1.21597700  | -1.21597700 |
| Cd | -4.13217600 | -1.21597700 | 1.21597700  |
| Cd | -1.21597700 | -1.21597700 | 4.13217600  |
| Cd | -1.21597700 | -4.13217600 | 1.21597700  |
| Cd | 2.52224500  | -2.52224500 | 2.52224500  |
| Cd | 4.13217600  | 1.21597700  | 1.21597700  |
| Cd | -2.52224500 | -2.52224500 | -2.52224500 |
| Cd | 2.52224500  | 2.52224500  | -2.52224500 |
| Cd | -1.21597700 | 1.21597700  | -4.13217600 |
| Cd | 1.21597700  | -1.21597700 | -4.13217600 |
| Cd | 1.21597700  | -4.13217600 | -1.21597700 |
| Cd | 4.13217600  | -1.21597700 | -1.21597700 |

(CdSe)<sub>19</sub>

|    |             |             |             |
|----|-------------|-------------|-------------|
| Cd | 0.00000000  | 0.00000000  | 3.29045600  |
| Se | 2.61221800  | -0.56176100 | 3.44729900  |
| Se | -1.79260900 | -1.98136700 | 3.44729900  |
| Cd | -3.28892700 | 2.72840400  | 2.54391500  |
| Cd | -3.98378900 | -1.47165300 | 1.99488500  |
| Cd | -0.71840400 | -4.21249700 | 2.54391500  |
| Cd | 3.26638300  | -2.71423600 | 1.99488500  |
| Cd | 0.71740600  | 4.18588900  | 1.99488500  |
| Cd | 4.00733100  | 1.48409200  | 2.54391500  |
| Se | 3.34461800  | 4.06917900  | 2.28528800  |
| Se | -5.19632100 | 0.86193500  | 2.28528800  |
| Se | 1.85170300  | -4.93111400 | 2.28528800  |
| Se | -0.81961000 | 2.54312800  | 3.44729900  |
| Se | 0.00000000  | 5.97150800  | 0.16742400  |
| Se | -4.42043900 | 4.41318200  | 0.73685900  |
| Cd | -2.35003700 | 5.02416600  | -0.73478800 |
| Se | -5.17147800 | -2.98575400 | 0.16742400  |
| Se | -1.61170800 | -6.03480300 | 0.73685900  |
| Se | 5.17147800  | -2.98575400 | 0.16742400  |
| Cd | -3.17603700 | -4.54727500 | -0.73478800 |
| Cd | 5.52607400  | -0.47689100 | -0.73478800 |
| Cd | 0.85310400  | -5.39191900 | -0.16939200 |
| Cd | 4.24298700  | 3.43476900  | -0.16939200 |
| Cd | -5.09609000 | 1.95715000  | -0.16939200 |

|    |             |             |             |
|----|-------------|-------------|-------------|
| Se | 6.03214700  | 1.62162100  | 0.73685900  |
| Se | 1.47542300  | -4.46886400 | -2.58321800 |
| Cd | 3.58319700  | -2.98992800 | -2.00136500 |
| Se | -4.60786100 | 0.95667900  | -2.58321800 |
| Cd | -4.38095200 | -1.60817600 | -2.00136500 |
| Se | 3.13243900  | 3.51218600  | -2.58321800 |
| Cd | 0.79775500  | 4.59810400  | -2.00136500 |
| Cd | -0.42072400 | -2.57370300 | -2.81517700 |
| Se | -2.86814900 | -3.47984700 | -3.20967700 |
| Se | 4.44771000  | -0.74396600 | -3.20967700 |
| Cd | 2.43925500  | 0.92249400  | -2.81517700 |
| Se | -1.57956200 | 4.22381300  | -3.20967700 |
| Cd | -2.01853000 | 1.65121000  | -2.81517700 |
| Se | 0.00000000  | 0.00000000  | -2.17148300 |



### Cartesian coordinates of CdSe cluster in toluene

#### (CdSe)<sub>1</sub>

|    |            |            |             |
|----|------------|------------|-------------|
| Se | 0.00000000 | 0.00000000 | -1.44075700 |
| Cd | 0.00000000 | 0.00000000 | 1.02460400  |

#### (CdSe)<sub>2</sub>

|    |             |             |             |
|----|-------------|-------------|-------------|
| Cd | 0.00049600  | -1.51747500 | 0.00000100  |
| Cd | -0.00048900 | 1.51747900  | 0.00000100  |
| Se | -2.16666100 | -0.00071200 | -0.00000100 |
| Se | 2.16666600  | 0.00071700  | -0.00000100 |

#### (CdSe)<sub>3</sub>

|    |             |             |            |
|----|-------------|-------------|------------|
| Cd | 0.00000000  | 2.03231000  | 0.00000000 |
| Cd | 1.80276700  | -1.02434500 | 0.00000000 |
| Cd | -1.80276700 | -1.02434500 | 0.00000000 |
| Se | 0.00000000  | -2.91241400 | 0.00000000 |
| Se | 2.53713000  | 1.46439800  | 0.00000000 |
| Se | -2.53713000 | 1.46439800  | 0.00000000 |

#### (CdSe)<sub>4</sub>

|    |             |             |             |
|----|-------------|-------------|-------------|
| Se | -1.52774900 | 1.52770700  | 1.52775200  |
| Se | 1.52773400  | 1.52777500  | -1.52780100 |
| Se | -1.52774900 | -1.52770700 | -1.52775200 |
| Cd | 1.19645000  | 1.19642600  | 1.19640600  |
| Cd | -1.19643500 | -1.19645900 | 1.19646500  |
| Cd | -1.19643500 | 1.19645900  | -1.19646500 |
| Cd | 1.19645000  | -1.19642600 | -1.19640600 |
| Se | 1.52773400  | -1.52777500 | 1.52780100  |

#### (CdSe)<sub>5</sub>

|    |             |             |             |
|----|-------------|-------------|-------------|
| Cd | 2.61642700  | 1.35698700  | 0.00002500  |
| Cd | 1.43480900  | -1.73781200 | 0.00000000  |
| Cd | -1.05155500 | 1.03378100  | 1.64269700  |
| Se | -0.37868900 | -1.56786800 | 2.10138600  |
| Se | 3.94638800  | -0.81984400 | -0.00002500 |
| Se | 0.40678700  | 2.75322200  | 0.00000200  |
| Se | -0.37869200 | -1.56788100 | -2.10138200 |
| Se | -3.28458200 | 0.83658600  | -0.00000600 |
| Cd | -2.20266700 | -1.66349100 | 0.00000300  |
| Cd | -1.05153800 | 1.03377500  | -1.64270000 |

#### (CdSe)<sub>6</sub>

|    |            |            |            |
|----|------------|------------|------------|
| Cd | 0.00000000 | 2.25993400 | 1.16810000 |
|----|------------|------------|------------|

|    |             |             |             |
|----|-------------|-------------|-------------|
| Cd | 2.09501600  | -1.19074800 | 1.26248600  |
| Cd | -2.09501600 | -1.19074800 | 1.26248600  |
| Se | 2.52132000  | 1.43707400  | 1.57201000  |
| Se | -2.52132000 | 1.43707400  | 1.57201000  |
| Se | 0.00000000  | -2.88758100 | 1.55419800  |
| Se | 0.00000000  | 2.88758100  | -1.55419800 |
| Se | 2.52132000  | -1.43707400 | -1.57201000 |
| Se | -2.52132000 | -1.43707400 | -1.57201000 |
| Cd | 2.09501600  | 1.19074800  | -1.26248600 |
| Cd | -2.09501600 | 1.19074800  | -1.26248600 |
| Cd | 0.00000000  | -2.25993400 | -1.16810000 |

(CdSe)<sub>7</sub>

|    |             |             |             |
|----|-------------|-------------|-------------|
| Se | 2.69312800  | 0.23038700  | -2.47356400 |
| Se | 2.61964300  | 2.01182600  | 1.43568600  |
| Cd | 1.26365400  | 2.01077600  | -0.96491000 |
| Cd | 3.86003500  | 0.01692100  | 0.00790000  |
| Se | -4.39798700 | 0.00719800  | 0.00207900  |
| Se | -1.34447100 | 2.60836800  | -1.16811700 |
| Cd | -2.41403900 | 1.56819200  | 1.12735400  |
| Cd | -2.44869500 | 0.19411900  | -1.92709200 |
| Cd | 1.29273800  | -1.84232600 | -1.34089600 |
| Cd | -2.45963600 | -1.76392000 | 0.83066100  |
| Cd | 1.24126900  | -0.21993900 | 2.22034100  |
| Se | -1.36987900 | -0.29016000 | 2.86618900  |
| Se | -1.31957800 | -2.28953200 | -1.62568300 |
| Se | 2.64793700  | -2.24187600 | 1.00985300  |

(CdSe)<sub>8</sub>

|    |             |             |             |
|----|-------------|-------------|-------------|
| Se | -3.64532700 | -1.94613600 | 0.85678500  |
| Cd | -3.22251200 | -0.74532100 | -1.51107000 |
| Se | -1.03376200 | -0.43375000 | -3.09812900 |
| Cd | 1.04997900  | -1.68502100 | -1.94675600 |
| Se | 1.03376200  | -3.09813000 | 0.43374900  |
| Cd | -1.04997800 | -1.94675600 | 1.68502100  |
| Se | -1.03375700 | 0.43374800  | 3.09812900  |
| Cd | -3.22251100 | 0.74531900  | 1.51107600  |
| Se | -3.64533000 | 1.94613300  | -0.85677900 |
| Cd | -1.04998200 | 1.94675400  | -1.68502100 |
| Se | 1.03375800  | 3.09813000  | -0.43375000 |
| Cd | 1.04998100  | 1.68502200  | 1.94675400  |
| Se | 3.64532700  | -0.85678000 | -1.94613700 |
| Cd | 3.22251100  | -1.51107100 | 0.74531800  |
| Se | 3.64532900  | 0.85678400  | 1.94613200  |

|                      |             |             |             |
|----------------------|-------------|-------------|-------------|
| Cd                   | 3.22251000  | 1.51107500  | -0.74532200 |
| (CdSe) <sub>9</sub>  |             |             |             |
| Se                   | 2.87450700  | 2.98843100  | 0.00000000  |
| Cd                   | 1.94603800  | 1.48403000  | 2.06564800  |
| Se                   | 2.66162200  | -1.05059400 | 2.52269300  |
| Se                   | -0.43805300 | 2.79534000  | 2.50953500  |
| Cd                   | -2.33225600 | 0.99411100  | 1.99128000  |
| Cd                   | 0.34838300  | -2.48216500 | 2.03895900  |
| Se                   | -2.17363500 | -1.72904700 | 2.50197600  |
| Cd                   | -3.20836000 | -1.66688000 | 0.00000000  |
| Se                   | -2.17363500 | -1.72904700 | -2.50197600 |
| Cd                   | 0.34838300  | -2.48216500 | -2.03895900 |
| Cd                   | -2.33225600 | 0.99411100  | -1.99128000 |
| Se                   | 2.66162200  | -1.05059400 | -2.52269300 |
| Cd                   | 1.94603800  | 1.48403000  | -2.06564800 |
| Se                   | 1.21464400  | -4.02141000 | 0.00000000  |
| Se                   | -4.17294700 | 0.96906400  | 0.00000000  |
| Cd                   | 0.18150000  | 3.63335000  | 0.00000000  |
| Cd                   | 3.08645500  | -1.92590600 | 0.00000000  |
| Se                   | -0.43805300 | 2.79534000  | -2.50953500 |
| (CdSe) <sub>10</sub> |             |             |             |
| Cd                   | -0.00311500 | 3.62880900  | 0.31718800  |
| Se                   | 2.23879500  | 3.93829500  | -1.18163400 |
| Cd                   | 2.24554500  | 1.38912900  | -2.13994200 |
| Se                   | 0.02872200  | -0.01154400 | -2.84806800 |
| Cd                   | -2.25187700 | 1.21107100  | -2.07785800 |
| Se                   | -2.50543700 | 3.53045100  | -0.57628100 |
| Se                   | 4.25717000  | 0.39380200  | -0.53491800 |
| Cd                   | 3.08480400  | -1.82803500 | 0.31100000  |
| Se                   | 2.28055000  | -3.91769000 | -1.21073000 |
| Cd                   | 0.07096700  | -2.63583600 | -2.13524300 |
| Se                   | -4.47630100 | -0.04348000 | -1.16846200 |
| Cd                   | -3.10334700 | -1.79794500 | 0.37465900  |
| Se                   | -1.81624600 | -3.92151400 | -0.56318000 |
| Cd                   | 3.15353700  | 2.36579000  | 0.94435900  |
| Cd                   | 0.46130400  | -3.98416400 | 0.88011500  |
| Cd                   | -3.62269600 | 1.58946400  | 0.92997100  |
| Cd                   | 0.01757400  | 0.02480700  | 2.70304800  |
| Se                   | 1.04648700  | 2.53619100  | 2.62751700  |
| Se                   | -2.67533300 | -0.28696600 | 2.63555800  |
| Se                   | 1.56889300  | -2.18063300 | 2.58719100  |

(CdSe)<sub>13</sub>

|    |             |             |             |
|----|-------------|-------------|-------------|
| Se | 3.62994600  | 2.46701900  | -1.48736300 |
| Se | 3.82618500  | -2.38948500 | -1.24168300 |
| Se | 3.69052700  | 0.23782000  | 2.85133200  |
| Cd | 3.06506700  | 0.00987300  | -2.35261700 |
| Cd | 2.95469700  | 2.17062200  | 1.17252100  |
| Cd | 3.13243700  | -1.97407900 | 1.29679000  |
| Cd | 1.15715100  | 3.52415500  | -1.39112100 |
| Cd | 1.24507500  | -0.53901600 | 3.73574000  |
| Cd | 1.34922000  | -2.91682100 | -2.17115100 |
| Se | 0.92050800  | 4.03367000  | 1.28573200  |
| Se | 1.08954400  | -3.07440000 | 2.77844300  |
| Se | 1.09776400  | -0.91559600 | -4.03300400 |
| Se | -0.91431100 | 3.36234000  | -3.10769300 |
| Se | -0.73702100 | -4.40921800 | -1.36218100 |
| Se | -0.87255900 | 0.94922400  | 4.46341000  |
| Cd | -0.85994300 | 0.56549900  | -2.89093000 |
| Cd | -0.86552900 | -2.76651300 | 0.92456400  |
| Cd | -0.92848100 | 2.13413500  | 1.91769700  |
| Se | -0.35627100 | -0.00484400 | -0.01739400 |
| Se | -3.49170300 | -0.44356800 | -2.84277700 |
| Se | -3.61005000 | 2.44382300  | 1.05316000  |
| Se | -3.55543400 | -2.24823800 | 1.62896600  |
| Cd | -2.57293100 | 3.46083000  | -1.10592600 |
| Cd | -2.36904000 | -2.77688400 | -2.57303300 |
| Cd | -2.56033600 | -0.81622400 | 3.54988200  |
| Cd | -3.27540200 | -0.07919900 | -0.07879600 |

(CdSe)<sub>16</sub>

|    |             |             |             |
|----|-------------|-------------|-------------|
| Se | -4.75084400 | 1.43227100  | 1.43227100  |
| Se | -4.75084400 | -1.43227100 | -1.43227100 |
| Se | -2.87427600 | 2.87427600  | -2.87427600 |
| Se | -1.43227100 | -1.43227100 | -4.75084400 |
| Se | 1.43227100  | 1.43227100  | -4.75084400 |
| Se | 2.87427600  | -2.87427600 | -2.87427600 |
| Se | -1.43227100 | -4.75084400 | -1.43227100 |
| Se | 1.43227100  | -4.75084400 | 1.43227100  |
| Se | -2.87427600 | -2.87427600 | 2.87427600  |
| Se | -1.43227100 | 1.43227100  | 4.75084400  |
| Se | -1.43227100 | 4.75084400  | 1.43227100  |
| Se | 2.87427600  | 2.87427600  | 2.87427600  |
| Se | 1.43227100  | -1.43227100 | 4.75084400  |
| Se | 4.75084400  | -1.43227100 | 1.43227100  |
| Se | 4.75084400  | 1.43227100  | -1.43227100 |

|    |             |             |             |
|----|-------------|-------------|-------------|
| Se | 1.43227100  | 4.75084400  | -1.43227100 |
| Cd | -1.23742900 | 4.22641200  | -1.23742900 |
| Cd | 1.23742900  | 4.22641200  | 1.23742900  |
| Cd | -2.64886800 | 2.64886800  | 2.64886800  |
| Cd | 1.23742900  | 1.23742900  | 4.22641200  |
| Cd | -4.22641200 | 1.23742900  | -1.23742900 |
| Cd | -4.22641200 | -1.23742900 | 1.23742900  |
| Cd | -1.23742900 | -1.23742900 | 4.22641200  |
| Cd | -1.23742900 | -4.22641200 | 1.23742900  |
| Cd | 2.64886800  | -2.64886800 | 2.64886800  |
| Cd | 4.22641200  | 1.23742900  | 1.23742900  |
| Cd | -2.64886800 | -2.64886800 | -2.64886800 |
| Cd | 2.64886800  | 2.64886800  | -2.64886800 |
| Cd | -1.23742900 | 1.23742900  | -4.22641200 |
| Cd | 1.23742900  | -1.23742900 | -4.22641200 |
| Cd | 1.23742900  | -4.22641200 | -1.23742900 |
| Cd | 4.22641200  | -1.23742900 | -1.23742900 |

(CdSe)<sub>19</sub>

|    |             |             |             |
|----|-------------|-------------|-------------|
| Cd | 0.00924200  | 0.00148700  | 3.33465100  |
| Se | 2.65290400  | -0.49715300 | 3.37885000  |
| Se | -1.85604200 | -1.97273200 | 3.35433100  |
| Cd | -3.43253600 | 2.73834500  | 2.65419400  |
| Cd | -4.19359100 | -1.51646400 | 2.05291600  |
| Cd | -0.76957100 | -4.27620100 | 2.56939300  |
| Cd | 3.33748600  | -2.74345900 | 2.04816600  |
| Cd | 0.77417000  | 4.30930800  | 2.03843100  |
| Cd | 4.13625800  | 1.60312100  | 2.63437500  |
| Se | 3.45814100  | 4.20101200  | 2.27407800  |
| Se | -5.37486400 | 0.87255900  | 2.33152200  |
| Se | 1.85615800  | -4.95627300 | 2.33932200  |
| Se | -0.84100200 | 2.58202800  | 3.35007600  |
| Se | 0.00865900  | 6.06318800  | 0.15440300  |
| Se | -4.45183400 | 4.43384700  | 0.74046700  |
| Cd | -2.39127500 | 5.14389800  | -0.76330200 |
| Se | -5.24280700 | -3.08772400 | 0.13410000  |
| Se | -1.58129600 | -6.05706000 | 0.66173000  |
| Se | 5.18131900  | -3.03875500 | 0.11766700  |
| Cd | -3.27398500 | -4.70682900 | -0.86056900 |
| Cd | 5.67542200  | -0.51879900 | -0.77936400 |
| Cd | 0.95730600  | -5.48293600 | -0.16974800 |
| Cd | 4.40720300  | 3.51154400  | -0.19153900 |
| Cd | -5.27467100 | 1.98469700  | -0.15867700 |
| Se | 6.13431900  | 1.61023800  | 0.73733900  |

|    |             |             |             |
|----|-------------|-------------|-------------|
| Se | 1.49600400  | -4.55988000 | -2.63658400 |
| Cd | 3.64103200  | -3.06107400 | -2.10734300 |
| Se | -4.58070400 | 0.96940200  | -2.53939900 |
| Cd | -4.51153800 | -1.63923200 | -2.02356400 |
| Se | 3.12553700  | 3.50596200  | -2.56580200 |
| Cd | 0.81903600  | 4.75200500  | -2.08100000 |
| Cd | -0.43948200 | -2.62432800 | -2.74817400 |
| Se | -2.92869000 | -3.45825500 | -3.27296700 |
| Se | 4.50377500  | -0.75522600 | -3.25686700 |
| Cd | 2.45613200  | 0.88143500  | -2.78100800 |
| Se | -1.57326200 | 4.22525800  | -3.23247800 |
| Cd | -1.94629700 | 1.62548600  | -2.71119100 |
| Se | 0.03334500  | -0.06243600 | -1.92130300 |

### Cartesian coordinates of CdSe cluster in water

#### (CdSe)<sub>1</sub>

|    |            |            |             |
|----|------------|------------|-------------|
| Cd | 0.00000000 | 0.00000000 | 1.05923300  |
| Se | 0.00000000 | 0.00000000 | -1.49538700 |

#### (CdSe)<sub>2</sub>

|    |             |             |            |
|----|-------------|-------------|------------|
| Cd | -0.00003900 | -1.57566200 | 0.00000000 |
| Cd | 0.00000000  | 1.57538200  | 0.00000000 |
| Se | -2.20415500 | -0.00211500 | 0.00000000 |
| Se | 2.20421000  | 0.00250900  | 0.00000000 |

#### (CdSe)<sub>3</sub>

|    |            |             |             |
|----|------------|-------------|-------------|
| Cd | 0.00000000 | 0.00000000  | 1.99869100  |
| Cd | 0.00000000 | 1.81321500  | -1.01811300 |
| Cd | 0.00000000 | -1.81321500 | -1.01811300 |
| Se | 0.00000000 | 0.00000000  | -2.97842900 |
| Se | 0.00000000 | 2.59970400  | 1.51571000  |
| Se | 0.00000000 | -2.59970400 | 1.51571000  |

#### (CdSe)<sub>4</sub>

|    |             |             |            |
|----|-------------|-------------|------------|
| Cd | -2.68044600 | -0.00120400 | 0.00000000 |
| Cd | 2.68240100  | 0.00125400  | 0.00000000 |
| Cd | 0.00000000  | 2.68017400  | 0.00000000 |
| Cd | -0.00077800 | -2.68030400 | 0.00000000 |
| Se | -2.63034500 | 2.62883300  | 0.00000000 |
| Se | 2.62995400  | 2.63171100  | 0.00000000 |
| Se | -2.63079400 | -2.63142200 | 0.00000000 |
| Se | 2.62952200  | -2.62901000 | 0.00000000 |

#### (CdSe)<sub>5</sub>

|    |             |             |             |
|----|-------------|-------------|-------------|
| Cd | 2.60815500  | 1.41368800  | -0.00155400 |
| Cd | 1.48263600  | -1.54562600 | 0.03666800  |
| Cd | -1.03010800 | 1.18847200  | 1.49846900  |
| Se | -0.28943800 | -1.38015900 | 2.24263800  |
| Se | 4.09341400  | -0.74787000 | 0.06244200  |
| Se | 0.34909700  | 2.80798600  | -0.33645500 |
| Se | -0.34381900 | -1.79649900 | -2.10308500 |
| Se | -3.45429100 | 0.83366100  | 0.11838700  |
| Cd | -2.14632000 | -1.65630500 | 0.14470100  |
| Cd | -1.16579500 | 0.80014500  | -1.66689800 |

#### (CdSe)<sub>6</sub>

|    |             |             |            |
|----|-------------|-------------|------------|
| Cd | -1.16359800 | -1.11786600 | 2.02612600 |
|----|-------------|-------------|------------|

|    |             |             |             |
|----|-------------|-------------|-------------|
| Cd | 2.31499800  | -1.17433900 | -0.05642300 |
| Cd | -1.15931800 | -1.15171000 | -2.17600200 |
| Cd | 1.15931800  | 1.15171000  | 2.17600200  |
| Cd | -2.31499800 | 1.17433900  | 0.05642400  |
| Cd | 1.16359800  | 1.11786600  | -2.02612600 |
| Se | 1.48362000  | -1.74404500 | 2.50395000  |
| Se | -2.88349600 | -1.65655500 | -0.08611300 |
| Se | 1.47815900  | -1.78984100 | -2.61845400 |
| Se | -1.47815900 | 1.78984100  | 2.61845400  |
| Se | 2.88349500  | 1.65655500  | 0.08611300  |
| Se | -1.48362000 | 1.74404500  | -2.50395000 |

(CdSe)<sub>7</sub>

|    |             |             |             |
|----|-------------|-------------|-------------|
| Se | -1.60489000 | -3.61727000 | -0.02000000 |
| Se | -2.58624000 | -0.33824000 | 2.50147000  |
| Cd | -0.53645000 | -2.15830000 | 1.91695000  |
| Cd | -3.07692000 | -1.20606000 | 0.04500000  |
| Se | 4.46380000  | 2.02764000  | 0.04000000  |
| Se | 1.54228000  | -0.55955000 | 2.33404000  |
| Cd | -0.53995000 | 1.20094000  | -1.83239000 |
| Cd | 2.82497000  | -0.05963000 | -0.02000000 |
| Cd | -0.53995000 | -2.12830000 | -1.93195000 |
| Cd | 2.22705000  | 3.16575000  | -0.26000000 |
| Cd | -0.49995000 | 1.19594000  | 1.81239000  |
| Se | -0.39022000 | 3.20122000  | 0.03000000  |
| Se | 1.49828000  | -0.45955000 | -2.34404000 |
| Se | -2.67624000 | -0.32824000 | -2.43147000 |

(CdSe)<sub>8</sub>

|    |             |             |             |
|----|-------------|-------------|-------------|
| Se | 0.76766900  | 2.05933300  | 3.63307900  |
| Cd | 1.58970900  | -0.50737400 | 3.10802000  |
| Se | 2.61188600  | -1.97589100 | 1.01443500  |
| Cd | 2.61188600  | -0.09677800 | -0.97081000 |
| Se | 1.97589100  | 2.61188600  | -1.01443500 |
| Cd | 0.09677800  | 2.61188600  | 0.97081000  |
| Se | -2.61188600 | 1.97589100  | 1.01443500  |
| Cd | -1.58970900 | 0.50737400  | 3.10802000  |
| Se | -0.76766900 | -2.05933300 | 3.63307900  |
| Cd | -0.09677800 | -2.61188600 | 0.97081000  |
| Se | -1.97589100 | -2.61188600 | -1.01443500 |
| Cd | -2.61188600 | 0.09677800  | -0.97081000 |
| Se | 2.05933300  | -0.76766900 | -3.63307900 |
| Cd | 0.50737400  | 1.58970900  | -3.10802000 |
| Se | -2.05933300 | 0.76766900  | -3.63307900 |



|                      |             |             |             |
|----------------------|-------------|-------------|-------------|
| Cd                   | -0.50737400 | -1.58970900 | -3.10802000 |
| (CdSe) <sub>9</sub>  |             |             |             |
| Se                   | 2.94501500  | 3.04690500  | 0.00000000  |
| Cd                   | 1.87663000  | 1.47945700  | 2.02671600  |
| Se                   | 2.67401800  | -1.06489800 | 2.58111800  |
| Se                   | -0.46645500 | 2.91581100  | 2.57886200  |
| Cd                   | -2.23278800 | 0.97847000  | 1.91419100  |
| Cd                   | 0.32946100  | -2.53596200 | 1.96648400  |
| Se                   | -2.21491600 | -1.74015600 | 2.56887300  |
| Cd                   | -3.22692100 | -1.68738100 | 0.00000000  |
| Se                   | -2.21491600 | -1.74015600 | -2.56887300 |
| Cd                   | 0.32946100  | -2.53596200 | -1.96648400 |
| Cd                   | -2.23278800 | 0.97847000  | -1.91419100 |
| Se                   | 2.67401800  | -1.06489800 | -2.58111800 |
| Cd                   | 1.87663000  | 1.47945700  | -2.02671600 |
| Se                   | 1.29861400  | -4.20743000 | 0.00000000  |
| Se                   | -4.21513100 | 0.98627500  | 0.00000000  |
| Cd                   | 0.18335900  | 3.69511600  | 0.00000000  |
| Cd                   | 3.08316200  | -1.89893100 | 0.00000000  |
| Se                   | -0.46645500 | 2.91581100  | -2.57886200 |
| (CdSe) <sub>10</sub> |             |             |             |
| Cd                   | 0.30323800  | 3.56855000  | 0.33639500  |
| Se                   | 2.64670600  | 3.84873200  | -1.15021800 |
| Cd                   | 2.19775500  | 1.22824000  | -2.02343400 |
| Se                   | 0.04350200  | 0.01393300  | -3.24213900 |
| Cd                   | -2.10648900 | 1.25686000  | -2.06356100 |
| Se                   | -2.18342600 | 3.71384100  | -0.71834200 |
| Se                   | 4.37151200  | 0.01503700  | -0.65370100 |
| Cd                   | 2.96480600  | -2.05857200 | 0.39659200  |
| Se                   | 1.99182600  | -4.02698200 | -1.29195600 |
| Cd                   | -0.16926900 | -2.44784000 | -2.06515800 |
| Se                   | -4.55264800 | 0.22393100  | -1.19569700 |
| Cd                   | -3.22487900 | -1.52087500 | 0.47595800  |
| Se                   | -2.16250300 | -3.77590600 | -0.57821000 |
| Cd                   | 3.33360200  | 2.03095300  | 0.90268400  |
| Cd                   | 0.15883300  | -4.01865600 | 0.86773300  |
| Cd                   | -3.54206100 | 1.92341100  | 0.87690400  |
| Cd                   | -0.01097500 | -0.02966500 | 2.87364000  |
| Se                   | 1.28585200  | 2.40680900  | 2.67963700  |
| Se                   | -2.76970800 | 0.04584700  | 2.72029700  |
| Se                   | 1.42432300  | -2.39764700 | 2.69571600  |

(CdSe)<sub>13</sub>

|    |             |             |             |
|----|-------------|-------------|-------------|
| Se | -3.60390500 | -1.34766000 | -2.74429200 |
| Se | -3.39610600 | 3.14546100  | -0.96286600 |
| Se | -4.12045000 | -0.70025600 | 2.17313100  |
| Cd | -2.51930100 | 1.15125500  | -2.72753500 |
| Cd | -3.23853600 | -1.99896300 | -0.03288300 |
| Cd | -3.09891400 | 1.82508800  | 1.39841100  |
| Cd | -1.17745100 | -2.71805500 | -2.68402800 |
| Cd | -1.70342100 | -0.47667200 | 3.52120600  |
| Cd | -0.70184400 | 3.72909100  | -1.40369000 |
| Se | -1.42998200 | -4.10484100 | -0.28862200 |
| Se | -1.39661400 | 2.27080600  | 3.58639200  |
| Se | -0.21534000 | 2.28379400  | -3.75502100 |
| Se | 1.13560400  | -2.23464200 | -4.07434500 |
| Se | 1.23508100  | 4.53333300  | 0.34485800  |
| Se | -0.03720100 | -2.59652100 | 3.99824500  |
| Cd | 1.31097900  | 0.22431700  | -2.65851900 |
| Cd | 0.82381100  | 2.18043600  | 1.92585200  |
| Cd | 0.46016900  | -2.70756700 | 1.20367200  |
| Se | 0.29856700  | -0.00677100 | 0.07681200  |
| Se | 4.04580600  | 0.75876200  | -1.98745500 |
| Se | 3.19400600  | -3.13996800 | 0.61971500  |
| Se | 3.35532400  | 1.18418300  | 2.86370400  |
| Cd | 2.44696500  | -3.13595200 | -1.94116400 |
| Cd | 2.98090400  | 2.97649800  | -0.94262200 |
| Cd | 1.92653700  | -0.75240700 | 3.97556200  |
| Cd | 3.17084600  | -0.30735600 | 0.48071900  |

(CdSe)<sub>16</sub>

|    |             |             |             |
|----|-------------|-------------|-------------|
| Se | -4.84473100 | 1.47272400  | 1.47272400  |
| Se | -4.84473100 | -1.47272400 | -1.47272400 |
| Se | -2.92408700 | 2.92408700  | -2.92408700 |
| Se | -1.47272400 | -1.47272400 | -4.84473100 |
| Se | 1.47272400  | 1.47272400  | -4.84473100 |
| Se | 2.92408700  | -2.92408700 | -2.92408700 |
| Se | -1.47272400 | -4.84473100 | -1.47272400 |
| Se | 1.47272400  | -4.84473100 | 1.47272400  |
| Se | -2.92408700 | -2.92408700 | 2.92408700  |
| Se | -1.47272400 | 1.47272400  | 4.84473100  |
| Se | -1.47272400 | 4.84473100  | 1.47272400  |
| Se | 2.92408700  | 2.92408700  | 2.92408700  |
| Se | 1.47272400  | -1.47272400 | 4.84473100  |
| Se | 4.84473100  | -1.47272400 | 1.47272400  |
| Se | 4.84473100  | 1.47272400  | -1.47272400 |

|    |             |             |             |
|----|-------------|-------------|-------------|
| Se | 1.47272400  | 4.84473100  | -1.47272400 |
| Cd | -1.23620100 | 4.23332800  | -1.23620100 |
| Cd | 1.23620100  | 4.23332800  | 1.23620100  |
| Cd | -2.68698600 | 2.68698600  | 2.68698600  |
| Cd | 1.23620100  | 1.23620100  | 4.23332800  |
| Cd | -4.23332800 | 1.23620100  | -1.23620100 |
| Cd | -4.23332800 | -1.23620100 | 1.23620100  |
| Cd | -1.23620100 | -1.23620100 | 4.23332800  |
| Cd | -1.23620100 | -4.23332800 | 1.23620100  |
| Cd | 2.68698600  | -2.68698600 | 2.68698600  |
| Cd | 4.23332800  | 1.23620100  | 1.23620100  |
| Cd | -2.68698600 | -2.68698600 | -2.68698600 |
| Cd | 2.68698600  | 2.68698600  | -2.68698600 |
| Cd | -1.23620100 | 1.23620100  | -4.23332800 |
| Cd | 1.23620100  | -1.23620100 | -4.23332800 |
| Cd | 1.23620100  | -4.23332800 | -1.23620100 |
| Cd | 4.23332800  | -1.23620100 | -1.23620100 |

(CdSe)<sub>19</sub>

|    |             |             |             |
|----|-------------|-------------|-------------|
| Cd | -0.06017800 | -0.00582500 | 3.08252500  |
| Se | 2.35373800  | 1.29032900  | 3.36350800  |
| Se | -0.08769500 | -2.73491900 | 3.35681700  |
| Cd | -4.47047100 | 0.21096400  | 2.40685000  |
| Cd | -2.30798800 | -3.80092900 | 2.11890600  |
| Cd | 2.19589900  | -3.91101000 | 2.46646800  |
| Cd | 4.46243500  | 0.05177400  | 2.09345900  |
| Cd | -2.08683900 | 3.88843000  | 2.04827800  |
| Cd | 2.30654100  | 3.92254800  | 2.67847600  |
| Se | 0.03903700  | 5.55772700  | 2.56380100  |
| Se | -4.72312300 | -2.54146100 | 2.39166600  |
| Se | 4.65680200  | -2.69428700 | 2.19559500  |
| Se | -2.33779100 | 1.51159900  | 3.43915300  |
| Se | -3.95300000 | 4.72998900  | 0.23873200  |
| Se | -6.58466800 | 0.73148600  | 0.67405600  |
| Cd | -5.26083100 | 2.52034800  | -0.88330700 |
| Se | -2.19047800 | -5.79690500 | 0.25289700  |
| Se | 2.75883100  | -6.02164100 | 0.70441200  |
| Se | 6.19715700  | 1.02122300  | 0.19169500  |
| Cd | 0.44884900  | -5.72838200 | -0.69157700 |
| Cd | 4.86014800  | 3.23242300  | -0.78477800 |
| Cd | 4.19786500  | -3.85802700 | -0.32421900 |
| Cd | 1.10744600  | 5.57296700  | 0.00633900  |
| Cd | -5.29578900 | -1.63305000 | -0.18334100 |
| Se | 3.80774800  | 5.24673700  | 0.69744200  |

|    |             |             |             |
|----|-------------|-------------|-------------|
| Se | 3.99031300  | -2.54985200 | -2.72501200 |
| Cd | 4.86311900  | -0.07444300 | -1.97944500 |
| Se | -4.24956500 | -2.29789100 | -2.58538000 |
| Cd | -2.51237700 | -4.31171200 | -2.05892400 |
| Se | 0.22952700  | 4.73399300  | -2.44587000 |
| Cd | -2.37085000 | 4.10647800  | -1.95403600 |
| Cd | 1.21640000  | -2.38163000 | -2.85489000 |
| Se | -0.07029600 | -4.77990900 | -3.26437400 |
| Se | 4.08240700  | 2.28851300  | -3.28869200 |
| Cd | 1.42746900  | 2.24598300  | -2.64443900 |
| Se | -3.96828300 | 2.32958600  | -3.33731400 |
| Cd | -2.65406100 | -0.04199400 | -2.96263200 |
| Se | -0.02744300 | -0.06255900 | -1.99618500 |

### Cartesian coordinates of CdSe-cys clusters in alkaline solution

| (CdSe) <sub>1</sub> |             |             |             |
|---------------------|-------------|-------------|-------------|
| C                   | 2.54418000  | 1.14398000  | 0.37137600  |
| C                   | 2.46761500  | -0.31959100 | 0.80832900  |
| C                   | 2.89086500  | -1.30946300 | -0.30703600 |
| O                   | 3.96905200  | -1.05386600 | -0.89871500 |
| O                   | 2.14764000  | -2.31158300 | -0.48876100 |
| N                   | 1.14245300  | -0.67458300 | 1.32248800  |
| S                   | 1.34896000  | 1.62899000  | -0.93257500 |
| H                   | 2.39552800  | 1.78291200  | 1.24991700  |
| H                   | 3.55488100  | 1.32401600  | -0.00296700 |
| H                   | 3.22323400  | -0.44544300 | 1.60091900  |
| H                   | 1.08991400  | -0.54913900 | 2.32804200  |
| H                   | 1.00473700  | -1.66292200 | 1.11035200  |
| Cd                  | -0.68907300 | 0.46963700  | 0.19114800  |
| Se                  | -3.23478700 | 0.25430200  | 0.50529800  |

| (CdSe) <sub>2</sub> |             |             |             |
|---------------------|-------------|-------------|-------------|
| Cd                  | -2.71601800 | 0.41987800  | -0.05712400 |
| Se                  | -1.82304300 | -2.07585900 | -0.33331000 |
| Se                  | -0.83483200 | 2.28218900  | 0.24252200  |
| Cd                  | 0.34710700  | -0.33777200 | 0.19067800  |
| C                   | 3.43827700  | -1.50937500 | 0.32338100  |
| C                   | 3.44922200  | -0.58364200 | -0.89487600 |
| C                   | 4.09504900  | 0.79693600  | -0.60897100 |
| O                   | 5.20143700  | 0.78169000  | -0.01393900 |
| O                   | 3.48596900  | 1.81043900  | -1.04615300 |
| N                   | 2.11193000  | -0.40849200 | -1.47136400 |
| S                   | 2.38598200  | -0.95788700 | 1.72367800  |
| H                   | 3.11345000  | -2.50637300 | 0.00162000  |
| H                   | 4.46796300  | -1.59618300 | 0.67906900  |
| H                   | 4.11605400  | -1.05616100 | -1.63492100 |
| H                   | 1.92765200  | -1.09456600 | -2.19575400 |
| H                   | 2.09659500  | 0.52207900  | -1.88957900 |

| (CdSe) <sub>3</sub> |             |             |             |
|---------------------|-------------|-------------|-------------|
| C                   | -3.98038700 | 1.23747000  | 1.45353200  |
| C                   | -4.57286200 | 0.71956300  | 0.14141900  |
| C                   | -5.23034900 | -0.67738200 | 0.27173300  |
| O                   | -6.01445200 | -0.83697500 | 1.24060700  |
| O                   | -4.97045100 | -1.51471800 | -0.63455400 |
| N                   | -3.58888200 | 0.71561500  | -0.94434500 |
| S                   | -2.56907500 | 0.27117000  | 2.11600700  |
| H                   | -3.66184100 | 2.27674700  | 1.30527200  |
| H                   | -4.78037700 | 1.23880600  | 2.19852300  |
| H                   | -5.40534300 | 1.39928600  | -0.10785100 |
| H                   | -3.56709000 | 1.60894900  | -1.42537300 |
| H                   | -3.87818600 | -0.00711300 | -1.60191700 |
| Cd                  | -1.31140100 | 0.14197200  | -0.21171800 |
| Cd                  | 2.16171100  | 1.49361600  | 0.04812600  |
| Cd                  | 1.94275900  | -1.68960900 | 0.06869600  |
| Se                  | 4.03861900  | -0.22802800 | 0.80602600  |
| Se                  | -0.02445300 | 2.50325700  | -0.99080500 |
| Se                  | -0.36611400 | -2.33805300 | -0.96545200 |

| (CdSe) <sub>4</sub> |             |             |             |
|---------------------|-------------|-------------|-------------|
| Cd                  | -3.05807000 | -0.65359700 | -0.33298900 |

|    |             |             |             |
|----|-------------|-------------|-------------|
| Cd | 3.12434700  | -0.91358900 | -2.01297100 |
| Cd | 0.57356200  | 1.47454200  | -1.18766600 |
| Cd | 0.62603600  | -3.17537700 | -0.67675700 |
| Se | -1.75519400 | 1.74383900  | -0.02797800 |
| Se | 2.93499200  | 1.67952000  | -2.35530100 |
| Se | -1.85045800 | -3.08762000 | 0.14482500  |
| Se | 3.10235400  | -3.50213400 | -1.51484800 |
| C  | -6.15783200 | -1.65267500 | -0.66821100 |
| C  | -6.19930700 | -1.04793100 | 0.73792200  |
| C  | -6.94180200 | 0.31130900  | 0.78538600  |
| O  | -8.07921500 | 0.34115900  | 0.25206300  |
| O  | -6.36812900 | 1.25493500  | 1.39399400  |
| N  | -4.86314200 | -0.92116800 | 1.32603200  |
| S  | -5.17628200 | -0.70316700 | -1.89643000 |
| H  | -5.75129600 | -2.66915000 | -0.59788000 |
| H  | -7.18767200 | -1.72856000 | -1.02650500 |
| H  | -6.81430100 | -1.72925600 | 1.34824300  |
| H  | -4.63804900 | -1.71656000 | 1.91409200  |
| H  | -4.87759800 | -0.07934500 | 1.90215700  |

(CdSe)<sub>5</sub>

|    |             |             |             |
|----|-------------|-------------|-------------|
| Cd | 3.62943300  | -0.18920000 | -0.04309600 |
| Cd | 0.99883400  | -1.91571100 | -0.07950700 |
| Cd | 0.36322700  | 1.31807200  | 1.77951500  |
| Se | 0.21076900  | -1.28916900 | 2.47267500  |
| Se | 3.59038400  | -2.77534700 | -0.56787000 |
| Se | 2.79155700  | 2.28735200  | 0.33326000  |
| Se | -0.25747600 | -0.65236400 | -2.23025800 |
| Se | -1.50222700 | 2.78376300  | 0.28011400  |
| Cd | -2.52166600 | 0.43119700  | -0.77988600 |
| Cd | 0.62167600  | 1.79876500  | -1.37215500 |
| C  | -4.46876500 | -2.12351900 | -0.88727400 |
| C  | -4.35967400 | -1.91670000 | 0.62766000  |
| C  | -5.68912000 | -1.39757100 | 1.23618800  |
| O  | -6.72343900 | -2.05394000 | 0.95602900  |
| O  | -5.61804000 | -0.38600200 | 1.98593000  |
| N  | -3.24987000 | -1.03415900 | 0.99368400  |
| S  | -4.68659800 | -0.58007800 | -1.85905300 |
| H  | -3.56838800 | -2.64191500 | -1.23935400 |
| H  | -5.32526200 | -2.77614000 | -1.07449200 |
| H  | -4.20491900 | -2.91413700 | 1.06769700  |
| H  | -2.44211000 | -1.52560100 | 1.37541900  |
| H  | -3.61109700 | -0.41669000 | 1.72332500  |

(CdSe)<sub>6</sub>

|    |             |             |             |
|----|-------------|-------------|-------------|
| Cd | 2.10990500  | 1.50390100  | -1.46640200 |
| Cd | -2.16893500 | 0.71629600  | -0.48003600 |
| Cd | 1.08833100  | -2.16655300 | -1.17002600 |
| Se | -0.37800300 | 2.72059000  | -1.44663600 |
| Se | 3.20600000  | -0.87197100 | -2.33894800 |
| Se | -1.63767600 | -1.99639300 | -1.14787400 |
| Se | 3.28610900  | 2.01473000  | 1.25794200  |
| Se | -1.58392000 | 0.91582300  | 2.42576000  |
| Se | 1.90018200  | -2.77480500 | 1.68976600  |
| Cd | 0.52143500  | 2.19667300  | 1.21189800  |
| Cd | 3.27310200  | -0.64988000 | 0.62394900  |
| Cd | -0.50412700 | -1.43032500 | 1.49528700  |
| C  | -5.37399300 | -0.32655400 | -1.62093100 |

|   |             |             |             |
|---|-------------|-------------|-------------|
| C | -6.00096600 | -1.12888300 | -0.46570200 |
| C | -7.21709500 | -0.38887200 | 0.13482400  |
| O | -8.20488300 | -0.24086600 | -0.63657800 |
| O | -7.13923700 | 0.00870600  | 1.32750000  |
| N | -5.06514800 | -1.53771400 | 0.57235800  |
| S | -4.64062000 | 1.30294300  | -1.19349500 |
| H | -4.59553500 | -0.94762800 | -2.08047200 |
| H | -6.14926600 | -0.15560200 | -2.37492900 |
| H | -6.40981100 | -2.03456300 | -0.94087800 |
| H | -4.99025100 | -0.77172800 | 1.23649600  |
| H | -4.14161600 | -1.68692100 | 0.16827600  |

(CdSe)<sub>7</sub>

|    |             |             |             |
|----|-------------|-------------|-------------|
| Se | -1.90023000 | 3.51274400  | 0.48770700  |
| Se | -1.87880500 | -0.35321600 | -2.49205000 |
| Cd | -0.80984300 | 2.03461200  | -1.48545600 |
| Cd | -3.31305300 | -1.01440100 | -0.18930200 |
| Se | 5.80786400  | 0.38763100  | 0.11530500  |
| Se | 1.86791300  | 1.56856300  | -2.21783300 |
| Cd | 0.78273300  | -1.45646600 | 1.57738200  |
| Cd | 3.18545900  | 1.25289300  | 0.16587600  |
| Cd | -0.81295000 | 1.53248900  | 1.95661700  |
| Cd | 4.26036300  | -1.72072400 | -0.15196900 |
| Cd | 0.76907400  | -0.96407000 | -1.96612800 |
| Se | 1.89006500  | -2.98603900 | -0.45008800 |
| Se | 1.85961000  | 0.92465700  | 2.56386900  |
| Se | -1.87730300 | -1.04480900 | 2.22474000  |
| C  | -6.19091100 | -1.73045700 | 1.08675400  |
| C  | -6.41859200 | -0.26795800 | 0.69132400  |
| C  | -7.38393900 | -0.12584600 | -0.51343400 |
| O  | -8.47489000 | -0.74260300 | -0.42766900 |
| O  | -7.01261400 | 0.62711100  | -1.45453900 |
| N  | -5.16471100 | 0.44860500  | 0.42515000  |
| H  | -5.64278100 | -1.75759300 | 2.03655300  |
| H  | -7.17017500 | -2.18581200 | 1.25388200  |
| H  | -6.94153400 | 0.20303300  | 1.53834400  |
| H  | -5.35511500 | 1.05679600  | -0.37324400 |
| H  | -4.89653900 | 1.03218900  | 1.21074700  |
| S  | -5.28134700 | -2.73128500 | -0.15551000 |

(CdSe)<sub>8</sub>

|    |             |             |             |
|----|-------------|-------------|-------------|
| Se | -4.92513600 | 0.13800200  | 0.69809100  |
| Cd | -3.21894700 | -1.95790600 | 1.25417300  |
| Se | -0.74942400 | -2.22804900 | 2.43983100  |
| Cd | 0.25958300  | 0.28594200  | 2.57673500  |
| Se | -1.02571800 | 2.69885100  | 2.11573500  |
| Cd | -2.76896000 | 1.81653000  | 0.22898400  |
| Se | -2.37976900 | 1.53004000  | -2.54763100 |
| Cd | -3.51560700 | -0.81211200 | -1.73121500 |
| Se | -2.65588400 | -3.38037100 | -1.18239900 |
| Cd | -0.19288800 | -2.39285200 | -0.32095100 |
| Se | 1.58203600  | -1.06246500 | -1.89223100 |
| Cd | 0.36660100  | 1.44102700  | -2.22469100 |
| Se | 2.88442100  | 1.06090800  | 2.25018900  |
| Cd | 1.40677700  | 2.90847000  | 0.73502000  |
| Se | 1.82010200  | 3.69803200  | -1.78873500 |
| Cd | 3.57014900  | -0.41929600 | -0.04085600 |
| C  | 6.72231000  | -1.11170600 | 0.47478700  |

|   |            |             |             |
|---|------------|-------------|-------------|
| C | 6.13491400 | -2.52291800 | 0.38786000  |
| C | 6.50355100 | -3.24800900 | -0.93166100 |
| O | 7.71945500 | -3.24620500 | -1.24676400 |
| O | 5.56295300 | -3.81695200 | -1.55006300 |
| N | 4.68155000 | -2.53703700 | 0.58649600  |
| S | 6.05123200 | 0.08876900  | -0.74175900 |
| H | 6.55448900 | -0.72531400 | 1.48765300  |
| H | 7.80197200 | -1.19270300 | 0.32458100  |
| H | 6.62368600 | -3.10948200 | 1.18226600  |
| H | 4.31797400 | -3.25394600 | -0.04348900 |
| H | 4.44408700 | -2.79724500 | 1.53788100  |

(CdSe)<sub>9</sub>

|    |             |             |             |
|----|-------------|-------------|-------------|
| Se | 2.61999700  | -1.23133200 | 1.93257700  |
| Cd | 3.40984700  | -0.09582400 | -0.43293400 |
| Se | 2.07081600  | 2.27138300  | -1.25550000 |
| Se | 0.56518800  | -3.75102000 | -1.67767400 |
| Cd | -1.71080600 | -2.37251500 | -2.09714400 |
| Cd | -0.56930200 | 1.85927700  | -2.00573600 |
| Se | -2.09548500 | 0.08468800  | -3.42142200 |
| Cd | -4.17598000 | -0.06795600 | -1.63604000 |
| Se | -4.75256500 | 0.79050000  | 0.93626500  |
| Cd | -2.57791900 | 2.38697500  | 1.41584600  |
| Cd | -3.44596300 | -1.66472300 | 1.17319900  |
| Se | -0.46846900 | 2.54245400  | 3.22852500  |
| Cd | 0.30131600  | -0.03405400 | 2.81088100  |
| Se | -1.77703800 | 4.01779000  | -0.71298200 |
| Se | -4.28468000 | -2.89524200 | -1.17364500 |
| Cd | 0.67170800  | -2.97550900 | 0.88894800  |
| Cd | 0.56527700  | 3.36929500  | 0.76903200  |
| Se | -1.33431900 | -2.32266900 | 2.73332900  |
| C  | 5.73145000  | -0.00840600 | -2.75054700 |
| C  | 6.52745200  | 0.36008600  | -1.49682000 |
| C  | 7.41851100  | -0.79825600 | -0.97999800 |
| O  | 8.13987200  | -1.36994100 | -1.83500500 |
| O  | 7.38373300  | -1.03334100 | 0.25848700  |
| N  | 5.66664600  | 0.85916200  | -0.41975200 |
| S  | 4.45468100  | -1.30635900 | -2.51429000 |
| H  | 5.25065900  | 0.89817700  | -3.13803600 |
| H  | 6.44233000  | -0.35563300 | -3.50465500 |
| H  | 7.23600800  | 1.14704600  | -1.80272700 |
| H  | 5.60158100  | 1.87148400  | -0.43810700 |
| H  | 6.10616800  | 0.57388400  | 0.45570900  |

(CdSe)<sub>10</sub>

|    |             |             |             |
|----|-------------|-------------|-------------|
| Cd | -0.27965900 | 3.28835200  | 0.94851900  |
| Se | 2.02441900  | 3.93613300  | -0.53361100 |
| Cd | 2.11138100  | 2.11932900  | -2.60423100 |
| Se | 0.07501700  | 0.19316500  | -2.67862200 |
| Cd | -2.28731000 | 1.26664300  | -1.87552800 |
| Se | -2.71554600 | 3.51218100  | -0.20515000 |
| Se | 4.92548900  | 0.13407400  | 1.19848700  |
| Cd | 3.09768400  | -1.84521600 | 1.23278600  |
| Se | 2.45584300  | -3.66180200 | -0.78628100 |
| Cd | 0.27155400  | -2.43750300 | -1.96151400 |
| Se | -4.59338000 | -0.18227700 | -1.30838300 |
| Cd | -3.17190400 | -1.95376500 | 0.27892500  |
| Se | -1.75181500 | -4.00702600 | -0.81542800 |



|    |             |             |             |
|----|-------------|-------------|-------------|
| Cd | 2.97488900  | 2.01094900  | 1.21480500  |
| Cd | 0.29166600  | -4.00995400 | 1.03911300  |
| Cd | -3.93236600 | 1.33749400  | 1.00292800  |
| Cd | -0.23226100 | -0.41009200 | 2.86345800  |
| Se | 0.92735900  | 2.05295900  | 3.10361100  |
| Se | -2.99449400 | -0.60494900 | 2.72292700  |
| Se | 1.27749700  | -2.68780800 | 3.20960800  |
| C  | 4.05404200  | 1.77924600  | -5.30223200 |
| C  | 3.11479800  | 2.94459700  | -5.61825900 |
| C  | 3.73278300  | 4.34364300  | -5.36717700 |
| O  | 4.90163200  | 4.52419800  | -5.79073700 |
| O  | 2.98674600  | 5.20017900  | -4.82024200 |
| N  | 1.83640100  | 2.82922200  | -4.91405000 |
| S  | 4.48418900  | 1.54178400  | -3.53217100 |
| H  | 3.60229100  | 0.85553000  | -5.68357700 |
| H  | 4.97913200  | 1.94768700  | -5.85931600 |
| H  | 2.94710700  | 2.90913700  | -6.70841200 |
| H  | 1.20051500  | 2.20157100  | -5.39599000 |
| H  | 1.42541100  | 3.76082800  | -4.88559200 |

(CdSe)<sub>13</sub>

|    |             |             |             |
|----|-------------|-------------|-------------|
| Se | -3.35948100 | -3.61450700 | 1.12372200  |
| Se | -0.58626400 | -3.66005200 | -3.02287200 |
| Se | -4.48229800 | -0.53594300 | -2.50250200 |
| Cd | -1.00628800 | -3.86749200 | -0.23410300 |
| Cd | -4.17712200 | -1.11217400 | 0.14455900  |
| Cd | -1.89934500 | -1.28457900 | -3.30712300 |
| Cd | -2.43602600 | -1.80959100 | 3.02574200  |
| Cd | -3.07063700 | 1.87824300  | -2.61207200 |
| Cd | 1.76758500  | -2.65211900 | -1.91502300 |
| Se | -4.13877700 | 0.35798900  | 2.49379000  |
| Se | -0.89368300 | 1.17472900  | -4.19787400 |
| Se | 1.65034300  | -3.86204900 | 0.59030800  |
| Se | -0.05450300 | -1.59064600 | 4.37727800  |
| Se | 3.30116700  | -0.55380200 | -2.67304400 |
| Se | -3.14948600 | 3.84270000  | -0.68209300 |
| Cd | 1.34608000  | -1.42065100 | 1.88674800  |
| Cd | 1.07497800  | 1.10961600  | -2.22898700 |
| Cd | -2.20092300 | 2.06410400  | 1.36142500  |
| Se | -0.37712800 | 0.17033400  | 0.12222100  |
| Se | 3.38337400  | 0.50159200  | 2.07054500  |
| Se | -0.31719300 | 3.43830600  | 3.00814300  |
| Se | 2.01859700  | 3.68153600  | -1.27153100 |
| Cd | -0.06452600 | 1.07044400  | 4.18111600  |
| Cd | 4.67601800  | -0.29646200 | -0.26571100 |
| Cd | -0.57527400 | 4.30164100  | -1.21015200 |
| Cd | 1.43840400  | 2.24192400  | 1.08791600  |
| C  | 7.84096200  | -0.89943100 | -0.97640400 |
| C  | 7.84531000  | 0.61550500  | -0.76067800 |
| C  | 8.47819200  | 1.03101300  | 0.59157600  |
| O  | 9.58793600  | 0.51229500  | 0.86948300  |
| O  | 7.85582800  | 1.89168100  | 1.27120500  |
| N  | 6.50963600  | 1.20537700  | -0.89944300 |
| H  | 7.53444700  | -1.10686600 | -2.00879500 |
| H  | 8.86903600  | -1.25152900 | -0.85793900 |
| H  | 8.51802800  | 1.03347800  | -1.52735100 |
| H  | 6.47697600  | 1.99569200  | -0.25449300 |
| H  | 6.35699400  | 1.55129600  | -1.84110200 |

|                      |             |             |             |
|----------------------|-------------|-------------|-------------|
| S                    | 6.76513000  | -1.84416200 | 0.17056700  |
| (CdSe) <sub>16</sub> |             |             |             |
| Se                   | 1.48317000  | 3.88343500  | 2.59719500  |
| Se                   | 0.04585100  | 0.83136600  | 4.98353900  |
| Se                   | -3.44430100 | 3.16827400  | 2.28605600  |
| Se                   | -3.76556100 | -1.73435500 | 3.65926100  |
| Se                   | -5.53326100 | -0.70734400 | 0.09140200  |
| Se                   | -2.57031900 | -4.81846900 | -0.18721300 |
| Se                   | 0.44961600  | -3.78951700 | 3.71878400  |
| Se                   | 2.44869800  | -4.63245100 | 0.18440200  |
| Se                   | 4.03558600  | -0.53185700 | 2.53523400  |
| Se                   | 3.75525200  | 3.69710200  | -1.62745200 |
| Se                   | -0.66706300 | 5.27761300  | -1.37034900 |
| Se                   | 0.58435400  | 1.63511400  | -4.60007500 |
| Se                   | 3.99873200  | -0.87307900 | -2.38490700 |
| Se                   | 0.34127800  | -3.28551100 | -3.87783100 |
| Se                   | -3.34946500 | -1.48016500 | -3.93718100 |
| Se                   | -3.84467900 | 2.95756800  | -2.62535400 |
| Cd                   | -2.84094300 | 3.98623500  | -0.25724300 |
| Cd                   | -1.12597600 | 3.27970100  | -3.24712400 |
| Cd                   | 1.54446300  | 4.18001600  | -0.13591300 |
| Cd                   | 2.66562400  | 1.50041500  | -2.76048000 |
| Cd                   | -1.00337900 | 2.89499100  | 3.44867200  |
| Cd                   | 2.23262600  | 1.32624000  | 3.32434300  |
| Cd                   | 5.30999500  | -0.53630600 | 0.03250600  |
| Cd                   | 2.57138200  | -2.79090200 | 2.24851700  |
| Cd                   | 2.27251200  | -2.96418200 | -1.96011300 |
| Cd                   | -0.71258800 | -0.75356300 | -4.33235400 |
| Cd                   | -1.05790600 | -1.54623200 | 4.20060900  |
| Cd                   | -4.24002500 | 0.31436400  | -2.07260200 |
| Cd                   | -4.28548800 | 0.55825700  | 2.22916900  |
| Cd                   | -3.81569500 | -2.69467400 | 1.04195000  |
| Cd                   | -0.18843100 | -4.60674500 | 1.14918300  |
| Cd                   | -2.09358300 | -3.51256200 | -2.55379900 |
| C                    | 8.23285800  | -0.31628300 | -1.28014800 |
| C                    | 8.08455100  | 1.10038100  | -0.71282500 |
| C                    | 9.04504700  | 1.35387700  | 0.47839900  |
| O                    | 10.25622400 | 1.08164000  | 0.28465800  |
| O                    | 8.53977600  | 1.84512000  | 1.52426700  |
| N                    | 6.70325100  | 1.41845800  | -0.33169000 |
| H                    | 7.66240200  | -0.38148200 | -2.21490200 |
| H                    | 9.28768500  | -0.46964400 | -1.52173700 |
| H                    | 8.41662800  | 1.78672000  | -1.50711700 |
| H                    | 6.77045900  | 1.90848100  | 0.56287300  |
| H                    | 6.24641100  | 2.04393700  | -0.99228000 |
| S                    | 7.68417000  | -1.66077600 | -0.15547300 |
| (CdSe) <sub>19</sub> |             |             |             |
| Cd                   | 0.14435400  | 1.06715300  | 4.39780700  |
| Se                   | 1.86035100  | 0.94585700  | 2.19409700  |
| Se                   | 0.08702700  | -3.97273300 | 3.97297500  |
| Cd                   | -4.21647800 | 0.02895700  | 2.62653800  |
| Cd                   | -1.88498700 | -4.04350400 | 2.09944600  |
| Cd                   | 2.35807600  | -4.37318300 | 2.59536100  |
| Cd                   | 4.27373800  | -0.37483900 | 1.89724200  |
| Cd                   | -2.23012200 | 4.12848000  | 2.07982600  |
| Cd                   | 2.20891500  | 3.63242000  | 2.24050000  |

|    |             |             |             |
|----|-------------|-------------|-------------|
| Se | 0.11987100  | 5.49468400  | 2.40983800  |
| Se | -4.28190200 | -2.72798600 | 2.46147600  |
| Se | 4.78516800  | -3.00268500 | 2.37949700  |
| Se | -2.43552600 | 1.82129800  | 3.55508200  |
| Se | -4.04001900 | 4.82066600  | 0.15579800  |
| Se | -6.36956300 | 0.54117400  | 0.91114200  |
| Cd | -5.07233200 | 2.33579600  | -0.64222800 |
| Se | -1.99707000 | -5.87327600 | 0.03605200  |
| Se | 2.80820200  | -6.09424300 | 0.38521400  |
| Se | 6.09518500  | 0.93257500  | 0.29348500  |
| Cd | 0.53687000  | -5.67297300 | -1.02068400 |
| Cd | 4.82585200  | 3.24020400  | -0.58441700 |
| Cd | 4.26347300  | -3.79563900 | -0.23245600 |
| Cd | 1.16747700  | 5.49673500  | -0.18558800 |
| Cd | -5.13062700 | -1.80960500 | -0.02196200 |
| Se | 3.82096500  | 5.37766800  | 0.74320300  |
| Se | 4.01972500  | -2.48062600 | -2.62966500 |
| Cd | 4.84761600  | 0.04393600  | -2.03336900 |
| Se | -4.28240300 | -2.35558600 | -2.55776700 |
| Cd | -2.38271600 | -4.28227600 | -2.23929600 |
| Se | 0.10704300  | 4.84493600  | -2.58874900 |
| Cd | -2.45136400 | 4.10882200  | -1.99228500 |
| Cd | 1.33119100  | -2.38747600 | -3.28206400 |
| Se | -0.01114300 | -4.76172500 | -3.58328700 |
| Se | 4.08308000  | 2.44369800  | -3.15221700 |
| Cd | 1.36846800  | 2.41101400  | -2.86242500 |
| Se | -4.09703100 | 2.30169300  | -3.26917000 |
| Cd | -2.75942900 | -0.08835300 | -2.98814100 |
| Se | -0.00486800 | 0.01872600  | -3.07767600 |
| C  | -0.07675200 | 0.99751200  | 7.68201700  |
| C  | 0.29163000  | -0.43365600 | 7.28112000  |
| C  | 1.80483400  | -0.72366200 | 7.42069000  |
| O  | 2.30789600  | -0.45681800 | 8.54282300  |
| O  | 2.39102100  | -1.23924600 | 6.43348500  |
| N  | -0.19022100 | -0.75569400 | 5.93503200  |
| H  | -1.16967700 | 1.09282300  | 7.67702700  |
| H  | 0.26416200  | 1.14826300  | 8.70924000  |
| H  | -0.19575700 | -1.09164700 | 8.01967900  |
| H  | 0.29189300  | -1.58207900 | 5.57872600  |
| H  | -1.18151400 | -0.97828100 | 5.96060300  |
| S  | 0.64338600  | 2.32524100  | 6.63630900  |

### Cartesian coordinates of CdSe-cys clusters in gas

#### (CdSe)<sub>1</sub>

|    |             |             |             |
|----|-------------|-------------|-------------|
| C  | -2.80673800 | -1.09006100 | 0.51717700  |
| C  | -2.50546300 | 0.36441800  | 0.86748100  |
| C  | -2.59481300 | 1.24907800  | -0.36983700 |
| O  | -3.16741300 | 0.93738600  | -1.38639700 |
| O  | -1.99282700 | 2.42560300  | -0.17583200 |
| N  | -1.19781900 | 0.50647800  | 1.50457800  |
| S  | -1.58017500 | -1.89410100 | -0.56430600 |
| H  | -2.82774000 | -1.69259400 | 1.43011700  |
| H  | -3.78854800 | -1.16232100 | 0.04573000  |
| H  | -3.32050800 | 0.71020400  | 1.52696600  |
| H  | -1.20152800 | 0.09385600  | 2.43363800  |
| H  | -0.95065700 | 1.48775400  | 1.61224100  |
| H  | -2.05750500 | 2.94805100  | -0.99063300 |
| Se | 3.03284500  | 0.34535300  | -0.19912000 |
| Cd | 0.73638600  | -0.33674300 | 0.15232800  |
| H  | -1.92526100 | -1.24752400 | -1.69397400 |

#### (CdSe)<sub>2</sub>

|    |             |             |             |
|----|-------------|-------------|-------------|
| Cd | -0.65625300 | -1.42588600 | -0.77009400 |
| Se | 0.30117100  | 1.08061600  | -1.26002000 |
| Se | 1.41995900  | -3.07324700 | -0.59960400 |
| Cd | 2.21559200  | -0.64412200 | -1.00962700 |
| C  | -4.14583400 | -1.12946700 | -0.10997800 |
| C  | -3.27254200 | -0.57069900 | 1.01000900  |
| C  | -2.82145600 | 0.85375000  | 0.68338300  |
| O  | -3.36619600 | 1.54786700  | -0.14113200 |
| O  | -1.76266300 | 1.20309800  | 1.41032200  |
| N  | -2.08925500 | -1.40422200 | 1.23049000  |
| S  | -3.31408300 | -1.32761200 | -1.72377100 |
| H  | -4.50318000 | -2.12843500 | 0.15727500  |
| H  | -5.01600400 | -0.48667300 | -0.25383000 |
| H  | -3.21579500 | -0.01229900 | -2.00131200 |
| H  | -3.90493500 | -0.50759300 | 1.91148500  |
| H  | -2.34292800 | -2.32821000 | 1.56922100  |
| H  | -1.48399400 | -0.97409700 | 1.92556200  |
| H  | -1.25366800 | 1.88951400  | 0.93361700  |

#### (CdSe)<sub>3</sub>

|    |             |             |             |
|----|-------------|-------------|-------------|
| C  | 4.63237700  | 1.13600100  | -0.44515700 |
| C  | 4.29123400  | 0.49945900  | 0.89933800  |
| C  | 4.36027300  | -1.02141600 | 0.81776900  |
| O  | 4.91694100  | -1.62798900 | -0.06563500 |
| O  | 3.75303800  | -1.59165800 | 1.86036600  |
| N  | 2.97236000  | 0.90798100  | 1.37909000  |
| S  | 3.45909300  | 0.79688900  | -1.79882500 |
| H  | 4.64842800  | 2.22528500  | -0.34347100 |
| H  | 5.62652800  | 0.81346800  | -0.76032500 |
| H  | 3.73742500  | -0.51619400 | -1.91294600 |
| H  | 5.09027600  | 0.79597500  | 1.60117000  |
| H  | 2.94057000  | 1.90530800  | 1.57621000  |
| H  | 2.74299400  | 0.41562100  | 2.23846800  |
| H  | 3.68728700  | -2.54587300 | 1.69674600  |
| Cd | -2.33976700 | 1.38991200  | 0.19599200  |
| Cd | -1.65515000 | -1.84885200 | -0.10495400 |
| Cd | 1.11113700  | 0.46879900  | -0.19287600 |

|                     |             |             |             |
|---------------------|-------------|-------------|-------------|
| Se                  | 0.84686200  | -2.15042700 | -0.36418400 |
| Se                  | -3.89852200 | -0.64806100 | 0.20003900  |
| Se                  | -0.19145700 | 2.72922600  | 0.10476500  |
| (CdSe) <sub>4</sub> |             |             |             |
| Se                  | 0.70324400  | 2.45248700  | -0.60528200 |
| Se                  | 0.77949800  | -1.58883500 | -2.15344900 |
| Se                  | -0.55325900 | -0.85496000 | 1.92079000  |
| Cd                  | 2.37505400  | 0.47625700  | -1.42974200 |
| Cd                  | 1.39321200  | 1.03899800  | 1.61781500  |
| Cd                  | -0.92462000 | 0.20878800  | -0.64698800 |
| Cd                  | 1.43242800  | -1.98896200 | 0.44081300  |
| Se                  | 3.60613500  | -0.37738700 | 0.87164400  |
| C                   | -4.55217300 | 0.56745900  | -1.05416200 |
| C                   | -4.05257500 | -0.86090000 | -1.26119800 |
| C                   | -4.04651200 | -1.61454100 | 0.06391000  |
| O                   | -4.75435600 | -1.32860300 | 0.99938900  |
| O                   | -3.19252500 | -2.64003200 | 0.05005900  |
| N                   | -2.72633900 | -0.88162400 | -1.87343200 |
| S                   | -3.45178600 | 1.61733200  | -0.05140200 |
| H                   | -4.63774900 | 1.07281600  | -2.02088400 |
| H                   | -5.54231300 | 0.54715300  | -0.59561400 |
| H                   | -3.68734100 | 1.00090200  | 1.12268800  |
| H                   | -4.79838400 | -1.37727200 | -1.88967600 |
| H                   | -2.76000800 | -0.54319500 | -2.83142800 |
| H                   | -2.33992100 | -1.82328700 | -1.90978200 |
| H                   | -3.14487300 | -3.00929200 | 0.94625200  |
| (CdSe) <sub>5</sub> |             |             |             |
| Cd                  | 2.13607400  | 2.47890300  | 1.14080100  |
| Cd                  | 1.38491700  | 0.83934000  | -1.76011400 |
| Cd                  | 1.04776300  | -0.89469200 | 1.73128500  |
| Se                  | 2.48676000  | -1.37643200 | -0.55267000 |
| Se                  | 2.17950800  | 3.30476100  | -1.28697900 |
| Se                  | 1.19234400  | 1.28412700  | 3.19257500  |
| Se                  | -1.08883400 | -0.09668200 | -2.44889900 |
| Se                  | -1.29358400 | -2.27296300 | 1.25828900  |
| Cd                  | 0.00680100  | -2.21883000 | -1.13431300 |
| Cd                  | -2.13289000 | -0.03586100 | 0.04482000  |
| C                   | -4.23686400 | 2.68878900  | 0.79536100  |
| C                   | -2.78260200 | 2.95869200  | 1.16628200  |
| C                   | -2.00604300 | 3.54156500  | -0.01587100 |
| O                   | -2.52956800 | 3.93711500  | -1.03140200 |
| O                   | -0.70634600 | 3.55403600  | 0.24529000  |
| N                   | -2.11112500 | 1.74782100  | 1.64879600  |
| S                   | -4.50077700 | 1.36145900  | -0.43134700 |
| H                   | -4.79937900 | 2.37861700  | 1.68109900  |
| H                   | -4.69434800 | 3.60050600  | 0.40697700  |
| H                   | -2.78985000 | 3.74135500  | 1.94263900  |
| H                   | -2.55639100 | 1.41484500  | 2.50220500  |
| H                   | -1.13748100 | 1.93489000  | 1.92193500  |
| H                   | -0.13705000 | 3.79382400  | -0.53091100 |
| H                   | -3.97677700 | 2.02180800  | -1.48338800 |
| (Cdse) <sub>6</sub> |             |             |             |
| Cd                  | 0.95488900  | 1.93580400  | -1.51915000 |
| Cd                  | -1.97853400 | -0.48627200 | 0.10907300  |
| Cd                  | 1.61000200  | -1.94494300 | -1.26938500 |

|    |             |             |             |
|----|-------------|-------------|-------------|
| Se | -1.53358500 | 2.09311700  | -0.61540700 |
| Se | 2.66931700  | 0.15913500  | -2.52047600 |
| Se | -0.69111600 | -2.82905700 | -0.29756900 |
| Se | 2.37236400  | 2.84369400  | 0.73767100  |
| Se | -0.99397500 | -0.13317800 | 2.98906500  |
| Se | 3.21679800  | -2.05502000 | 1.04388300  |
| Cd | 0.05524000  | 1.89644000  | 1.67698700  |
| Cd | 3.39822800  | 0.45323900  | 0.19458100  |
| Cd | 0.69329400  | -1.85429200 | 1.91384600  |
| C  | -5.46388700 | -1.12797000 | -0.76260800 |
| C  | -5.31075900 | -0.38994400 | 0.56592600  |
| C  | -5.35280300 | 1.11703600  | 0.34496000  |
| O  | -5.91263600 | 1.64261500  | -0.58697400 |
| O  | -4.73193200 | 1.78289900  | 1.32163600  |
| N  | -4.08749700 | -0.78126000 | 1.26312500  |
| S  | -4.09140300 | -0.88154300 | -1.93454300 |
| H  | -5.50461400 | -2.20646200 | -0.58293200 |
| H  | -6.39859800 | -0.82983300 | -1.24069600 |
| H  | -4.36024100 | 0.40936200  | -2.20766200 |
| H  | -6.20788400 | -0.61922100 | 1.16654400  |
| H  | -4.14260000 | -1.74838700 | 1.57236600  |
| H  | -3.92564700 | -0.21433900 | 2.09406900  |
| H  | -4.72803200 | 2.72557900  | 1.09285000  |

(CdSe)<sub>7</sub>

|    |             |             |             |
|----|-------------|-------------|-------------|
| C  | 5.14854600  | 0.35482100  | 2.07080300  |
| C  | 5.05057600  | -0.30950100 | 0.69779300  |
| C  | 6.11295300  | 0.23577700  | -0.24568500 |
| O  | 7.10718100  | 0.82268600  | 0.11145100  |
| O  | 5.83967600  | -0.04823800 | -1.52431300 |
| N  | 3.71456500  | -0.18912200 | 0.11940500  |
| S  | 4.75809000  | 2.13253000  | 2.09115500  |
| H  | 4.41830800  | -0.09782500 | 2.74832600  |
| H  | 6.14696600  | 0.20753000  | 2.48669900  |
| H  | 5.32527800  | -1.36929100 | 0.83760600  |
| H  | 3.09864300  | -0.92340500 | 0.46781700  |
| H  | 3.74486500  | -0.30553500 | -0.89124400 |
| H  | 6.55308400  | 0.31115600  | -2.07371200 |
| Se | 0.78691800  | -2.63696300 | -0.39795500 |
| Se | -2.92968300 | -1.68631800 | 1.51382100  |
| Cd | -0.27663400 | -1.20336700 | 1.69257300  |
| Cd | -1.91438300 | -2.80992800 | -0.72694800 |
| Se | 1.33980600  | 4.41018900  | 0.78251000  |
| Se | 1.07168900  | 0.76259600  | 2.76786800  |
| Cd | -0.47314700 | 2.80705200  | 1.98665200  |
| Cd | 2.42255100  | 1.87581800  | 0.50674500  |
| Cd | 0.15608800  | -0.57309800 | -2.10276500 |
| Cd | -0.15676700 | 3.32061100  | -1.18421500 |
| Cd | -2.97472800 | 0.33418300  | -0.32428500 |
| Se | -2.49428200 | 2.88586300  | 0.15287800  |
| Se | 1.60540400  | 1.60452800  | -2.22976400 |
| Se | -2.45972100 | -0.99505600 | -2.65397100 |
| H  | 5.79577600  | 2.52512800  | 1.32693800  |

(CdSe)<sub>8</sub>

|    |             |             |            |
|----|-------------|-------------|------------|
| Se | -4.19806200 | -0.00831100 | 0.89477600 |
| Cd | -2.43172200 | -1.58926600 | 2.09211600 |
| Se | 0.05497800  | -1.39901800 | 3.06502100 |

|    |             |             |             |
|----|-------------|-------------|-------------|
| Cd | 0.79219200  | 1.08361800  | 2.50816500  |
| Se | -0.68287400 | 3.14791800  | 1.44263200  |
| Cd | -2.31408400 | 1.69111900  | -0.02008400 |
| Se | -1.93349800 | 0.64900900  | -2.53245000 |
| Cd | -2.93448900 | -1.40946300 | -1.15199800 |
| Se | -1.98940500 | -3.52922900 | 0.14487300  |
| Cd | 0.42026300  | -2.38750500 | 0.51517500  |
| Se | 2.16240500  | -1.66058100 | -1.30459700 |
| Cd | 0.70176300  | 0.38841000  | -2.34986100 |
| Se | 3.24355100  | 1.94736700  | 1.89623800  |
| Cd | 1.62087700  | 3.19202500  | 0.05529100  |
| Se | 2.52041100  | 2.34013700  | -2.27414800 |
| Cd | 3.65224100  | 0.49737500  | -0.39849700 |
| C  | 7.20851000  | -0.24268200 | -0.46016900 |
| C  | 6.45441200  | -1.40024100 | 0.18659600  |
| C  | 6.06565200  | -2.45174300 | -0.84514200 |
| O  | 6.44360600  | -2.46175200 | -1.99259400 |
| O  | 5.27038000  | -3.38171600 | -0.30969500 |
| N  | 5.25725100  | -0.93940000 | 0.88478300  |
| S  | 6.22321100  | 0.79944300  | -1.58328000 |
| H  | 7.56921300  | 0.43767700  | 0.31708100  |
| H  | 8.07668700  | -0.62225500 | -1.00247800 |
| H  | 7.16099500  | -1.90156100 | 0.87061600  |
| H  | 5.49076400  | -0.36055400 | 1.68860700  |
| H  | 4.71212800  | -1.72852800 | 1.22178600  |
| H  | 6.09525300  | -0.11630600 | -2.56246000 |
| H  | 4.96288100  | -3.96639200 | -1.02002000 |

(CdSe)<sub>9</sub>

|    |             |             |             |
|----|-------------|-------------|-------------|
| Se | -1.35127300 | 3.57783400  | 0.37797900  |
| Cd | -0.99613400 | 1.96034300  | -1.76431300 |
| Se | -2.47937200 | -0.11780900 | -2.30109200 |
| Se | 1.54976400  | 2.67466200  | -2.46214300 |
| Cd | 2.75002900  | 0.33783500  | -2.15686300 |
| Cd | -0.67417600 | -2.10421000 | -1.93831100 |
| Se | 1.85569400  | -2.18399600 | -2.73127100 |
| Cd | 3.02172000  | -2.45999200 | -0.33663800 |
| Se | 2.29649800  | -2.43663900 | 2.24094100  |
| Cd | -0.33437600 | -2.29780000 | 1.92492500  |
| Cd | 3.10541500  | 0.13604000  | 1.77823900  |
| Se | -2.01535300 | -0.36735400 | 2.81206300  |
| Cd | -0.61818500 | 1.76305200  | 2.25288800  |
| Se | -1.86526100 | -3.41106700 | 0.05155400  |
| Se | 4.66740100  | -0.26054900 | -0.37190600 |
| Cd | 1.38231400  | 3.38654000  | 0.11387500  |
| Cd | -3.13506500 | -0.90973800 | 0.29948600  |
| Se | 2.01768000  | 2.42616500  | 2.53207900  |
| C  | -6.59936800 | -0.20901400 | 0.93765400  |
| C  | -5.95270100 | 1.01936300  | 0.30427100  |
| C  | -6.10458600 | 1.00231700  | -1.21123300 |
| O  | -6.78871300 | 0.21491300  | -1.82238600 |
| O  | -5.41387500 | 1.99178100  | -1.78017000 |
| N  | -4.54176000 | 1.13201900  | 0.66569100  |
| S  | -5.80066800 | -1.80326000 | 0.55921700  |
| H  | -6.56006700 | -0.12227100 | 2.02762100  |
| H  | -7.64884800 | -0.26981500 | 0.64311600  |
| H  | -6.53101200 | 1.89511700  | 0.64670000  |
| H  | -4.43845600 | 1.31126200  | 1.66212700  |

|   |             |             |             |
|---|-------------|-------------|-------------|
| H | -4.09735600 | 1.90941500  | 0.17855000  |
| H | -5.46837300 | 1.88408600  | -2.74251700 |
| H | -6.14267700 | -1.83101800 | -0.74340000 |

(CdSe)<sub>10</sub>

|    |             |             |             |
|----|-------------|-------------|-------------|
| Cd | -0.08186000 | 4.16476400  | -1.06358400 |
| Se | 0.95767700  | 4.79227900  | -3.43375700 |
| Cd | 0.46023800  | 2.48260700  | -4.85818000 |
| Se | -2.00547800 | 1.33535900  | -4.23160300 |
| Cd | -3.27626600 | 2.15797400  | -2.05004700 |
| Se | -2.60468700 | 4.18906300  | -0.33184700 |
| Se | 3.17372600  | 1.49644800  | -4.45393100 |
| Cd | 2.45237900  | -0.73554100 | -3.31266500 |
| Se | 0.77121100  | -2.42731300 | -4.58360000 |
| Cd | -1.51681900 | -1.22309300 | -3.80394900 |
| Se | -4.64729400 | 0.66079600  | -0.28253000 |
| Cd | -2.72465000 | -1.18178700 | -0.04753300 |
| Se | -2.25303100 | -3.01889800 | -1.87363500 |
| Cd | 2.78964800  | 3.08856600  | -2.37848000 |
| Cd | 0.41365000  | -3.02943100 | -1.90569500 |
| Cd | -2.69753200 | 1.97360900  | 1.15853600  |
| Cd | 1.12133500  | 0.39202600  | 0.43154100  |
| Se | 2.01073500  | 2.89125300  | 0.16924000  |
| Se | -1.11057200 | -0.06881300 | 1.84221200  |
| Se | 2.39170900  | -1.66134600 | -0.76030100 |
| C  | 0.77002700  | 2.81262300  | -8.44772300 |
| C  | 0.21706700  | 1.42917500  | -8.11999800 |
| C  | -1.30482100 | 1.42743500  | -8.16762900 |
| O  | -1.97649800 | 2.33865700  | -8.58468900 |
| O  | -1.80532300 | 0.26841100  | -7.72357900 |
| N  | 0.67877600  | 0.94833800  | -6.82030200 |
| S  | 0.29954100  | 4.08152900  | -7.21211300 |
| H  | 1.85996500  | 2.76562200  | -8.50551800 |
| H  | 0.38281300  | 3.13154900  | -9.41692700 |
| H  | 0.53830500  | 0.75804500  | -8.93477500 |
| H  | 1.68750300  | 0.80500900  | -6.82601700 |
| H  | 0.26160900  | 0.04552300  | -6.59749100 |
| H  | -2.77165200 | 0.34783300  | -7.71459000 |
| H  | 1.54070800  | 4.51003600  | -6.92157700 |

(CdSe)<sub>13</sub>

|    |             |             |             |
|----|-------------|-------------|-------------|
| Se | -4.80422100 | -1.26293500 | -1.32347400 |
| Se | -3.32347800 | 3.29476700  | -0.53063600 |
| Se | -3.46389400 | 0.18654100  | 3.02176100  |
| Cd | -3.65498000 | 1.01826400  | -2.00082500 |
| Cd | -3.54270400 | -1.60101700 | 1.06536500  |
| Cd | -2.10659300 | 1.86937800  | 1.32437600  |
| Cd | -2.66429100 | -2.78123200 | -1.87548800 |
| Cd | -0.93919700 | -0.18047800 | 3.62006300  |
| Cd | -1.27501300 | 3.33117700  | -2.27678600 |
| Se | -2.09195600 | -3.83076000 | 0.55998200  |
| Se | 0.23475500  | 2.32072600  | 2.85228500  |
| Se | -2.12458400 | 1.63764700  | -4.17261200 |
| Se | -1.08226400 | -2.85882300 | -4.02537800 |
| Se | 1.19423900  | 4.16073400  | -1.71169400 |
| Se | 1.07074500  | -1.89066100 | 3.54785500  |
| Cd | -0.35735600 | -0.21204600 | -3.42876000 |
| Cd | 1.21181000  | 2.33515700  | 0.26249500  |



|    |             |             |             |
|----|-------------|-------------|-------------|
| Cd | 0.23353200  | -2.57319700 | 1.01109100  |
| Se | -0.36268700 | -0.03670900 | -0.46563800 |
| Se | 2.37253000  | -0.14261600 | -3.73129200 |
| Se | 2.45038300  | -3.36895600 | -0.46203200 |
| Se | 3.70799700  | 1.12098700  | 0.54412900  |
| Cd | 0.85602800  | -3.46397600 | -2.46146600 |
| Cd | 2.61662700  | 2.40233600  | -3.14570100 |
| Cd | 2.20085100  | 0.28492200  | 2.55590900  |
| Cd | 2.60806600  | -0.72744000 | -1.08505600 |
| C  | 4.57643400  | 5.08251400  | -3.53423900 |
| C  | 5.52245500  | 4.08679700  | -2.84689500 |
| C  | 6.65261000  | 3.65021200  | -3.76808800 |
| O  | 7.25088100  | 4.69032600  | -4.35803900 |
| O  | 6.97789100  | 2.49950600  | -3.93869900 |
| N  | 4.84808400  | 2.89942900  | -2.33151700 |
| H  | 3.83782100  | 5.44335200  | -2.81078800 |
| H  | 5.14039500  | 5.93845000  | -3.90930000 |
| H  | 6.00632000  | 4.64846600  | -2.03362400 |
| H  | 5.42504500  | 2.08180300  | -2.53584600 |
| H  | 4.73979600  | 2.93133200  | -1.31825300 |
| S  | 3.56559100  | 4.39187500  | -4.88606600 |
| H  | 4.56350100  | 3.86283900  | -5.62123600 |
| H  | 7.98029000  | 4.34737200  | -4.89745400 |

(CdSe)<sub>16</sub>

|    |             |             |             |
|----|-------------|-------------|-------------|
| Se | -4.98313300 | 2.10477300  | 0.57387200  |
| Se | -4.90282300 | -0.71846500 | -2.25342100 |
| Se | -2.22739600 | 3.21441000  | -3.28477700 |
| Se | -1.12514000 | -1.27372800 | -4.81721300 |
| Se | 2.04322500  | 1.08596100  | -4.25685200 |
| Se | 2.46431800  | -3.34015900 | -2.24615000 |
| Se | -2.24235400 | -4.41582900 | -1.68470900 |
| Se | -0.08049200 | -4.90962400 | 1.62237000  |
| Se | -4.21503400 | -2.39404600 | 2.27361200  |
| Se | -2.41216500 | 1.60625700  | 4.35138500  |
| Se | -1.34161900 | 4.80488200  | 1.23119100  |
| Se | 2.29328700  | 2.44177400  | 3.44299900  |
| Se | -0.06650600 | -1.61937700 | 4.70353600  |
| Se | 3.71057400  | -2.08253500 | 2.31490800  |
| Se | 4.56984400  | 0.64549900  | -0.46416600 |
| Se | 1.92887500  | 4.35597400  | -1.02551500 |
| Cd | -0.73999500 | 4.22380300  | -1.32221400 |
| Cd | 1.17308400  | 3.89329900  | 1.51594200  |
| Cd | -2.93646400 | 2.86083100  | 2.08258900  |
| Cd | 0.20978500  | 0.99632400  | 4.26717500  |
| Cd | -4.01254400 | 1.79404400  | -1.91235700 |
| Cd | -4.84208600 | -0.57949800 | 0.43485000  |
| Cd | -2.50797700 | -1.03366700 | 3.80289900  |
| Cd | -2.46933700 | -3.90801600 | 0.95263900  |
| Cd | 1.45450300  | -3.34154300 | 3.18013700  |
| Cd | 3.54865400  | 0.57481100  | 2.02313100  |
| Cd | -2.78613500 | -2.15718100 | -2.94726500 |
| Cd | 2.88021800  | 2.05352600  | -1.93530000 |
| Cd | -0.63595500 | 1.30185800  | -4.23191200 |
| Cd | 1.34936300  | -1.47017300 | -3.77557000 |
| Cd | 0.34708100  | -4.30897400 | -0.94803000 |
| Cd | 3.64796500  | -1.88510300 | -0.35301100 |
| C  | 4.16913200  | -5.42785300 | 4.48685600  |

|   |            |             |            |
|---|------------|-------------|------------|
| C | 3.17518700 | -5.15631700 | 5.61956700 |
| C | 2.24077200 | -6.32072200 | 5.90051100 |
| O | 2.86644400 | -7.50373500 | 5.83462100 |
| O | 1.07635200 | -6.19435400 | 6.19276700 |
| N | 2.35946000 | -3.97211000 | 5.38159300 |
| H | 4.79799700 | -4.54364000 | 4.34165700 |
| H | 4.81716700 | -6.26559300 | 4.75184500 |
| H | 3.77573400 | -5.05284500 | 6.54013300 |
| H | 1.52221400 | -4.00226700 | 5.96319400 |
| H | 2.86810900 | -3.12769600 | 5.62777700 |
| S | 3.41085400 | -5.71616200 | 2.86208600 |
| H | 2.22139200 | -8.18666200 | 6.07509600 |
| H | 2.78526200 | -6.86791600 | 3.17115700 |

(CdSe)<sub>19</sub>

|    |             |             |             |
|----|-------------|-------------|-------------|
| Cd | 0.33733000  | -0.73490600 | 3.59778300  |
| Se | -2.06552900 | -2.03779200 | 3.25675900  |
| Se | 0.82267800  | 1.94463900  | 3.62853900  |
| Cd | 4.51233000  | -0.78899300 | 1.63000900  |
| Cd | 2.64931400  | 3.00150200  | 1.99962700  |
| Cd | -1.44758400 | 3.13926300  | 3.06677600  |
| Cd | -3.88331600 | -0.39009300 | 2.21604200  |
| Cd | 2.08384200  | -4.12863900 | 0.74498100  |
| Cd | -2.05742600 | -4.18141700 | 1.74791700  |
| Se | -0.01410300 | -5.73890400 | 0.97552700  |
| Se | 5.02342400  | 1.84513600  | 1.81326800  |
| Se | -3.94705000 | 2.16162800  | 2.93447500  |
| Se | 2.48994100  | -2.19379800 | 2.51940000  |
| Se | 3.49839900  | -4.83462100 | -1.39600300 |
| Se | 6.23861100  | -1.13875300 | -0.44925200 |
| Cd | 4.77375500  | -2.56799100 | -2.07018800 |
| Se | 2.50926600  | 5.20734000  | 0.52281500  |
| Se | -2.05239200 | 5.39585300  | 1.68106900  |
| Se | -5.76163300 | -0.91958700 | 0.40645300  |
| Cd | -0.10626000 | 5.42768700  | -0.06223000 |
| Cd | -4.74628100 | -2.93527700 | -1.05599800 |
| Cd | -3.74233300 | 3.55467200  | 0.64867000  |
| Cd | -1.36675400 | -5.33512500 | -1.31499000 |
| Cd | 5.28076500  | 1.35899600  | -0.81990400 |
| Se | -3.78026600 | -5.16873100 | -0.10633300 |
| Se | -4.01586800 | 2.94217500  | -1.92349400 |
| Cd | -4.75932900 | 0.42044300  | -1.69513800 |
| Se | 4.05083800  | 2.28179700  | -2.99097100 |
| Cd | 2.42496800  | 4.05122000  | -1.90036000 |
| Se | -0.71596100 | -4.30738500 | -3.67935500 |
| Cd | 1.85451900  | -3.85552100 | -3.28141000 |
| Cd | -1.42455400 | 2.64073300  | -2.58409200 |
| Se | -0.01035700 | 4.86708100  | -2.71391100 |
| Se | -4.34040000 | -1.62662400 | -3.39589400 |
| Cd | -1.70678000 | -1.82309800 | -3.38103500 |
| Se | 3.44677800  | -1.96997400 | -4.36006200 |
| Cd | 2.34414700  | 0.25263000  | -3.45642700 |
| Se | -0.20037000 | 0.25695400  | -2.61244600 |
| C  | -0.81518300 | -1.25161700 | 7.12641100  |
| C  | 0.65603900  | -1.61364400 | 6.93610200  |
| C  | 1.55770200  | -0.46021100 | 7.34847800  |
| O  | 1.27106700  | 0.34661300  | 8.19978400  |
| O  | 2.72652200  | -0.47223100 | 6.69670800  |

|   |             |             |            |
|---|-------------|-------------|------------|
| N | 0.93852500  | -2.04780400 | 5.56917400 |
| S | -1.38942100 | 0.14393000  | 6.11318300 |
| H | -1.44137000 | -2.09926800 | 6.83240900 |
| H | -1.00567300 | -1.03470800 | 8.17906900 |
| H | -0.68726700 | 1.08800100  | 6.76825800 |
| H | 0.88328100  | -2.41610600 | 7.65979400 |
| H | 0.46831100  | -2.93075300 | 5.38266600 |
| H | 1.93397600  | -2.21139100 | 5.42733000 |
| H | 3.25057800  | 0.28213500  | 7.00786600 |

### Cartesian coordinates of CdSe-cys clusters in water

#### (CdSe)<sub>1</sub>

|    |             |             |             |
|----|-------------|-------------|-------------|
| C  | 3.62794400  | 0.93748100  | 0.06995900  |
| C  | 3.18517000  | 0.48600100  | 1.46681400  |
| C  | 1.72496900  | 0.02818000  | 1.47352900  |
| O  | 1.27389900  | -0.77341600 | 0.66408900  |
| O  | 1.01282000  | 0.55541800  | 2.43836200  |
| N  | 3.32934700  | 1.48069500  | 2.52258600  |
| S  | 2.95184500  | 2.55176100  | -0.44541800 |
| H  | 4.71599400  | 1.03715500  | 0.06571300  |
| H  | 3.35454000  | 0.17987500  | -0.66845600 |
| H  | 3.77093200  | -0.40536400 | 1.72480600  |
| H  | 3.37941200  | 2.42001800  | 2.13414600  |
| H  | 4.14416300  | 1.31950800  | 3.10179700  |
| H  | 1.69743200  | 1.13432300  | 2.91002200  |
| Se | -0.04113700 | 1.53559800  | -2.52432100 |
| Cd | -0.55979100 | -0.37675700 | -0.90101800 |
| H  | 1.81177300  | 2.10746700  | -1.11352300 |

#### (CdSe)<sub>2</sub>

|    |             |             |             |
|----|-------------|-------------|-------------|
| Cd | -2.11523300 | -2.33138700 | -0.48069100 |
| Se | 0.34735800  | -3.03821700 | -1.37554000 |
| Se | -2.67245900 | 0.20390300  | -1.27718200 |
| Cd | -0.12394600 | -0.38692700 | -2.00966600 |
| C  | 3.48797900  | -0.95284600 | 1.31298800  |
| C  | 4.01574400  | 0.00328500  | 0.23852900  |
| C  | 2.99448200  | 0.19577000  | -0.88541100 |
| O  | 1.81210300  | 0.42820500  | -0.67659100 |
| O  | 3.51218300  | 0.10540000  | -2.08766200 |
| N  | 5.27849500  | -0.37578400 | -0.38087700 |
| S  | 3.47161200  | -2.70754200 | 0.81854500  |
| H  | 4.14142600  | -0.89756600 | 2.18700800  |
| H  | 2.48538800  | -0.64625000 | 1.61913000  |
| H  | 2.33180900  | -2.70063700 | 0.04150400  |
| H  | 4.12371800  | 0.99137500  | 0.70374400  |
| H  | 6.06761100  | 0.12655500  | 0.00700800  |
| H  | 5.44174700  | -1.37583300 | -0.28021400 |
| H  | 4.48344700  | -0.08738200 | -1.88672800 |

#### (CdSe)<sub>3</sub>

|    |             |             |             |
|----|-------------|-------------|-------------|
| C  | 4.92280100  | -0.41849200 | 1.67875600  |
| C  | 5.22563000  | 0.63313600  | 0.60825600  |
| C  | 3.94640100  | 1.08424400  | -0.10271800 |
| O  | 2.91214700  | 1.35072800  | 0.49081700  |
| O  | 4.07485800  | 1.17359300  | -1.40750200 |
| N  | 6.18403400  | 0.24372900  | -0.41681500 |
| S  | 4.50897100  | -2.06750700 | 1.02102400  |
| H  | 5.81326500  | -0.56662800 | 2.29463100  |
| H  | 4.11751500  | -0.06371500 | 2.32529900  |
| H  | 3.25842300  | -1.79560800 | 0.53461800  |
| H  | 5.59713500  | 1.52752400  | 1.12458900  |
| H  | 7.11703700  | 0.58807200  | -0.22542400 |
| H  | 6.22026100  | -0.77011600 | -0.50599200 |
| H  | 5.02632300  | 0.87241800  | -1.55080500 |
| Cd | -1.47707900 | -2.04219300 | 0.08390200  |
| Cd | -2.82978100 | 1.08559800  | 0.18297900  |
| Cd | 0.58074700  | 0.94985600  | -0.47056200 |

|                     |             |             |             |
|---------------------|-------------|-------------|-------------|
| Se                  | -1.10213600 | 2.99331000  | -0.34626200 |
| Se                  | -3.98554100 | -1.27634400 | 0.47153100  |
| Se                  | 1.03121600  | -1.67764600 | -0.69378500 |
| (CdSe) <sub>4</sub> |             |             |             |
| Cd                  | 3.52798500  | -0.24173000 | -0.93850300 |
| Cd                  | 0.46191800  | -0.19332500 | -5.27937000 |
| Cd                  | 2.39004600  | 2.34977200  | -3.50449800 |
| Cd                  | 1.88728200  | -3.00490300 | -3.03864800 |
| Se                  | 3.90317100  | 2.33044700  | -1.36858100 |
| Se                  | 0.87782400  | 2.36534700  | -5.64614400 |
| Se                  | 3.59969700  | -2.90261100 | -1.03540200 |
| Se                  | 0.04642000  | -2.74953200 | -4.91295400 |
| C                   | 1.69469000  | -2.52113600 | 3.22412700  |
| C                   | 2.67992500  | -1.43807100 | 3.67033000  |
| C                   | 3.28124000  | -0.70197500 | 2.46836400  |
| O                   | 2.61712200  | -0.30696700 | 1.52373600  |
| O                   | 4.58160900  | -0.52071200 | 2.56334500  |
| N                   | 3.78300200  | -1.88948500 | 4.50821700  |
| S                   | 2.47856700  | -3.99932600 | 2.50029600  |
| H                   | 1.14197400  | -2.87996500 | 4.09588900  |
| H                   | 0.97710500  | -2.09961600 | 2.51710800  |
| H                   | 2.80604500  | -3.48397600 | 1.27110400  |
| H                   | 2.10564600  | -0.67769300 | 4.21524200  |
| H                   | 3.60895100  | -1.73482400 | 5.49377300  |
| H                   | 3.96436000  | -2.88045100 | 4.35899800  |
| H                   | 4.79822200  | -0.96806900 | 3.43971000  |
| (CdSe) <sub>5</sub> |             |             |             |
| Cd                  | -2.12926300 | 1.42610700  | 3.66930200  |
| Cd                  | 0.54130400  | 0.63806400  | 2.05758500  |
| Cd                  | -1.97715600 | -2.30946800 | 2.59977600  |
| Se                  | 0.79198500  | -2.11184800 | 2.63687500  |
| Se                  | 0.23541400  | 2.57492700  | 3.93115900  |
| Se                  | -3.94632400 | -0.33623700 | 2.81169800  |
| Se                  | -0.42926400 | 0.63128300  | -0.59099600 |
| Se                  | -2.74679400 | -3.30659100 | -0.02866400 |
| Cd                  | -0.18190800 | -2.14338500 | -0.05886400 |
| Cd                  | -2.95048900 | -0.46270200 | 0.11095500  |
| C                   | -2.88188700 | 2.73619100  | -3.85328200 |
| C                   | -3.76190400 | 1.51951100  | -4.15252200 |
| C                   | -3.75448900 | 0.51703400  | -2.99303000 |
| O                   | -3.89385200 | 0.84574000  | -1.82281000 |
| O                   | -3.60422200 | -0.72706300 | -3.38257800 |
| N                   | -3.42942500 | 0.78256600  | -5.36460100 |
| S                   | -1.09047800 | 2.41273100  | -3.94972300 |
| H                   | -3.07955200 | 3.50836500  | -4.60073100 |
| H                   | -3.13196700 | 3.14181000  | -2.87081700 |
| H                   | -0.94196700 | 1.75074700  | -2.76135900 |
| H                   | -4.79826800 | 1.87419700  | -4.22064700 |
| H                   | -4.02534800 | 1.02876900  | -6.14544100 |
| H                   | -2.45869100 | 0.94301300  | -5.62749700 |
| H                   | -3.51659400 | -0.62644600 | -4.38479000 |
| (CdSe) <sub>6</sub> |             |             |             |
| Cd                  | 0.87019700  | 2.20861100  | -1.59498900 |
| Cd                  | -2.26429200 | 0.17270400  | 0.05653400  |
| Cd                  | 1.59478400  | -1.60026300 | -0.99028300 |

|    |             |             |             |
|----|-------------|-------------|-------------|
| Se | -1.78981900 | 2.59434500  | -1.19846500 |
| Se | 2.72769300  | 0.42261900  | -2.47670600 |
| Se | -0.95795600 | -2.25634700 | -0.20265500 |
| Se | 2.18978500  | 3.42575100  | 0.99469400  |
| Se | -1.67333700 | 0.77609400  | 2.85651400  |
| Se | 2.87486700  | -1.54222500 | 1.68237700  |
| Cd | -0.43802700 | 2.72674500  | 1.35552000  |
| Cd | 3.08089600  | 0.90378900  | 0.43068700  |
| Cd | 0.23485400  | -0.99028100 | 2.07543500  |
| C  | -4.98325400 | -3.68895300 | -1.73454500 |
| C  | -5.75551400 | -3.00626300 | -0.60051200 |
| C  | -4.95338800 | -1.85838100 | 0.02486800  |
| O  | -4.38982500 | -0.99690800 | -0.63594300 |
| O  | -4.95386300 | -1.87903700 | 1.33702700  |
| N  | -6.18341200 | -3.87979300 | 0.48381600  |
| S  | -3.65550300 | -4.80940500 | -1.18299600 |
| H  | -5.67264100 | -4.31774000 | -2.30320300 |
| H  | -4.57522700 | -2.93502300 | -2.41105700 |
| H  | -2.73524100 | -3.86416700 | -0.81781000 |
| H  | -6.63583300 | -2.52937500 | -1.04961000 |
| H  | -5.61200000 | -4.72259100 | 0.51101200  |
| H  | -7.15773500 | -4.14533900 | 0.40873000  |
| H  | -5.50627300 | -2.70238600 | 1.53578500  |

(CdSe)<sub>7</sub>

|    |             |             |             |
|----|-------------|-------------|-------------|
| C  | 6.03922300  | 2.19914100  | -2.78341900 |
| C  | 6.52405300  | 2.90191900  | -1.51666900 |
| C  | 5.48844700  | 2.85176100  | -0.38862300 |
| O  | 4.79980400  | 1.87025600  | -0.15366100 |
| O  | 5.44343800  | 3.95542300  | 0.32324800  |
| N  | 6.93035100  | 4.29299900  | -1.66814200 |
| S  | 4.67787300  | 3.05994300  | -3.64090400 |
| H  | 6.86683500  | 2.14845400  | -3.49494500 |
| H  | 5.72776300  | 1.17865200  | -2.55162700 |
| H  | 7.38322100  | 2.33280000  | -1.13604000 |
| H  | 6.39886400  | 4.74639100  | -2.40863000 |
| H  | 7.91724500  | 4.38637500  | -1.87614500 |
| H  | 6.09014300  | 4.55494600  | -0.16102100 |
| Se | 0.23387800  | -3.15878100 | -0.54150100 |
| Se | -3.15374500 | -1.73379800 | 1.83530800  |
| Cd | -0.35978500 | -1.59044000 | 1.67196100  |
| Cd | -2.56389400 | -2.96877000 | -0.67708600 |
| Se | 1.42026100  | 4.28400500  | 1.04258900  |
| Se | 1.13683300  | 0.40746800  | 2.76784900  |
| Cd | -0.51608000 | 2.56620800  | 2.18938100  |
| Cd | 2.38217000  | 1.65472700  | 0.60108900  |
| Cd | -0.22133000 | -0.84581500 | -2.01987200 |
| Cd | -0.11037600 | 3.15377500  | -1.04616900 |
| Cd | -3.18019100 | 0.25034500  | -0.11483100 |
| Se | -2.52626600 | 2.87989300  | 0.29320600  |
| Se | 1.61305900  | 1.19751300  | -2.05343000 |
| Se | -2.91100900 | -0.96203100 | -2.65587900 |
| H  | 3.64198000  | 2.47515800  | -2.97566400 |

(CdSe)<sub>8</sub>

|    |             |             |            |
|----|-------------|-------------|------------|
| Se | -4.79021600 | 0.60324200  | 1.16795700 |
| Cd | -3.44903700 | -1.78406300 | 1.43831300 |
| Se | -0.88274700 | -2.55530100 | 2.17482600 |

|    |             |             |             |
|----|-------------|-------------|-------------|
| Cd | 0.42088000  | -0.17696200 | 2.46423700  |
| Se | -0.58281200 | 2.44250600  | 2.47101500  |
| Cd | -2.52798000 | 2.14339400  | 0.60597200  |
| Se | -2.39571300 | 2.04939700  | -2.18164600 |
| Cd | -3.97015900 | -0.11337700 | -1.49383400 |
| Se | -3.54477400 | -2.81600900 | -1.28636600 |
| Cd | -0.90561800 | -2.40040300 | -0.64107400 |
| Se | 1.07976600  | -1.29204700 | -2.16058700 |
| Cd | 0.27686900  | 1.38281400  | -2.19184500 |
| Se | 3.13062600  | 0.43314800  | 2.09374100  |
| Cd | 1.77174700  | 2.63972600  | 0.94515900  |
| Se | 2.15858400  | 3.25859300  | -1.63340100 |
| Cd | 2.98770500  | -0.53889600 | -0.40077700 |
| C  | 4.67222900  | -2.81836900 | -4.63871100 |
| C  | 5.57149500  | -1.62815800 | -4.29343400 |
| C  | 5.10337900  | -0.90905500 | -3.02273000 |
| O  | 4.77677700  | -1.49388000 | -1.99954000 |
| O  | 5.10829500  | 0.39932500  | -3.13410600 |
| N  | 5.71433900  | -0.62039000 | -5.33577300 |
| S  | 3.04946100  | -2.36412800 | -5.33396500 |
| H  | 5.16098000  | -3.41749600 | -5.41085600 |
| H  | 4.53399800  | -3.44793300 | -3.75738300 |
| H  | 2.43763000  | -1.97268000 | -4.17738300 |
| H  | 6.56235600  | -2.03048900 | -4.04648900 |
| H  | 6.56312000  | -0.73753700 | -5.87555900 |
| H  | 4.91665500  | -0.64383700 | -5.96866300 |
| H  | 5.41037500  | 0.53264600  | -4.08834000 |

(CdSe)<sub>9</sub>

|    |             |             |             |
|----|-------------|-------------|-------------|
| Se | 2.71500700  | -1.12729400 | 2.23385800  |
| Cd | 2.57732700  | -0.45460900 | -0.47040800 |
| Se | 2.20121800  | 2.18734500  | -1.15961500 |
| Se | 1.22986800  | -2.75980700 | -1.39736000 |
| Cd | -1.21725700 | -1.88047700 | -2.22635400 |
| Cd | -0.43599500 | 2.24206200  | -2.11967600 |
| Se | -1.97689300 | 0.48642200  | -3.55244400 |
| Cd | -3.92449300 | 0.18081100  | -1.63859400 |
| Se | -4.54254800 | 0.94762800  | 0.93901900  |
| Cd | -2.39216700 | 2.55278500  | 1.43509900  |
| Cd | -3.20237800 | -1.48347100 | 1.20806800  |
| Se | -0.35079700 | 2.51316100  | 3.30802400  |
| Cd | 0.33742400  | -0.12554000 | 3.23113200  |
| Se | -1.38438300 | 4.28983000  | -0.47921900 |
| Se | -3.67532000 | -2.66804300 | -1.24308600 |
| Cd | 0.71540600  | -2.90555200 | 1.32213000  |
| Cd | 0.88603700  | 3.36931100  | 0.96968000  |
| Se | -1.39988300 | -2.36565900 | 3.04225700  |
| C  | 5.10615900  | -3.74046300 | -3.59670400 |
| C  | 5.23439000  | -2.29864800 | -4.09502700 |
| C  | 4.41720800  | -1.32766700 | -3.23233900 |
| O  | 4.45331600  | -1.32402000 | -2.01105000 |
| O  | 3.69471000  | -0.49008300 | -3.94178200 |
| N  | 4.85347700  | -2.07768500 | -5.48416400 |
| S  | 3.50843400  | -4.53202600 | -3.97713700 |
| H  | 5.86005400  | -4.35646900 | -4.09301900 |
| H  | 5.29037600  | -3.77790300 | -2.52108000 |
| H  | 2.74034100  | -3.87275200 | -3.05790500 |
| H  | 6.28022500  | -1.99745800 | -3.95585200 |

|   |            |             |             |
|---|------------|-------------|-------------|
| H | 5.65280100 | -2.02186600 | -6.10337000 |
| H | 4.23332300 | -2.81639700 | -5.81059700 |
| H | 3.91026000 | -0.77194500 | -4.88773900 |

(CdSe)<sub>10</sub>

|    |            |             |              |
|----|------------|-------------|--------------|
| Cd | 5.62199700 | 6.28316100  | -1.65388400  |
| Se | 6.63731300 | 7.07410100  | -4.11243300  |
| Cd | 6.04349100 | 4.61750500  | -5.37786800  |
| Se | 3.61237300 | 3.32005400  | -5.10627500  |
| Cd | 2.36978300 | 4.20955800  | -2.82597000  |
| Se | 2.99272500 | 6.30619800  | -0.98160000  |
| Se | 8.71129500 | 3.58958100  | -5.37606000  |
| Cd | 8.02566100 | 1.20398700  | -4.31448600  |
| Se | 6.46594000 | -0.65801400 | -5.61158700  |
| Cd | 4.17555200 | 0.64603500  | -4.76221600  |
| Se | 0.91344500 | 2.64295400  | -1.06591100  |
| Cd | 2.95740400 | 0.76335400  | -0.90074600  |
| Se | 3.25372600 | -1.13092500 | -2.80298700  |
| Cd | 8.44129700 | 5.05055600  | -3.08839500  |
| Cd | 6.04418800 | -1.30419700 | -2.86992100  |
| Cd | 2.89485500 | 3.98015200  | 0.45949700   |
| Cd | 6.79169300 | 2.33864900  | -0.41267000  |
| Se | 7.76733100 | 4.95895500  | -0.43978800  |
| Se | 4.51901400 | 1.85637100  | 1.10572300   |
| Se | 8.02892100 | 0.22184700  | -1.67961800  |
| C  | 5.54198800 | 8.57258100  | -8.56878800  |
| C  | 6.15825300 | 7.46077500  | -9.41818700  |
| C  | 6.46392400 | 6.21353900  | -8.58301600  |
| O  | 5.70279700 | 5.77481500  | -7.73692000  |
| O  | 7.61098300 | 5.64593500  | -8.89064400  |
| N  | 7.36875100 | 7.80841400  | -10.14962200 |
| S  | 6.70136400 | 9.34948500  | -7.39404300  |
| H  | 5.20511800 | 9.37636600  | -9.22812200  |
| H  | 4.67400000 | 8.19174800  | -8.02701800  |
| H  | 5.39450600 | 7.13955500  | -10.13898300 |
| H  | 7.87987000 | 8.54772900  | -9.67165500  |
| H  | 7.17421700 | 8.10969800  | -11.09684900 |
| H  | 7.98169000 | 6.26523500  | -9.59034300  |
| H  | 6.63925500 | 8.42065200  | -6.40119800  |

(CdSe)<sub>13</sub>

|    |             |             |             |
|----|-------------|-------------|-------------|
| Se | -4.72497500 | -0.97751200 | -1.55973000 |
| Se | -2.75788700 | 3.45400900  | -0.44002100 |
| Se | -4.00807600 | 0.46542200  | 3.07802400  |
| Cd | -3.14745200 | 1.19219500  | -2.08191800 |
| Cd | -4.06436900 | -1.45928800 | 1.14497300  |
| Cd | -1.89191200 | 1.68784700  | 1.43082500  |
| Cd | -2.74575100 | -2.92315400 | -1.66368100 |
| Cd | -1.47750200 | -0.06669400 | 4.01680100  |
| Cd | -0.33018300 | 3.10521700  | -1.73443400 |
| Se | -2.73060300 | -3.89654000 | 0.95257300  |
| Se | 0.14539000  | 2.27658700  | 3.53031600  |
| Se | -1.00983300 | 1.46489700  | -3.86802700 |
| Se | -0.80199700 | -3.21821400 | -3.54594700 |
| Se | 2.21500300  | 3.62235700  | -0.85042000 |
| Se | 0.05560700  | -2.27698600 | 4.47966600  |
| Cd | 0.23386000  | -0.70352000 | -2.64487000 |
| Cd | 1.64235300  | 1.72272100  | 1.21510400  |



|    |             |             |             |
|----|-------------|-------------|-------------|
| Cd | -0.23715200 | -2.87811000 | 1.72232300  |
| Se | -0.14982500 | -0.32649400 | 0.22636800  |
| Se | 3.09765400  | -0.99778400 | -2.58359100 |
| Se | 2.10271800  | -4.18328200 | 0.72296300  |
| Se | 3.97854800  | 0.14461300  | 2.06737100  |
| Cd | 0.92122800  | -3.96479100 | -1.64930300 |
| Cd | 3.21089300  | 1.68892100  | -2.41479000 |
| Cd | 1.79856600  | -0.35116200 | 3.64396600  |
| Cd | 2.96860200  | -1.58928000 | 0.16569200  |
| C  | 6.87399300  | -0.28809500 | -5.24422700 |
| C  | 6.29132700  | 0.95004500  | -5.93090200 |
| C  | 5.15194200  | 1.56122900  | -5.10931500 |
| O  | 5.22679500  | 1.75605600  | -3.90361400 |
| O  | 4.09636400  | 1.86650300  | -5.82591800 |
| N  | 5.78873200  | 0.74537300  | -7.28311400 |
| S  | 5.80031300  | -1.75985800 | -5.30804900 |
| H  | 7.79461900  | -0.57662100 | -5.75729500 |
| H  | 7.12188300  | -0.05486700 | -4.20671200 |
| H  | 4.88743900  | -1.38746800 | -4.36215200 |
| H  | 7.07831400  | 1.71458300  | -5.95034300 |
| H  | 6.44452000  | 1.04988700  | -7.99211000 |
| H  | 5.56391500  | -0.23511100 | -7.44100200 |
| H  | 4.37536800  | 1.56886000  | -6.75135100 |

(CdSe)<sub>16</sub>

|    |             |             |             |
|----|-------------|-------------|-------------|
| Se | 1.53753700  | -1.26647000 | 4.70731500  |
| Se | -1.53375300 | 1.47173200  | 4.70430000  |
| Se | 2.79374600  | 3.18361600  | 2.79594500  |
| Se | -1.70617300 | 4.97732800  | 1.46489800  |
| Se | 1.23585400  | 5.02720200  | -1.53834600 |
| Se | -3.07979800 | 3.02389700  | -2.99022400 |
| Se | -4.91289000 | 1.46015900  | 1.34350200  |
| Se | -4.89536500 | -1.48133200 | -1.64806700 |
| Se | -2.90636100 | -2.86070500 | 2.78988300  |
| Se | 1.59940400  | -4.68205300 | 1.38607000  |
| Se | 4.79510300  | -1.09956200 | 1.30673300  |
| Se | 2.94262800  | -2.68482200 | -3.02410300 |
| Se | -1.39381800 | -4.70902100 | -1.54520300 |
| Se | -1.45434900 | -1.37014800 | -4.93616900 |
| Se | 1.27820600  | 1.68505200  | -4.93301700 |
| Se | 4.75132200  | 1.82103800  | -1.67405700 |
| Cd | 4.13364600  | 1.58611400  | 1.03688500  |
| Cd | 4.20160200  | -0.89739300 | -1.40862000 |
| Cd | 2.80159300  | -2.50558700 | 2.59151300  |
| Cd | 1.30040700  | -4.04960000 | -1.31894600 |
| Cd | 1.16412200  | 1.42016400  | 4.07204500  |
| Cd | -1.15852200 | -1.21802400 | 4.07070300  |
| Cd | -1.14014800 | -4.12977600 | 1.16492100  |
| Cd | -4.26589900 | -1.23516600 | 1.05965500  |
| Cd | -2.64130200 | -2.56756400 | -2.75824300 |
| Cd | 1.23142100  | -1.01068500 | -4.30621600 |
| Cd | -2.75634400 | 2.68784700  | 2.54953300  |
| Cd | 2.47528100  | 2.88785300  | -2.75970400 |
| Cd | 1.00908100  | 4.44012100  | 1.18139500  |
| Cd | -1.45820700 | 4.36981200  | -1.24990300 |
| Cd | -4.33899100 | 1.23749200  | -1.37622300 |
| Cd | -1.40999700 | 1.32081200  | -4.29650800 |
| C  | 4.32492000  | -7.08771300 | 4.45191400  |

|   |            |             |            |
|---|------------|-------------|------------|
| C | 5.56610500 | -6.20260900 | 4.56578500 |
| C | 5.32288100 | -4.80080500 | 3.99447500 |
| O | 4.30371300 | -4.16221400 | 4.19347300 |
| O | 6.34256600 | -4.34392400 | 3.29504100 |
| N | 6.78087600 | -6.72514100 | 3.95382400 |
| S | 3.91646900 | -7.59289300 | 2.74688300 |
| H | 4.50052800 | -8.01441700 | 5.00371300 |
| H | 3.46475800 | -6.58447000 | 4.89770700 |
| H | 5.75544800 | -6.04360800 | 5.63565200 |
| H | 6.55834600 | -7.34702200 | 3.17950100 |
| H | 7.36169500 | -7.22649800 | 4.61496600 |
| H | 6.98658300 | -5.11551900 | 3.31799200 |
| H | 3.22352900 | -6.48285200 | 2.36628700 |

(CdSe)<sub>19</sub>

|    |             |             |             |
|----|-------------|-------------|-------------|
| Cd | -0.10914100 | -1.47129800 | 2.86844400  |
| Se | -2.66839400 | -2.43676200 | 2.70420900  |
| Se | 0.68562500  | 1.00102100  | 3.88724500  |
| Cd | 4.31636200  | -1.81665900 | 1.58273000  |
| Cd | 2.83744500  | 2.05851900  | 2.51066900  |
| Cd | -1.47001700 | 2.64357600  | 3.42974100  |
| Cd | -4.39378200 | -0.45977000 | 1.82945200  |
| Cd | 1.54929000  | -5.00190100 | -0.04694600 |
| Cd | -2.73531500 | -4.44485900 | 0.85329600  |
| Se | -0.90578700 | -6.23062500 | -0.20694100 |
| Se | 5.20026700  | 0.73422200  | 2.15709000  |
| Se | -4.13185600 | 1.95380400  | 3.14607900  |
| Se | 1.92895200  | -3.11083700 | 1.91482200  |
| Se | 3.06075200  | -5.55981100 | -2.25558800 |
| Se | 6.08694300  | -2.16286900 | -0.57170800 |
| Cd | 4.56981300  | -3.25460900 | -2.52913600 |
| Se | 2.86229600  | 4.45984200  | 1.18714800  |
| Se | -1.68549500 | 5.16778200  | 2.27950900  |
| Se | -6.28462100 | -0.46770500 | -0.14607700 |
| Cd | 0.29205100  | 5.16343900  | 0.41467400  |
| Cd | -5.32299900 | -2.38852700 | -1.91325200 |
| Cd | -3.63732200 | 3.61008500  | 0.97064300  |
| Cd | -2.20178900 | -5.14628600 | -2.41791700 |
| Cd | 5.42114200  | 0.52816800  | -0.63868100 |
| Se | -4.66869600 | -4.90502300 | -1.14696300 |
| Se | -3.76025400 | 3.48729400  | -1.75884800 |
| Cd | -4.94769900 | 1.07319100  | -2.03039300 |
| Se | 4.40968900  | 1.94606600  | -2.74330300 |
| Cd | 2.85058300  | 3.75963300  | -1.47814000 |
| Se | -1.14895500 | -4.02438200 | -4.66333600 |
| Cd | 1.50584200  | -4.03729900 | -4.00839100 |
| Cd | -1.16726500 | 2.86055000  | -2.50594100 |
| Se | 0.53104400  | 5.01999200  | -2.34293600 |
| Se | -4.57964300 | -0.80553800 | -4.05548800 |
| Cd | -1.90557400 | -1.44569800 | -3.93206500 |
| Se | 3.33420500  | -2.08312300 | -4.72924500 |
| Cd | 2.43392200  | 0.18562900  | -3.48938200 |
| Se | -0.19996300 | 0.22639700  | -2.51825900 |
| C  | 1.67069600  | -4.45380600 | 6.61549000  |
| C  | 1.17827200  | -3.16357500 | 7.27835800  |
| C  | 0.84639300  | -2.14020900 | 6.21000700  |
| O  | 0.19821300  | -2.45530300 | 5.22015800  |
| O  | 1.27775900  | -0.92074500 | 6.45568600  |

|   |            |             |            |
|---|------------|-------------|------------|
| N | 2.13184000 | -2.66703900 | 8.25161500 |
| S | 3.16497500 | -4.27914100 | 5.58174400 |
| H | 1.92435600 | -5.17316400 | 7.39895200 |
| H | 0.87214400 | -4.88863500 | 6.01200400 |
| H | 2.56010500 | -3.90796100 | 4.42104900 |
| H | 0.19678500 | -3.41143200 | 7.72401100 |
| H | 2.16011700 | -3.29793600 | 9.04628600 |
| H | 1.84185000 | -1.76079800 | 8.60380600 |
| H | 1.03453000 | -0.30517600 | 5.70450100 |

### Cartesian coordinates of CdSe-cys clusters in toluene

|                     |             |             |             |
|---------------------|-------------|-------------|-------------|
| (CdSe) <sub>1</sub> |             |             |             |
| C                   | -2.86633200 | -1.08899000 | 0.51274700  |
| C                   | -2.58026600 | 0.36773400  | 0.86259200  |
| C                   | -2.74598600 | 1.26470200  | -0.35622700 |
| O                   | -3.43230300 | 0.98531000  | -1.31133800 |
| O                   | -2.07737600 | 2.41195500  | -0.22292900 |
| N                   | -1.25542800 | 0.53335500  | 1.46176300  |
| S                   | -1.67214700 | -1.84977100 | -0.63351000 |
| H                   | -2.83035300 | -1.69949700 | 1.41929500  |
| H                   | -3.86737500 | -1.17855500 | 0.08829700  |
| H                   | -3.37283900 | 0.68874800  | 1.55919200  |
| H                   | -1.23986300 | 0.11966600  | 2.39088700  |
| H                   | -1.04162500 | 1.52110600  | 1.58009600  |
| H                   | -2.22860900 | 2.95896300  | -1.01026400 |
| Se                  | 3.06294900  | 0.03416300  | -0.20740900 |
| Cd                  | 0.65574500  | -0.33643200 | 0.18724900  |
| H                   | -2.05962700 | -1.18131700 | -1.73580100 |
| (CdSe) <sub>2</sub> |             |             |             |
| Cd                  | -0.39317700 | -1.68112800 | -0.48018600 |
| Se                  | 1.21490300  | 0.49455600  | -0.75987900 |
| Se                  | 1.19147400  | -3.84229200 | -0.28927200 |
| Cd                  | 2.66239700  | -1.67834700 | -0.54107500 |
| C                   | -3.94225500 | -1.19038900 | -0.15521300 |
| C                   | -3.20160400 | -0.57533000 | 1.02743200  |
| C                   | -2.83575300 | 0.87925000  | 0.75671800  |
| O                   | -3.31072000 | 1.54500200  | -0.13478800 |
| O                   | -1.96124900 | 1.33636600  | 1.65155200  |
| N                   | -2.00790300 | -1.34312600 | 1.38197200  |
| S                   | -2.97377100 | -1.34538200 | -1.69021200 |
| H                   | -4.25079700 | -2.20921000 | 0.09564300  |
| H                   | -4.84170400 | -0.61173300 | -0.37218800 |
| H                   | -2.88374600 | -0.02768600 | -1.94965900 |
| H                   | -3.91955400 | -0.54088000 | 1.86450000  |
| H                   | -2.26751100 | -2.24262400 | 1.77799700  |
| H                   | -1.47002000 | -0.84837300 | 2.08937100  |
| H                   | -1.69801300 | 2.23707600  | 1.40402600  |
| (CdSe) <sub>3</sub> |             |             |             |
| C                   | 4.51326400  | 1.13783300  | 0.06331400  |
| C                   | 3.74470600  | 0.48237700  | 1.20631800  |
| C                   | 4.01282700  | -1.01401900 | 1.26732600  |
| O                   | 4.96036800  | -1.55796100 | 0.74771800  |
| O                   | 3.09947700  | -1.65053200 | 2.00344500  |
| N                   | 2.30995000  | 0.74606200  | 1.12418900  |
| S                   | 4.00977600  | 0.62611000  | -1.61067900 |
| H                   | 4.35724700  | 2.21986400  | 0.09255300  |
| H                   | 5.58148800  | 0.94848500  | 0.18124200  |
| H                   | 4.43742000  | -0.64680000 | -1.51946000 |
| H                   | 4.17264600  | 0.88402500  | 2.14131800  |
| H                   | 2.11891300  | 1.73292200  | 1.28379200  |
| H                   | 1.81513300  | 0.22549300  | 1.84390200  |
| H                   | 3.29937100  | -2.59995300 | 1.99586400  |
| Cd                  | -1.97958800 | 1.99107300  | -2.34606200 |
| Cd                  | -1.83152300 | -1.41788400 | -2.51003800 |

|    |             |             |             |
|----|-------------|-------------|-------------|
| Cd | 1.15274300  | 0.36172900  | -1.02985400 |
| Se | 0.39937000  | -2.13554800 | -1.45667700 |
| Se | -3.67755200 | 0.25747500  | -3.25960600 |
| Se | 0.14789000  | 2.81867000  | -1.17542100 |

(CdSe)<sub>4</sub>

|    |             |             |             |
|----|-------------|-------------|-------------|
| Se | 0.68750800  | 2.34470400  | -0.99652200 |
| Se | 0.82174800  | -1.90743100 | -1.83377800 |
| Se | -0.35852700 | -0.57062900 | 2.11113400  |
| Cd | 2.42945500  | 0.29048900  | -1.55816000 |
| Cd | 1.50022500  | 1.35992800  | 1.45837700  |
| Cd | -0.87729400 | 0.07628400  | -0.58248800 |
| Cd | 1.62955400  | -1.92970300 | 0.78459200  |
| Se | 3.75170400  | -0.12369300 | 0.81852100  |
| C  | -4.53384700 | 0.61621600  | -0.95602800 |
| C  | -4.07970700 | -0.80223000 | -1.29398600 |
| C  | -4.17069000 | -1.69956700 | -0.06790200 |
| O  | -4.97642700 | -1.54007100 | 0.81989200  |
| O  | -3.29413300 | -2.70471000 | -0.10890700 |
| N  | -2.73700100 | -0.81907300 | -1.87058200 |
| S  | -3.44989700 | 1.50163400  | 0.20717400  |
| H  | -4.54420100 | 1.22376100  | -1.86554400 |
| H  | -5.54927400 | 0.59123700  | -0.55760500 |
| H  | -3.76122300 | 0.77930900  | 1.29908600  |
| H  | -4.82151000 | -1.21344700 | -1.99954400 |
| H  | -2.74512400 | -0.37629100 | -2.78594400 |
| H  | -2.40440400 | -1.77130600 | -2.01101800 |
| H  | -3.39209800 | -3.23210800 | 0.69955400  |

(CdSe)<sub>5</sub>

|    |             |             |             |
|----|-------------|-------------|-------------|
| Cd | 2.99699400  | 2.13709400  | 0.77330600  |
| Cd | 2.46345000  | 0.01845800  | -1.73264200 |
| Cd | 1.24624100  | -1.28102000 | 1.73363500  |
| Se | 2.54500600  | -2.41609900 | -0.39871100 |
| Se | 4.27051300  | 1.94808200  | -1.44866800 |
| Se | 1.10750900  | 1.34486400  | 2.37927100  |
| Se | -0.27047400 | 0.19783600  | -2.24682400 |
| Se | -1.38464900 | -2.00707300 | 1.27864100  |
| Cd | -0.10176800 | -2.30714800 | -1.10370700 |
| Cd | -1.32339700 | 0.54776400  | 0.25827800  |
| C  | -4.47227700 | 2.28687400  | 0.72510200  |
| C  | -3.28724700 | 3.09482000  | 1.25063900  |
| C  | -2.78159600 | 4.05229300  | 0.18163200  |
| O  | -3.49408600 | 4.55206100  | -0.65813200 |
| O  | -1.47666900 | 4.31012900  | 0.30043300  |
| N  | -2.22321700 | 2.22523400  | 1.74302600  |
| S  | -4.05789600 | 1.13543200  | -0.62306100 |
| H  | -4.87462300 | 1.66236700  | 1.52750100  |
| H  | -5.26273100 | 2.96038600  | 0.39108000  |
| H  | -3.67559300 | 3.74569500  | 2.05199400  |
| H  | -2.52976000 | 1.72876800  | 2.57643500  |
| H  | -1.38601600 | 2.74269200  | 2.00850200  |
| H  | -1.22500300 | 4.94271800  | -0.39142600 |
| H  | -3.84845300 | 2.06476600  | -1.57384500 |

(CdSe)<sub>6</sub>

|    |             |             |             |
|----|-------------|-------------|-------------|
| Cd | 1.32620100  | 1.97354500  | -1.51486200 |
| Cd | -1.96072200 | -0.12293600 | -0.00595600 |

|    |             |             |             |
|----|-------------|-------------|-------------|
| Cd | 1.62826900  | -2.06159300 | -1.35819700 |
| Se | -1.18291100 | 2.40615300  | -0.67336500 |
| Se | 2.92737400  | 0.02997900  | -2.48621300 |
| Se | -0.85359900 | -2.58038500 | -0.49036900 |
| Se | 2.78141100  | 2.64117500  | 0.83628900  |
| Se | -0.95348400 | 0.02482200  | 2.89669400  |
| Se | 3.10286400  | -2.36875900 | 1.04007100  |
| Cd | 0.28775000  | 2.08190800  | 1.70403800  |
| Cd | 3.62208100  | 0.15630700  | 0.25411500  |
| Cd | 0.57088600  | -1.90136500 | 1.85532700  |
| C  | -5.37760300 | -1.21785200 | -0.72270000 |
| C  | -5.31286200 | -0.45211100 | 0.59692300  |
| C  | -5.68494000 | 1.00905200  | 0.39942600  |
| O  | -6.40842500 | 1.40736600  | -0.48481900 |
| O  | -5.16197700 | 1.79513400  | 1.34310500  |
| N  | -4.00595900 | -0.58766100 | 1.23324400  |
| S  | -4.16654300 | -0.68655400 | -1.97398600 |
| H  | -5.16192600 | -2.27442500 | -0.54063200 |
| H  | -6.38117900 | -1.14593900 | -1.14492000 |
| H  | -4.73912300 | 0.50260300  | -2.23962300 |
| H  | -6.11396100 | -0.85849000 | 1.23813400  |
| H  | -3.87458700 | -1.53902800 | 1.56813100  |
| H  | -3.91202400 | 0.01749600  | 2.04621600  |
| H  | -5.44062300 | 2.70875300  | 1.17311100  |

(CdSe)<sub>7</sub>

|    |             |             |             |
|----|-------------|-------------|-------------|
| C  | 5.18063300  | 0.27909800  | 2.07414700  |
| C  | 5.04537600  | -0.31041900 | 0.67164100  |
| C  | 6.10844800  | 0.24955800  | -0.26136900 |
| O  | 7.14958200  | 0.74159400  | 0.11150600  |
| O  | 5.78245300  | 0.09398900  | -1.54722300 |
| N  | 3.70244600  | -0.13077100 | 0.12684000  |
| S  | 4.85300600  | 2.06611600  | 2.18900500  |
| H  | 4.44188800  | -0.18480300 | 2.73363000  |
| H  | 6.17613300  | 0.07477700  | 2.47166400  |
| H  | 5.29495900  | -1.38205200 | 0.75505700  |
| H  | 3.07582100  | -0.86173000 | 0.46426200  |
| H  | 3.70902600  | -0.21488300 | -0.88747600 |
| H  | 6.50063600  | 0.44825800  | -2.09463800 |
| Se | 0.83045200  | -2.64372200 | -0.26637900 |
| Se | -2.99141500 | -1.71004300 | 1.51562400  |
| Cd | -0.31127300 | -1.18513000 | 1.79115500  |
| Cd | -1.88530000 | -2.91466200 | -0.68025300 |
| Se | 1.32855400  | 4.49117900  | 0.72275300  |
| Se | 1.04450600  | 0.85486100  | 2.77507900  |
| Cd | -0.51327600 | 2.91930300  | 1.97722800  |
| Cd | 2.46271700  | 1.94906500  | 0.52532400  |
| Cd | 0.19240300  | -0.65941600 | -2.10555800 |
| Cd | -0.15879100 | 3.41216100  | -1.29995600 |
| Cd | -3.07072500 | 0.29120900  | -0.37810800 |
| Se | -2.49998400 | 2.86879800  | 0.06751600  |
| Se | 1.59756800  | 1.57671000  | -2.22184000 |
| Se | -2.43624900 | -1.14087500 | -2.67642700 |
| H  | 5.90802400  | 2.46465000  | 1.45297700  |

(CdSe)<sub>8</sub>

|    |             |             |            |
|----|-------------|-------------|------------|
| Se | -4.54243700 | 0.31073400  | 0.38093500 |
| Cd | -3.20542300 | -1.80221100 | 1.38300500 |

|    |             |             |             |
|----|-------------|-------------|-------------|
| Se | -0.82811000 | -2.12566400 | 2.62042600  |
| Cd | 0.34082100  | 0.26113600  | 2.87140600  |
| Se | -0.75547400 | 2.71369800  | 2.10284000  |
| Cd | -2.39238900 | 1.95973900  | 0.14639100  |
| Se | -1.69972200 | 1.40879600  | -2.48579300 |
| Cd | -3.18320400 | -0.76271700 | -1.82877500 |
| Se | -2.64385300 | -3.24970800 | -0.95265900 |
| Cd | -0.14998200 | -2.67842600 | -0.03960700 |
| Se | 1.88827900  | -1.66087400 | -1.41880800 |
| Cd | 0.91205500  | 0.78634600  | -2.25613200 |
| Se | 2.96827200  | 0.85916700  | 2.58133500  |
| Cd | 1.72468300  | 2.80378300  | 1.03093500  |
| Se | 2.85075000  | 2.47103700  | -1.36230800 |
| Cd | 3.53979400  | 0.05311200  | -0.02651700 |
| C  | 7.07183200  | -0.35108600 | -1.36973200 |
| C  | 6.86839900  | -0.93117700 | 0.02811300  |
| C  | 6.56616100  | -2.41900900 | -0.04854200 |
| O  | 7.03928700  | -3.15619800 | -0.88272800 |
| O  | 5.75950700  | -2.82956500 | 0.93397000  |
| N  | 5.83752900  | -0.20935100 | 0.77009800  |
| S  | 5.58707700  | -0.39000300 | -2.42103700 |
| H  | 7.35069000  | 0.70354800  | -1.28891700 |
| H  | 7.88753300  | -0.87576100 | -1.86963300 |
| H  | 7.84299600  | -0.87193500 | 0.54209400  |
| H  | 6.14823800  | 0.74058600  | 0.95945200  |
| H  | 5.67116300  | -0.63687100 | 1.67871300  |
| H  | 5.59332600  | -1.71715200 | -2.64379600 |
| H  | 5.62768400  | -3.78637900 | 0.84155200  |

(CdSe)<sub>9</sub>

|    |             |             |             |
|----|-------------|-------------|-------------|
| Se | -0.14065400 | 4.20841800  | -0.25436900 |
| Cd | -0.15420000 | 2.30835100  | -2.20214900 |
| Se | -2.07858000 | 0.50224000  | -2.45693800 |
| Se | 2.57743500  | 2.10277600  | -2.68781700 |
| Cd | 3.05431600  | -0.46657500 | -2.06386900 |
| Cd | -0.97164800 | -1.91833000 | -1.92111300 |
| Se | 1.52736800  | -2.74057100 | -2.43139200 |
| Cd | 2.49267500  | -3.11666300 | 0.06451200  |
| Se | 1.55145800  | -2.58242300 | 2.54830900  |
| Cd | -0.95645100 | -1.78897200 | 2.01376300  |
| Cd | 3.03044300  | -0.30451500 | 2.01119400  |
| Se | -2.11951900 | 0.66445900  | 2.43707200  |
| Cd | -0.24834200 | 2.41702200  | 1.77629200  |
| Se | -2.61486900 | -2.75578600 | 0.06597500  |
| Se | 4.59455800  | -1.27316400 | 0.02290300  |
| Cd | 2.46520300  | 3.21080100  | -0.20988300 |
| Cd | -3.34648600 | -0.08344200 | 0.06709400  |
| Se | 2.45464500  | 2.27254100  | 2.35060700  |
| C  | -6.84822100 | 0.85255500  | 0.84399900  |
| C  | -6.53682400 | 0.97495000  | -0.64657500 |
| C  | -6.98592400 | -0.27623000 | -1.38555600 |
| O  | -7.95730800 | -0.92429200 | -1.06861200 |
| O  | -6.21858700 | -0.55319800 | -2.44116900 |
| N  | -5.12576700 | 1.27286400  | -0.88195200 |
| S  | -5.94526100 | -0.48397100 | 1.68838700  |
| H  | -6.55633400 | 1.77497300  | 1.35427000  |
| H  | -7.92091800 | 0.71339700  | 0.98668300  |
| H  | -7.18191500 | 1.77680500  | -1.04364600 |

|   |             |             |             |
|---|-------------|-------------|-------------|
| H | -4.92918700 | 2.23554500  | -0.61922700 |
| H | -4.88417200 | 1.18745200  | -1.86867900 |
| H | -6.56743500 | -1.34652800 | -2.87762500 |
| H | -6.61718500 | -1.50228800 | 1.12023100  |

(CdSe)<sub>10</sub>

|    |             |             |             |
|----|-------------|-------------|-------------|
| Cd | -0.04715200 | 4.23153100  | -0.96976500 |
| Se | 0.97211600  | 4.83625500  | -3.39308500 |
| Cd | 0.51620100  | 2.54511700  | -4.87263800 |
| Se | -1.78233200 | 1.26880900  | -3.91629600 |
| Cd | -3.35060200 | 2.28229500  | -1.97961200 |
| Se | -2.60706200 | 4.24990700  | -0.19957200 |
| Se | 3.16785400  | 1.46457500  | -4.43606600 |
| Cd | 2.44075500  | -0.82379200 | -3.34542200 |
| Se | 0.77216500  | -2.58732400 | -4.58032100 |
| Cd | -1.53965000 | -1.38678400 | -3.80128000 |
| Se | -4.75604400 | 0.72142900  | -0.24753300 |
| Cd | -2.87216700 | -1.21246500 | -0.02969400 |
| Se | -2.27104100 | -3.10984500 | -1.79635200 |
| Cd | 2.84973300  | 3.11579200  | -2.35239800 |
| Cd | 0.44356300  | -3.21900300 | -1.86207100 |
| Cd | -2.80981600 | 2.00433900  | 1.28733300  |
| Cd | 1.16715200  | 0.39653900  | 0.48597400  |
| Se | 2.08138900  | 2.92612300  | 0.23754900  |
| Se | -1.16148400 | -0.07045400 | 1.80453800  |
| Se | 2.39291600  | -1.71105900 | -0.75474400 |
| C  | 0.75311400  | 2.84685200  | -8.52686900 |
| C  | 0.22793500  | 1.46049600  | -8.16898000 |
| C  | -1.29028800 | 1.40482800  | -8.24917600 |
| O  | -1.98417300 | 2.26459600  | -8.73908100 |
| O  | -1.76572100 | 0.25644100  | -7.75553000 |
| N  | 0.68781600  | 1.01978300  | -6.85533100 |
| S  | 0.25660600  | 4.13776100  | -7.32531600 |
| H  | 1.84359100  | 2.81783500  | -8.57532700 |
| H  | 0.36974800  | 3.13141500  | -9.50789000 |
| H  | 0.57906200  | 0.78095700  | -8.96418000 |
| H  | 1.69638500  | 0.87595000  | -6.86032600 |
| H  | 0.27184900  | 0.12319400  | -6.61002400 |
| H  | -2.73311600 | 0.27656700  | -7.82191100 |
| H  | 1.48283900  | 4.62964800  | -7.08133900 |

(CdSe)<sub>13</sub>

|    |             |             |             |
|----|-------------|-------------|-------------|
| Se | -4.71808200 | -1.03236000 | -1.81333600 |
| Se | -3.18926800 | 3.38528900  | -0.44524000 |
| Se | -3.84110700 | -0.05373600 | 2.81178800  |
| Cd | -3.44963900 | 1.29142600  | -2.21455400 |
| Cd | -3.94366600 | -1.75788700 | 0.74931800  |
| Cd | -2.22415800 | 1.68783300  | 1.40571900  |
| Cd | -2.61283400 | -2.69073100 | -2.25079000 |
| Cd | -1.42061400 | -0.58821100 | 3.73541700  |
| Cd | -0.90728900 | 3.55306700  | -1.90444400 |
| Se | -2.39709900 | -3.92157200 | 0.18998500  |
| Se | -0.10167200 | 1.93063500  | 3.28790000  |
| Se | -1.49320100 | 1.97486400  | -4.03213000 |
| Se | -0.70539800 | -2.63865500 | -4.17149600 |
| Se | 1.55862600  | 4.10651300  | -1.00075200 |
| Se | 0.54289400  | -2.39986400 | 3.71204200  |
| Cd | 0.07337800  | -0.07825800 | -3.24925400 |



|    |             |             |             |
|----|-------------|-------------|-------------|
| Cd | 1.29593800  | 2.13979900  | 0.87660100  |
| Cd | -0.04424100 | -2.82122200 | 1.02180800  |
| Se | -0.24383400 | -0.11472800 | -0.27692800 |
| Se | 2.82918700  | -0.14367900 | -3.11158000 |
| Se | 2.30205100  | -3.67193600 | -0.23013300 |
| Se | 3.67849700  | 0.77236900  | 1.41448200  |
| Cd | 1.12862900  | -3.48706700 | -2.53153200 |
| Cd | 3.00936100  | 2.43524300  | -2.52558200 |
| Cd | 1.91970200  | -0.12310300 | 3.23040100  |
| Cd | 2.77752800  | -0.95665300 | -0.47277200 |
| C  | 4.52876400  | 5.18472000  | -4.05630700 |
| C  | 5.62067000  | 4.46178500  | -3.26455200 |
| C  | 6.51686100  | 3.58108200  | -4.12003900 |
| O  | 6.77267100  | 4.12321700  | -5.31312600 |
| O  | 6.97606100  | 2.52881300  | -3.74160900 |
| N  | 5.09568500  | 3.65071200  | -2.16997200 |
| H  | 3.94528400  | 5.81263000  | -3.37633800 |
| H  | 4.98184500  | 5.83442400  | -4.80674800 |
| H  | 6.28819200  | 5.25389600  | -2.88612700 |
| H  | 5.81214300  | 2.98813200  | -1.87638200 |
| H  | 4.87173600  | 4.23831300  | -1.37086700 |
| S  | 3.29466200  | 4.11656600  | -4.86310700 |
| H  | 4.13096900  | 3.47153100  | -5.69805100 |
| H  | 7.39222800  | 3.54286500  | -5.78328100 |

(CdSe)<sub>16</sub>

|    |             |             |             |
|----|-------------|-------------|-------------|
| Se | -5.00237700 | 1.93714600  | 0.72467600  |
| Se | -4.93777700 | -0.98087200 | -2.06517000 |
| Se | -2.52695000 | 3.13710200  | -3.30868800 |
| Se | -1.21257500 | -1.33319200 | -4.84861500 |
| Se | 1.90547300  | 1.15697500  | -4.43344100 |
| Se | 2.60729000  | -3.22037800 | -2.32634400 |
| Se | -2.01919600 | -4.47675600 | -1.50569300 |
| Se | 0.29919400  | -4.89670300 | 1.74444100  |
| Se | -3.94616200 | -2.48678400 | 2.54498800  |
| Se | -2.23770000 | 1.69838000  | 4.41547800  |
| Se | -1.46112400 | 4.92487800  | 1.16963600  |
| Se | 2.36961200  | 2.74027100  | 3.25699300  |
| Se | 0.27821300  | -1.44851300 | 4.84346100  |
| Se | 3.86451900  | -1.79646900 | 2.16392800  |
| Se | 4.64099100  | 0.92877000  | -0.69051700 |
| Se | 1.71742800  | 4.50934700  | -1.27802400 |
| Cd | -1.00695900 | 4.34242200  | -1.44647200 |
| Cd | 1.15615700  | 4.22721700  | 1.36696000  |
| Cd | -3.00036700 | 2.96808600  | 2.18253900  |
| Cd | 0.43045000  | 1.18871600  | 4.28027400  |
| Cd | -4.28294500 | 1.65498300  | -1.87929800 |
| Cd | -4.83216200 | -0.78847000 | 0.65440500  |
| Cd | -2.25770400 | -1.00959400 | 4.04728800  |
| Cd | -2.20945100 | -4.02959400 | 1.18051300  |
| Cd | 1.77754500  | -3.18652000 | 3.25534300  |
| Cd | 3.77407100  | 0.89964700  | 1.88747700  |
| Cd | -2.78715700 | -2.33533700 | -2.91772400 |
| Cd | 2.88792800  | 2.27579300  | -2.20358200 |
| Cd | -0.80464200 | 1.30909400  | -4.29984100 |
| Cd | 1.34213800  | -1.46159400 | -3.91964800 |
| Cd | 0.63008600  | -4.32621500 | -0.87613700 |
| Cd | 3.94425700  | -1.69063800 | -0.54739400 |

|   |            |             |            |
|---|------------|-------------|------------|
| C | 4.16412100 | -5.72197400 | 4.81749100 |
| C | 2.97624800 | -5.38915800 | 5.72063700 |
| C | 1.81983900 | -6.36951600 | 5.61799200 |
| O | 2.22695900 | -7.62556500 | 5.40666800 |
| O | 0.66184400 | -6.05484400 | 5.76498600 |
| N | 2.45332000 | -4.04946400 | 5.48814200 |
| H | 4.95116200 | -4.97977800 | 4.98031300 |
| H | 4.57147600 | -6.69855900 | 5.08537300 |
| H | 3.33956300 | -5.50408100 | 6.75727100 |
| H | 1.56627400 | -3.92999300 | 5.97556500 |
| H | 3.08979500 | -3.34902300 | 5.85803200 |
| S | 3.82356900 | -5.66188100 | 3.03333400 |
| H | 1.44094300 | -8.19432300 | 5.39584700 |
| H | 2.99447900 | -6.72080400 | 2.99017300 |

(CdSe)<sub>19</sub>

|    |             |             |             |
|----|-------------|-------------|-------------|
| Cd | 0.17619900  | -0.32532200 | 3.61001100  |
| Se | -2.41927100 | -1.45722400 | 3.20086000  |
| Se | 0.20296100  | 2.34413200  | 2.76098800  |
| Cd | 4.44503400  | -0.05403200 | 1.81001100  |
| Cd | 2.22366600  | 3.64781000  | 1.55765000  |
| Cd | -2.09385400 | 3.63567500  | 2.46047000  |
| Cd | -4.26505900 | -0.05746100 | 1.79885300  |
| Cd | 2.24256600  | -3.78864200 | 1.23252800  |
| Cd | -2.17370300 | -3.79547600 | 1.97670000  |
| Se | 0.03835900  | -5.30134200 | 1.51387600  |
| Se | 4.68820200  | 2.62695000  | 1.66079500  |
| Se | -4.56723000 | 2.55782300  | 2.21518800  |
| Se | 2.52358100  | -1.61369700 | 2.79480900  |
| Se | 3.78266300  | -4.53000600 | -0.83908700 |
| Se | 6.31558900  | -0.53207300 | -0.13406800 |
| Cd | 5.03858700  | -2.25540200 | -1.68155800 |
| Se | 2.00001200  | 5.76155600  | -0.08484200 |
| Se | -2.61531400 | 5.75981300  | 0.78202400  |
| Se | -5.96240800 | -0.94291800 | -0.10958200 |
| Cd | -0.61297400 | 5.77769800  | -0.94628400 |
| Cd | -4.76210400 | -3.08884400 | -1.31356700 |
| Cd | -4.27898600 | 3.81146000  | -0.17146500 |
| Cd | -1.19718900 | -5.33756200 | -0.93431700 |
| Cd | 5.32109700  | 1.90211700  | -0.90767700 |
| Se | -3.69843700 | -5.07520500 | 0.07865100  |
| Se | -4.15596900 | 2.79859000  | -2.66392700 |
| Cd | -4.86001900 | 0.26206500  | -2.28266800 |
| Se | 4.01453400  | 2.55307600  | -3.18127800 |
| Cd | 2.28460500  | 4.44770800  | -2.43282000 |
| Se | -0.36970200 | -4.45472700 | -3.34892300 |
| Cd | 2.19862600  | -3.86577400 | -2.94758200 |
| Cd | -1.50559900 | 2.64694800  | -3.29069100 |
| Se | -0.17077700 | 4.95316400  | -3.51645100 |
| Se | -4.22526700 | -1.97302600 | -3.74336700 |
| Cd | -1.55147000 | -2.01268600 | -3.58485100 |
| Se | 3.73826300  | -1.93999500 | -4.06789200 |
| Cd | 2.45141200  | 0.37562300  | -3.66673300 |
| Se | -0.19004400 | 0.28252400  | -3.02655400 |
| C  | 0.02880200  | -0.50419100 | 7.33933000  |
| C  | 0.58462800  | -1.81290900 | 6.78959400  |
| C  | 2.10605700  | -1.81801600 | 6.75977100  |
| O  | 2.81463300  | -0.90354200 | 7.11574000  |

|   |             |             |            |
|---|-------------|-------------|------------|
| O | 2.56766000  | -2.98771400 | 6.31226100 |
| N | 0.07596900  | -2.09837600 | 5.44953500 |
| S | 0.20484400  | 0.93849700  | 6.24488600 |
| H | -1.04860400 | -0.60837300 | 7.49640900 |
| H | 0.48631400  | -0.28234600 | 8.30552500 |
| H | 1.54137000  | 1.05546300  | 6.35228400 |
| H | 0.30210500  | -2.60372300 | 7.50468900 |
| H | -0.92440000 | -2.28906200 | 5.47610400 |
| H | 0.53351700  | -2.92164700 | 5.06474100 |
| H | 3.53244800  | -2.93012000 | 6.23240100 |
